# Supplementary material for: Phosphorescent cyclometalated platinum(ii) complexes with phenyldiazine N^C ligands
Source: Royal Society of Chemistry journal article supplement (doi:10.1039/d2dt03690h), 2023-01-01
Supplement: d2dt03690h1.pdf [file d2dt03690h1.pdf]

## SUPPORTING INFORMATION

### Phosphorescent cyclometalated platinum(II) complexes with phenyldiazine N<sup>^</sup>C ligands

Mariia Hruzd,<sup>[a]</sup> Samia Kahlal,<sup>[a]</sup> Nicolas le Poul,<sup>[b]</sup> Laurianne Wojcik,<sup>[b]</sup> Marie Cordier,<sup>[a]</sup>

Jean-Yves Saillard,<sup>[a]</sup> Julián Rodríguez-López,<sup>[c]</sup> Françoise Robin-le Guen,<sup>[a]</sup>

Sébastien Gauthier,<sup>\*[a]</sup> and Sylvain Achelle<sup>\*[a]</sup>

<sup>[a]</sup> Univ. Rennes, CNRS, ISCR (Institut des Sciences Chimiques de Rennes), UMR 6226, F-35000 Rennes, France

<sup>[b]</sup> Université de Bretagne Occidentale, Laboratoire de Chimie, Electrochimie Moléculaires et Chimie Analytique, UMR CNRS 6521, UFR Science et Techniques, 6 Avenue Victor le Gorgeu – CS 93837, Brest Cedex 3, France

<sup>[c]</sup> Universidad de Castilla-La Mancha, Área de Química Orgánica, Facultad de Ciencias y Tecnologías Químicas, Avda. Camilo José Cela 10, 13071, Ciudad Real, Spain

## Table of Contents

|                                            |           |
|--------------------------------------------|-----------|
| <b>EXPERIMENTAL SECTION .....</b>          | <b>3</b>  |
| <b>General Methods .....</b>               | <b>3</b>  |
| <b>Synthesis of Ligands 25-38 .....</b>    | <b>6</b>  |
| <b>Synthesis of Complexes 1-24 .....</b>   | <b>10</b> |
| <b>NMR spectra.....</b>                    | <b>17</b> |
| <b>Crystallographic Data .....</b>         | <b>49</b> |
| <b>Additional Cyclic Voltammetry .....</b> | <b>53</b> |
| <b>Additional Photophysical Data.....</b>  | <b>59</b> |
| <b>Additional Theoretical Results.....</b> | <b>69</b> |
| <b>Cartesian coordinates (Å).....</b>      | <b>79</b> |

## EXPERIMENTAL SECTION

### General Methods

In air- and moisture-sensitive reactions, all glassware was flame-dried. All reactions were conducted under a dry nitrogen atmosphere using Schlenk techniques, but workups were used as received. The starting materials were purchased from Sigma-Aldrich, TCI or Alfa-Aesar and were used as received. **Thin layer chromatography (TLC)** was conducted on pre-coated aluminum sheets with 0.20 mm Merck Alugram SIL G/UV254 with fluorescent indicator UV254 and 0.25 mm Merck silica gel (60-F254). **Column chromatography** was carried out using *Sigma-Aldrich* silica gel 60 (particle size 63-200  $\mu\text{m}$ ) and Macherey Nagel Aluminum neutral oxide 40 (particle size 40-160  $\mu\text{m}$ ). **Nuclear magnetic resonance (NMR) spectra** were acquired at room temperature on a Bruker AC-300 spectrometer ( $^1\text{H}$  at 300 MHz,  $^{13}\text{C}$  at 75 MHz,) and referenced as follows:  $^1\text{H}$  NMR, residual  $\text{CHCl}_3$  ( $\delta = 7.26$  ppm);  $^{13}\text{C}\{^1\text{H}\}$  NMR, internal  $\text{CDCl}_3$  ( $\delta = 77.16$  ppm). The chemical shifts  $\delta$  are reported in parts per million relative to TMS ( $^1\text{H}$ , 0.0 ppm) and  $\text{CDCl}_3$  ( $^{13}\text{C}$ , 77.16 ppm). The coupling constant  $J$  is given in Hz. In the  $^1\text{H}$  NMR spectra, the following abbreviations are used to describe the peak pattern: *s* (singlet), *d* (doublet), *dd* (doublet of doublet), *t* (triplet), and *m* (multiplet). Acidic impurities in  $\text{CDCl}_3$  were removed by treatment with anhydrous  $\text{K}_2\text{CO}_3$ . **IR spectra** were recorded on a Perkin-Elmer spectrum 100 spectrometer with an ATR sampling accessory. **UV visible** absorption spectra were recorded on a Jasco V-650 spectrophotometer. **Emission spectra** were measured on a Horiba Fluoromax spectrometer. Complexes were excited at their absorption maxima (band of lowest energy) to record the emission spectra in degassed DCM. The emission quantum yields of these complexes were calculated relative to 9,10 – Bis (phenylethynyl) anthracene in cyclohexane ( $\Phi_{\text{em}} = 1$ ) as the reference solution.<sup>1</sup> The **phosphorescence lifetimes** measurements of deoxygenated DCM solutions samples were performed on the same spectrometer in the phosphorimeter mode. UV-vis and fluorescence spectra were recorded using standard 1 cm quartz cells. Stokes shifts were calculated by considering the lowest energetic absorption and the highest energy emission bands. **High Resolution Mass Spectrometry (HRMS)** analyses were performed at the “Centre Régional de Mesures Physiques de l'Ouest” (CRMPO, University of Rennes 1, France) using a Bruker MicroTOFQ II apparatus. **Cyclic voltammetry** The electrochemical studies were performed in a glovebox (Jacomex) ( $\text{O}_2 < 1$  ppm,  $\text{H}_2\text{O} < 1$  ppm) with a home-made 3-electrode cell (WE: Pt, RE: Ag wire, CE: Pt). Ferrocene was added at the end of each experiment to determine the redox potential values. The potential of the cell was controlled by an AUTOLAB PGSTAT 100 (Metrohm) potentiostat monitored by the NOVA<sup>®</sup> software (Metrohm). Dichloromethane was freshly distilled from  $\text{CaH}_2$  and kept under Ar in the glovebox. The supporting salt  $\text{NBu}_4\text{PF}_6$  Synthesized from  $\text{NBu}_4\text{OH}$  (Fluka) and  $\text{HPF}_6$  (Aldrich). It was then purified, dried under vacuum for 48 hours at  $100^\circ\text{C}$ , and then kept under  $\text{N}_2$  in the glovebox.

---

<sup>1</sup> M. Taniguchi and J. S. Lindsey, *Photochem. Photobiol.*, 2018, **94**, 290.

## Computational Details.

DFT calculations were carried out using the Gaussian16 package,<sup>2</sup> employing the PBE0 functional,<sup>3</sup> together with the Def2-TZVP basis set with a relativistic pseudopotential for Pt, from EMSL Basis Set Exchange Library.<sup>4</sup> Implicit solvent (chloroform) effects were included in all calculations through the polarizable continuum model (PCM).<sup>5</sup> The optimized geometries were fully characterized as true minima by analytical frequency calculations (no imaginary values). The geometries obtained from DFT calculations were used to perform natural atomic charge analysis with the NBO 6.0 program.<sup>6</sup> The ionization energies and electron affinities were computed as the difference between the energies of the corresponding cation and anion, respectively, and that of the neutral complex. These energies were taken after full geometry optimizations, on the minima of these three potential-energy surfaces and with equilibrium solvation. TD-DFT calculations were carried out at the same level of calculations. The graphical SWizard program<sup>7</sup> was used for simulating UV-vis spectra. TD-DFT calculations found the lowest triplet state to result from a HOMO-LUMO transition. Thus, phosphorescence was assumed to occur from this triplet state, which was fully optimized at the PBE0/Def2-TZVP level. The phosphorescence emission spectra were computed within the Franck-Condon principle by using the Adiabatic Hessian method<sup>8</sup> which takes into account vibrational mode mixing and a proper description of both optimized ground and excited (triplet) states potential energy surfaces. The lowest normal modes in the vibronic treatment were neglected in order to obtain sufficient spectrum progression. We employed the class-based pre-screening to limit the number of terms involved in the vibronic calculation with the following settings: Cmax1 = 70,

---

<sup>2</sup> Gaussian 16, Revision B.01, M. J. Frisch, G. W. Trucks, H. B. Schlegel, G. E. Scuseria, M. A. Robb, J. R. Cheeseman, G. Scalmani, V. Barone, G. A. Petersson, H. Nakatsuji, X. Li, M. Caricato, A. V. Marenich, J. Bloino, B. G. Janesko, R. Gomperts, B. Mennucci, H. P. Hratchian, J. V. Ortiz, A. F. Izmaylov, J. L. Sonnenberg, D. Williams-Young, F. Ding, F. Lipparini, F. Egidi, J. Goings, B. Peng, A. Petrone, T. Henderson, D. Ranasinghe, V. G. Zakrzewski, J. Gao, N. Rega, G. Zheng, W. Liang, M. Hada, M. Ehara, K. Toyota, R. Fukuda, J. Hasegawa, M. Ishida, T. Nakajima, Y. Honda, O. Kitao, H. Nakai, T. Vreven, K. Throssell, J. A. Montgomery, Jr., J. E. Peralta, F. Ogliaro, M. J. Bearpark, J. J. Heyd, E. N. Brothers, K. N. Kudin, V. N. Staroverov, T. A. Keith, R. Kobayashi, J. Normand, K. Raghavachari, A. P. Rendell, J. C. Burant, S. S. Iyengar, J. Tomasi, M. Cossi, J. M. Millam, M. Klene, C. Adamo, R. Cammi, J. W. Ochterski, R. L. Martin, K. Morokuma, O. Farkas, J. B. Foresman, and D. J. Fox, Gaussian, Inc., Wallingford CT, 2016.

<sup>3</sup> a) J. P. Perdew, K. Burke and M. Ernzerhof, *Phys. Rev. Lett.*, 1996, **77**, 3865–3868; b) J. P. Perdew, K. Burke and M. Ernzerhof, *Phys. Rev. Lett.*, 1997, **78**, 1396–1396; d) C. Adamo and V. Barone, *J. Chem. Phys.*, 1999, **110**, 6158–6170.

<sup>4</sup> a) A. Schäfer, H. Horn and R. Ahlrichs, *J. Chem. Phys.*, 1992, **97**, 2571–2577; b) A. Schäfer, C. Huber and R. Ahlrichs, *J. Chem. Phys.*, 1994, **100**, 5829–5835.

<sup>5</sup> a) J. Tomasi, R. Cammi, B. Mennucci, C. Cappelli and S. Corni, *Phys. Chem. Chem. Phys.*, 2002, **4**, 5697–5712; b) J. Tomasi, B. Mennucci and R. Cammi, *Chem Rev*, 2005, **105**, 2999–3093.

<sup>6</sup> E. D. Glendening, J. K. Badenhoop, A. E. Reed, J. E. Carpenter, J. A. Bohmann, C. M. Morales, C. R. Landis, F. Weinhold, NBO 6.0; Theoretical Chemistry Institute, University of Wisconsin, Madison, WI, 2013, <http://nbo6.chem.wisc.edu>.

<sup>7</sup> a) S. I. Gorelsky, SWizard program, <http://www.sg-chem.net/>, University of Ottawa, Ottawa, Canada, 2013; b) S. I. Gorelsky and A. B. P. Lever, *J. Organomet. Chem.*, 2001, **635**, 187–196.

<sup>8</sup> a) M. Cossi, V. Barone, R. Cammi and J. Tomasi, *Chem. Phys. Lett.*, 1996, **255**, 327–335; b) V. Barone, M. Cossi and J. Tomasi, *J. Chem. Phys.*, 1997, **107**, 3210–3221.

Cmax2 = 70, Nmax1 = 100 × 108.<sup>9</sup> All the vibronic plots were realized using the VMS piece of software.<sup>10</sup> Charge transfers associated with the triplet→singlet emissive transitions were illustrated by plots of the differences between the densities of the excited and ground states and quantified by associated charge transfer values and distances as defined by Adamo and co-workers.<sup>11</sup>

## X-ray Structure Determination

The SCXRD studies of **7** (CCDC 2211426), **12** (CCDC 2211427) and **14** (CCDC 2211428) were performed on an APEXII, Bruker AXS diffractometer equipped with a CCD plate detector and a Mo-K $\alpha$  radiation ( $\lambda = 0.71073$  Å, graphite monochromator). Measurements were done at 150K. Crystal structures were solved by dual-space algorithm using the SHELXT program,<sup>12</sup> and then refined with full-matrix least-square methods based on F<sup>2</sup> (SHELXL).<sup>13</sup> All non hydrogen atoms were refined with anisotropic atomic displacement parameters. H atoms were finally included in the structural model in their calculated positions, and constrained to ride on the attached carbon atom. Relevant collection and refinement data for all compounds are given in the Supporting Information. All data can be obtained from the Cambridge Structural Database via [www.ccdc.cam.ac.uk/data\\_request/cif](http://www.ccdc.cam.ac.uk/data_request/cif).

---

<sup>9</sup> a) F. Santoro, R. Improta, A. Lami, J. Bloino and V. Barone, *J. Chem. Phys.*, 2007, **126**, 084509; b) F. Santoro, A. Lami, R. Improta and V. Barone, *J. Chem. Phys.*, 2007, **126**, 184102; c) F. Santoro, A. Lami, R. Improta, J. Bloino and V. Barone, *J. Chem. Phys.*, 2008, **128**, 224311.

<sup>10</sup> Licari, A. Baiardi, M. Biczysko, F. Egidi, C. Latouche and V. Barone, *J. Comput. Chem.*, 2015, **36**, 321–334.

<sup>11</sup> a) T. Le Bahers, C. Adamo and I. Ciofini, *J. Chem. Theory Comput.*, **2011**, *7*, 2498–2506; b) I. Ciofini, T. Le Bahers, C. Adamo, F. Odobel and D. Jacquemin, *J. Phys. Chem. C*, 2012, **116**, 11946–11955; c) D. Jacquemin, T. Le Bahers, C. Adamo and I. Ciofini, *Phys. Chem. Chem. Phys.*, 2012, **14**, 5383–5388.

<sup>12</sup> G. M. Sheldrick, SHELXT - Integrated Space-group and Crystal-structure Determination. *Acta Cryst.*, 2015, **A71**, 3.

<sup>13</sup> G. M. Sheldrick, Crystal Structure Refinement with SHELXL. *Acta Cryst.* 2015, **C71**, 3.

## Synthesis of Ligands 25-38

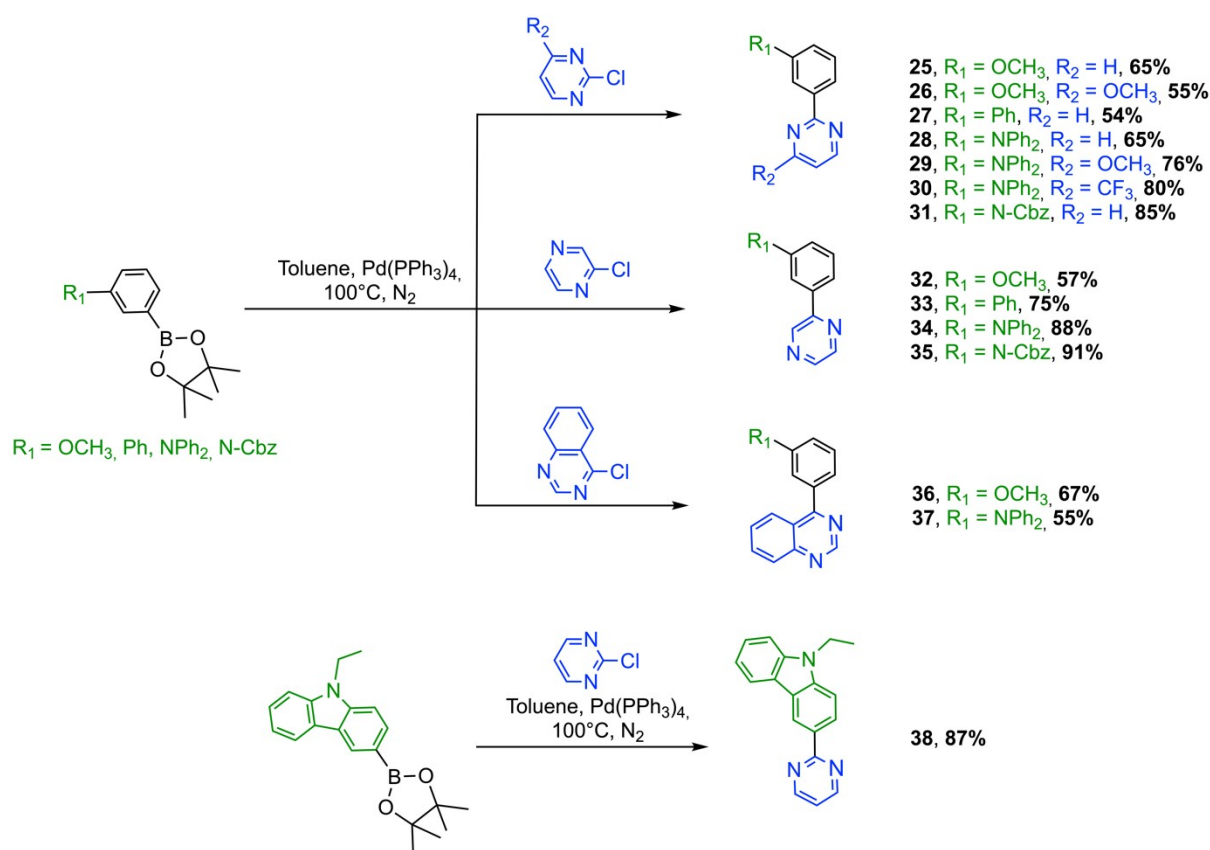

Scheme S1: Synthesis of ligands 25-38.

**General procedure Suzuki cross coupling reaction:** Chlorodiazine derivatives (1.1 equiv) and corresponding pinacol ester (1 equiv) were dissolved in toluene (20mL), and nitrogen was bubbled through the solution for 10 min. Pd(PPh<sub>3</sub>)<sub>4</sub> (5 %) and 20% aqueous K<sub>2</sub>CO<sub>3</sub> were added, and then the reaction was reflux for 15h. The reaction mixture was cooled to room temperature and diluted with EtOAc/aqueous NH<sub>4</sub>Cl (1:1, 100 mL). Organic layer was separated, and the aqueous one was extracted with EtOAc (2 × 50 mL). The combined organic extracts were dried over anhydrous MgSO<sub>4</sub> and solvent was evaporated under reduced pressure. The solid residue was purified by silica gel column chromatography (indicated solvents).

**2-(3-methoxyphenyl)pyrimidine (25):** Synthesized from 2-chloropyrimidine (252 mg, 2.2 mmol) and 3-methoxyphenylboronic acid pinacol ester (470 mg, 2 mmol) following the general procedure Suzuki cross coupling. The crude product was purified by silica gel column chromatography (Petroleum ether /EtOAc, 9:1, v/v) to give compound **25** as a pale yellow oil that slowly crystallizes in 65% yield (243 mg). Spectroscopic data were similar to literature.<sup>14</sup>

<sup>14</sup> M. Fecková, S. Kahlal, T. Roisnel, J.-Y. Saillard, J. Boixel, M. Hruzd, P. le Poul, S. Gauthier, F. Robin-le Guen, F. Bureš, S. Achelle, *Eur. J. Inorg. Chem.* 2021, 1592.

**4-methoxy-2-(3-methoxyphenyl)pyrimidine (26):** Synthesized from 2-chloro-4-methoxypyrimidine (318 mg, 2.2 mmol) and 3-methoxyphenylboronic acid pinacol ester (470 mg, 2 mmol) following the general procedure Suzuki cross coupling. The crude product was purified by silica gel column chromatography (Petroleum ether /EtOAc, 9:1, v/v) to give compound **26** as a pale-yellow oil in 55% yield (240 mg). NMR ( $\delta$  (ppm), CDCl<sub>3</sub>): <sup>1</sup>H (300 MHz): 8.45 (d, <sup>3</sup>J<sub>HH</sub> = 5.7 Hz, 1H), 8.09–8.03 (m, 1H), 8.03–7.99 (m, 1H), 7.37 (t, <sup>3</sup>J<sub>HH</sub> = 7.9 Hz, 1H), 7.01 (dd, <sup>3</sup>J<sub>HH</sub> = 8.2 Hz, <sup>4</sup>J<sub>HH</sub> = 2.6 Hz, 1H), 6.57 (d, <sup>3</sup>J<sub>HH</sub> = 5.7 Hz, 1H), 4.02 (s, 3H), 3.86 (s, 3H); <sup>13</sup>C{<sup>1</sup>H} NMR (JMOD, 75 MHz, CDCl<sub>3</sub>): 168.9 (C), 163.6 (C), 159.4 (C), 156.8 (CH), 138.5 (C), 128.9 (CH), 120.3 (CH), 116.4 (CH), 112.6 (CH), 105.8 (CH), 54.8 (OCH<sub>3</sub>), 52.9 (OCH<sub>3</sub>); HRMS (ESI) *m/z* calculated for C<sub>12</sub>H<sub>13</sub>N<sub>2</sub>O<sub>2</sub> [M+Na]<sup>+</sup>: 217.0972, found: 217.0974 (1 ppm).

**2-([1,1'-biphenyl]-3-yl)pyrimidine (27):** Synthesized from 2-chloropyrimidine (252 mg, 2.2 mmol) and 3-biphenylboronic acid pinacol ester (561 mg, 2 mmol) following the general procedure Suzuki cross coupling. The crude product was purified by silica gel column chromatography (Petroleum ether /EtOAc, 8:2, v/v) to give compound **27** as white solid in 54% yield (251 mg). CAS Number: 377047-38-6. NMR ( $\delta$  (ppm), CDCl<sub>3</sub>): <sup>1</sup>H (300 MHz): 8.61 – 8.46 (m, 3H), 8.27 (dt, <sup>3</sup>J<sub>HH</sub> = 7.9 Hz, <sup>3</sup>J<sub>HH</sub> = 1.4 Hz, 1H), 7.54 – 7.41 (m, 3H), 7.35 – 7.27 (m, 1H), 7.25 – 7.17 (m, 2H), 7.16 – 7.07 (m, 1H), 6.91 (t, <sup>3</sup>J<sub>HH</sub> = 4.8 Hz, 1H).

***N,N*-diphenyl-3-(pyrimidin-2-yl)aniline (28) :** Synthesized from 2-chloropyrimidine (252 mg, 2.2 mmol) and 4-(Diphenylamino)phenylboronic acid pinacol ester (743 mg, 2 mmol) following the general procedure Suzuki cross coupling. The crude product was purified by silica gel column chromatography (Petroleum ether /EtOAc, 9:1, v/v) to give compound **28** as pale-yellow solid in 65% yield (421 mg). Spectroscopic data were similar to literature.<sup>12</sup>

**3-(4-methoxypyrimidin-2-yl)-*N,N*-diphenylaniline (29):** Synthesized from 2-chloro-4-methoxypyrimidine (318 mg, 2.2 mmol) and 4-(Diphenylamino)phenylboronic acid pinacol ester (743 mg, 2 mmol) following the general procedure Suzuki cross coupling. The crude product was purified by silica gel column chromatography (DCM) to give compound **29** as pale-yellow solid in 76% yield (538 mg). NMR ( $\delta$  (ppm), CDCl<sub>3</sub>): <sup>1</sup>H (300 MHz): 8.47 (d, <sup>3</sup>J<sub>HH</sub> = 5.7 Hz, 1H), 8.43 – 8.37 (m, 1H), 8.29 – 8.20 (m, 1H), 7.45 (t, <sup>3</sup>J<sub>HH</sub> = 7.9 Hz, 1H), 7.39 – 7.23 (m, 9H), 7.14 – 7.05 (m, 2H), 6.61 (d, <sup>3</sup>J<sub>HH</sub> = 5.7 Hz, 1H), 4.02 (s, 3H); <sup>13</sup>C{<sup>1</sup>H} NMR (JMOD, 75 MHz, CDCl<sub>3</sub>): 168.9 (C), 163.7 (C), 156.8 (CH), 147.7 (C), 147.4 (C), 138.5 (C), 128.9 (CH), 128.8 (CH), 126.1 (CH), 123.8 (CH), 123.4 (CH), 122.4 (CH), 122.2 (CH), 105.7 (CH), 52.9 (CH<sub>3</sub>); HRMS (ESI) *m/z* calculated for C<sub>23</sub>H<sub>20</sub>N<sub>3</sub>O [M+H]<sup>+</sup>: 354.1609, found: 354.1606 (1 ppm).

***N,N*-diphenyl-3-(4-(trifluoromethyl)pyrimidin-2-yl)aniline (30):** Synthesized from 2-chloro-4-(trifluoromethyl)pyrimidine (402 mg, 2.2 mmol) and 4-(diphenylamino)phenylboronic acid pinacol ester (743 mg, 2 mmol) following the general procedure Suzuki cross coupling. The crude product was purified by silica gel column chromatography (Petroleum ether /EtOAc, 10:1, v/v) to give compound **30** as pale-yellow solid in 80% yield (627 mg). NMR ( $\delta$  (ppm), CDCl<sub>3</sub>): <sup>1</sup>H (300 MHz): 8.96 (d, <sup>3</sup>J<sub>HH</sub> = 5.0 Hz, 1H), 8.37 (t, <sup>4</sup>J<sub>HH</sub> = 2.0 Hz, 1H), 8.25 (dt, <sup>3</sup>J<sub>HH</sub> = 7.7 Hz, <sup>4</sup>J<sub>HH</sub> = 1.2 Hz, 1H), 7.51–7.46 (m, 1H), 7.46–7.41 (m, 1H), 7.38–7.29 (m, 5H), 7.26–7.18 (m, 4H), 7.14–7.06 (m, 2H); <sup>13</sup>C{<sup>1</sup>H} NMR (JMOD, 75 MHz, CDCl<sub>3</sub>): 164.9 (C), 159.1 (CH), 155.9 (C, q, <sup>2</sup>J<sub>CF</sub> = 36.2 Hz), 148.2 (C), 147.4 (C), 137.2 (C), 129.4 (CH), 129.0 (CH), 128.9 (CH), 127.1 (CH), 123.9 (CH), 123.7 (CH), 123.4 (CH), 122.7 (CH), 120.6 (CF<sub>3</sub>, q, <sup>1</sup>J<sub>CF</sub> = 273 Hz), 114.0 (CH); HRMS (ESI) *m/z* calculated for C<sub>23</sub>H<sub>17</sub>N<sub>3</sub>F<sub>3</sub> [M+H]<sup>+</sup>: 392.1369, found: 392.1364 (1 ppm).

**9-(3-(pyrimidin-2-yl)phenyl)-9H-carbazole (31):** Synthesized from 2-chloropyrimidine (252 mg, 2.2 mmol) and 9-(3-(4,4,5,5-tetramethyl-1,3,2-dioxaborolan-2-yl)phenyl)-9H-carbazole (740 mg, 2 mmol) following the general procedure Suzuki cross coupling. The crude product was purified by silica gel column chromatography (Petroleum ether /EtOAc, 8:2, v/v) to give compound **31** as white solid in 85% yield (547 mg). NMR ( $\delta$  (ppm), CDCl<sub>3</sub>): <sup>1</sup>H (300 MHz): 8.85 – 8.71 (m, 3H), 8.60 (dt, <sup>3</sup>J<sub>HH</sub> = 7.0 Hz, <sup>4</sup>J<sub>HH</sub> = 1.8 Hz, 1H), 8.25 – 8.16 (m, 1H), 7.81 – 7.67 (m, 2H), 7.57 – 7.42 (m, 4H), 7.34 (td, <sup>3</sup>J<sub>HH</sub> = 7.4 Hz, <sup>4</sup>J<sub>HH</sub> = 1.3 Hz, 2H), 7.18 (t, <sup>3</sup>J<sub>HH</sub> = 4.8 Hz, 1H); <sup>13</sup>C{<sup>1</sup>H} NMR (JMOD, 75 MHz, CDCl<sub>3</sub>): 163.6 (C), 157.0 (CH), 140.6 (C), 139.4 (C), 138.8 (C), 129.8 (CH), 129.0 (CH), 126.8 (CH), 125.7 (CH), 123.1 (C), 120.0 (CH), 119.7 (CH), 119.1 (CH), 109.6 (CH). HRMS (ESI) *m/z* calculated for C<sub>22</sub>H<sub>16</sub>N<sub>3</sub> [M+H]<sup>+</sup>: 322.1339, found: 322.1341 (1 ppm).

**2-(3-methoxyphenyl)pyrazine (32):** Synthesized from 2-chloropyrazine (252 mg, 0.2 ml, 2.2 mmol) and 3-methoxyphenylboronic acid pinacol ester (470 mg, 2 mmol) following the general procedure Suzuki cross coupling. The crude product was purified by silica gel column chromatography (Petroleum ether /EtOAc, 10:1, v/v) to give compound **32** as a pale yellow oil in 57% yield (215 mg). Spectroscopic data were similar to literature.<sup>15</sup>

**2-([1,1'-biphenyl]-3-yl)pyrazine (33):** Synthesized from 2-chloropyrazine (252 mg, 2.2 mmol) and 3-biphenylboronic acid pinacol ester (561 mg, 2 mmol) following the general procedure Suzuki cross coupling. The crude product was purified by silica gel column chromatography (Petroleum ether /EtOAc, 8:2, v/v) to give compound **33** as white solid in 75% yield (350 mg). CAS Number: 2366147-92-2. NMR ( $\delta$  (ppm), CDCl<sub>3</sub>): <sup>1</sup>H (300 MHz): 9.06 (d, <sup>4</sup>J<sub>HH</sub> = 1.6 Hz, 1H), 8.58 (dd, <sup>3</sup>J<sub>HH</sub> = 2.5 Hz, <sup>4</sup>J<sub>HH</sub> = 1.6 Hz, 1H), 8.46 (d, <sup>3</sup>J<sub>HH</sub> = 2.5 Hz, 1H), 8.27 (t, <sup>4</sup>J<sub>HH</sub> = 1.8 Hz, 1H), 7.95 (dt, <sup>3</sup>J<sub>HH</sub> = 7.7, <sup>4</sup>J<sub>HH</sub> = 1.5 Hz, 1H), 7.70 – 7.61 (m, 3H), 7.52 (d, <sup>3</sup>J<sub>HH</sub> = 7.8 Hz, 1H), 7.49 – 7.40 (m, 2H), 7.40 – 7.32 (m, 1H); <sup>13</sup>C{<sup>1</sup>H} NMR (JMOD, 75 MHz, CDCl<sub>3</sub>): 151.7(C), 143.4(CH), 142.3(CH), 141.5(CH), 141.2(C), 139.8(C), 136.1(C), 128.7(CH), 128.2(CH), 127.8(CH), 126.9(CH), 126.5(CH), 125.0(CH), 125.0(CH).

***N,N*-diphenyl-3-(pyrazin-2-yl)aniline (34):** Synthesized from 2-chloropyrazine (252 mg, 0.2 ml, 2.2 mmol) and 4-(Diphenylamino)phenylboronic acid pinacol ester (743 mg, 2 mmol) following the general procedure Suzuki cross coupling. The crude product was purified by silica gel column chromatography (Petroleum ether /EtOAc, 9:1, v/v) to give compound **34** as pale yellow solid in 88% yield (570 mg). NMR ( $\delta$  (ppm), CDCl<sub>3</sub>): <sup>1</sup>H (300 MHz): 8.92 (s, 1H), 8.57 (d, <sup>3</sup>J<sub>HH</sub> = 2.6 Hz, 1H), 8.47 (d, <sup>3</sup>J<sub>HH</sub> = 2.6 Hz, 1H), 7.80–7.75 (m, 1H), 7.67–7.60 (m, 1H), 7.38 (t, <sup>3</sup>J<sub>HH</sub> = 7.9 Hz, 1H), 7.32–7.25 (m, 4H), 7.23–7.12 (m, 5H), 7.06 (tt, <sup>3</sup>J<sub>HH</sub> = 7.2 Hz, <sup>4</sup>J<sub>HH</sub> = 1.2 Hz 2H); <sup>13</sup>C{<sup>1</sup>H} NMR (JMOD, 75 MHz, CDCl<sub>3</sub>): 152.2 (C), 148.4 (C), 147.2 (C), 143.7 (CH), 142.5 (CH), 141.9(CH), 137.2 (C), 129.5 (CH), 129.0 (CH), 124.8 (CH), 124.1 (CH), 122.8 (CH), 121.7 (CH), 120.6 (CH); HRMS (ESI) *m/z* calculated for C<sub>22</sub>H<sub>18</sub>N<sub>3</sub> [M+H]<sup>+</sup>: 324.1495, found: 324.1497 (1 ppm).

**9-(3-(pyrazin-2-yl)phenyl)-9H-carbazole (35):** Synthesized from 2-chloropyrazine (252 mg, 2.2 mmol) and 9-(3-(4,4,5,5-tetramethyl-1,3,2-dioxaborolan-2-yl)phenyl)-9H-carbazole (740 mg, 2 mmol) following the general procedure Suzuki cross coupling. The crude product was purified by silica gel column chromatography (Petroleum ether /EtOAc, 8:2, v/v) to give compound **35** as white solid in 91% yield (585 mg). NMR ( $\delta$  (ppm), CDCl<sub>3</sub>): <sup>1</sup>H (300 MHz): 9.09 (s, 1H), 8.64 (s, 1H), 8.56 (s, 1H), 8.30 (s, 1H), 8.24–8.09 (m, 3H), 7.79–7.65 (m, 2H),

<sup>15</sup> S. Yanagisawa, K. Ueda, T. Taniguchi and K. Itami, *Org. Lett.*, 2008, **10**, 4673.



7.52–7.40 (m, 4H), 7.38–7.30 (m, 2H);  $^{13}\text{C}\{^1\text{H}\}$  NMR (JMOD, 75 MHz,  $\text{CDCl}_3$ ): 151.5 (C), 144.0 (CH), 143.1 (CH), 141.9 (CH), 140.1 (C), 138.2 (C), 138.0 (C), 130.2 (CH), 128.1 (CH), 125.8 (CH), 125.4 (CH), 125.3 (CH), 123.2 (C), 120.1 (CH), 119.8 (CH), 109.4 (CH); HRMS (ESI)  $m/z$  calculated for  $\text{C}_{22}\text{H}_{16}\text{N}_3$   $[\text{M}+\text{H}]^+$ : 322.1338, found: 322.1338 (0 ppm).

**4-(3-methoxyphenyl)quinazoline (36)**: Synthesized from 4-chloroquinazoline (363 mg, 2.2 mmol) and 3-methoxyphenylboronic acid pinacol ester (470 mg, 2 mmol) following the general procedure Suzuki cross coupling. The crude product was purified by silica gel column chromatography (Petroleum ether /EtOAc, 8:2, v/v) to give compound **36** as a pale-yellow oil in 67% yield (317 mg). Spectroscopic data were similar to literature.<sup>16</sup>

**N,N-diphenyl-3-(quinazolin-4-yl)aniline (37)**: Synthesized from 4-chloroquinazoline (363 mg, 2.2 mmol) and 4-(diphenylamino)phenylboronic acid pinacol ester (743 mg, 2 mmol) following the general procedure Suzuki cross coupling. The crude product was purified by silica gel column chromatography (Petroleum ether /EtOAc, 9:1, v/v) to give compound **37** as pale yellow solid in 55% yield (411 mg). NMR ( $\delta$  (ppm),  $\text{CDCl}_3$ ):  $^1\text{H}$  (300 MHz): 9.33 (s, 1H), 8.07 (d,  $^3J_{\text{HH}} = 8.5$  Hz, 2H), 7.86 (td,  $^3J_{\text{HH}} = 6.9$  Hz,  $^4J_{\text{HH}} = 1.2$ , 1H), 7.55 (td,  $^3J_{\text{HH}} = 6.9$  Hz,  $^4J_{\text{HH}} = 1.2$ , 1H), 7.48–7.36 (m, 3H), 7.33–7.23 (m, 5H), 7.22–7.15 (m, 4H), 7.08–6.98 (m, 2H);  $^{13}\text{C}\{^1\text{H}\}$  NMR (JMOD, 75 MHz,  $\text{CDCl}_3$ ): 167.6 (C), 154.3 (CH), 150.7 (C), 142.2 (C), 147.1 (C), 137.8 (C), 133.3 (CH), 129.3 (CH), 129.1 (CH), 128.5 (CH), 127.2 (CH), 126.7 (CH), 124.5 (CH), 124.4 (CH), 124.3 (CH), 123.4 (CH), 123.0 (CH), 122.4 (C); HRMS (ESI)  $m/z$  calculated for  $\text{C}_{26}\text{H}_{20}\text{N}_3$   $[\text{M}+\text{H}]^+$ : 374.1652, found: 374.1654 (1 ppm).

**9-ethyl-2-(pyrimidin-2-yl)-9H-carbazole (38)** Synthesized from 2-chloropyrimidine (252 mg, 2.2 mmol) and 9-Ethyl-9H-carbazol-3-boronic acid pinacol ester (643 mg, 2 mmol) following the general procedure Suzuki cross coupling. The crude product was purified by silica gel column chromatography (Petroleum ether /EtOAc, 7:3, v/v) to give compound **38** as a white solid in 87% yield (476 mg). NMR ( $\delta$  (ppm),  $\text{CDCl}_3$ ):  $^1\text{H}$  (300 MHz): 8.85 (d,  $^3J_{\text{HH}} = 4.8$  Hz, 2H), 8.57 (s, 1H), 8.39 (d,  $^3J_{\text{HH}} = 8.2$  Hz, 1H), 8.27–8.11 (m, 2H), 7.56–7.39 (m, 2H), 7.26 (t,  $^3J_{\text{HH}} = 7.2$  Hz, 1H), 7.18 (t,  $^3J_{\text{HH}} = 4.8$  Hz, 1H), 4.49 (q,  $^3J_{\text{HH}} = 7.2$  Hz, 2H), 1.50 (t,  $^3J_{\text{HH}} = 7.2$  Hz, 3H).  $^{13}\text{C}\{^1\text{H}\}$  NMR (JMOD, 75 MHz,  $\text{CDCl}_3$ ): 166.1 (C), 157.8 (CH), 141.6 (C), 140.3 (C), 135.6 (C), 126.9 (CH), 125.8 (C), 124.0 (CH), 121.5 (C), 120.9 (CH), 119.7 (CH), 119.6 (CH), 119.3 (CH), 109.2 (CH), 109.0 (CH), 38.2 ( $\text{CH}_2$ ), 14.6 ( $\text{CH}_3$ ). HRMS (ESI)  $m/z$  calculated for  $\text{C}_{18}\text{H}_{16}\text{N}_3$   $[\text{M}+\text{H}]^+$ : 274.1339, found: 274.1340 (0 ppm).

## Synthesis of Complexes 1-24

<sup>16</sup> S. S. Yan, B. Yu and H.-M. Liu, *Chem.-Eur. J.*, 2009, **25**, 13109.

**General procedure for the synthesis of Pt<sup>II</sup> complexes:** K<sub>2</sub>PtCl<sub>4</sub> (1 equiv) and ligand (1.2 equiv) were dissolved in a mixture of 2-ethoxyethanol/H<sub>2</sub>O (3:1, 20 mL). The mixture was bubbled with nitrogen for 10 min and then stirred at 90 °C for 15h. The solution was cooled to room temperature and diluted with H<sub>2</sub>O, precipitate was filtrated off, and dried under vacuum.  $\mu$ -Chloro-bridged intermediate was dissolved in CHCl<sub>3</sub> and pyridine (or 4-methoxypyridine / pyrimidine) was added (2.5 equiv). The mixture was stirred at 50 °C for 15h. The reaction mixture was cooled to room temperature and diluted with CH<sub>2</sub>Cl<sub>2</sub>/aqueous NH<sub>4</sub>Cl (1:1, 100 mL). Organic layer was separated, and the aqueous one was extracted with CH<sub>2</sub>Cl<sub>2</sub> (2 × 50 mL). The combined organic extracts were dried over anhydrous MgSO<sub>4</sub> and solvent was evaporated under reduced pressure. The solid residue was purified by silica gel column chromatography (EtOAc/CH<sub>2</sub>Cl<sub>2</sub>, from 1:10 to 1:1, v/v).

**Complex 1:** Synthesized from K<sub>2</sub>PtCl<sub>4</sub> (100 mg, 0.24 mmol), ligand **25** (54 mg, 0.29 mmol) and pyridine (48 mg, 0.05 ml, 0.6 mmol) following the general procedure for the synthesis of Pt<sup>II</sup> complexes. The complex **1** was obtained as a yellow powder. Yield : 44 % (53 mg). Spectroscopic data were similar to literature.<sup>12</sup>

**Complex 2:** Synthesized from K<sub>2</sub>PtCl<sub>4</sub> (100 mg, 0.24 mmol), ligand **25** (54 mg, 0.29 mmol) and 4-methoxypyridine (66 mg, 0.07 ml, 0.6 mmol) following the general procedure for the synthesis of Pt<sup>II</sup> complexes. The complex **2** was obtained as a orange-yellow powder in yield 38 % (48 mg). NMR ( $\delta$  (ppm), CDCl<sub>3</sub>): <sup>1</sup>H (300 MHz): 9.75 (dd, <sup>3</sup>J<sub>HH</sub> = 5.9 Hz, <sup>4</sup>J<sub>HH</sub> = 2.2 Hz, <sup>3</sup>J<sub>PtH</sub> = 57 Hz, 1H), 8.75 (m, <sup>3</sup>J<sub>PtH</sub> = 46.4 Hz, 3H), 7.40 (d, <sup>4</sup>J<sub>HH</sub> = 2.9 Hz, 1H), 7.05 (t, <sup>3</sup>J<sub>HH</sub> = 5.9 Hz, 1H), 6.97–6.86 (m, 2H), 6.73 (dd, <sup>3</sup>J<sub>HH</sub> = 8.4 Hz, <sup>4</sup>J<sub>HH</sub> = 2.9 Hz, 1H), 6.34 (d, <sup>3</sup>J<sub>HH</sub> = 8.4 Hz, <sup>3</sup>J<sub>PtH</sub> = 47.1 Hz, 1H), 3.93 (s, 3H), 3.82 (s, 3H); <sup>13</sup>C {1H} NMR (JMOD, 75 MHz, CDCl<sub>3</sub>): 175.3 (C), 166.1 (C), 157.8 (CH), 157.2 (CH), 156.6 (C), 154.2 (CH), 141.7 (C), 131.6 (C), 130.8 (CH; <sup>2</sup>J<sub>PtC</sub> = 59.2 Hz), 119.7 (CH), 117.2 (CH), 111.8 (CH; <sup>2</sup>J<sub>PtC</sub> = 54.2 Hz), 110.9 (CH), 55.6 (OCH<sub>3</sub>), 55.1 (OCH<sub>3</sub>); HRMS (ESI) *m/z* calculated for C<sub>17</sub>H<sub>16</sub>N<sub>3</sub>O<sub>2</sub><sup>35</sup>ClNa<sup>195</sup>Pt [M+Na]<sup>+</sup>: 547.0471, found: 547.0468 (1 ppm).

**Complex 3:** Synthesized from K<sub>2</sub>PtCl<sub>4</sub> (100 mg, 0.24 mmol), ligand **25** (63 mg, 0.29 mmol) and pyridine (48 mg, 0.05 ml, 0.6 mmol) following the general procedure for the synthesis of Pt<sup>II</sup> complexes. The complex **3** was obtained as a yellow powder. Yield : 43 % (55 mg). NMR ( $\delta$  (ppm), CDCl<sub>3</sub>): <sup>1</sup>H (300 MHz): 9.30 (d, <sup>3</sup>J<sub>HH</sub> = 6.7 Hz, <sup>3</sup>J<sub>PtH</sub> = 32.7 Hz, 1H), 9.02 (d, <sup>3</sup>J<sub>HH</sub> = 3.5 Hz, <sup>3</sup>J<sub>PtH</sub> = 42 Hz, 2H), 7.86 (t, <sup>3</sup>J<sub>HH</sub> = 7.7 Hz, 1H), 7.53–7.30 (m, 3H), 6.69 (dd, <sup>3</sup>J<sub>HH</sub> = 8.3, <sup>4</sup>J<sub>HH</sub> = 2.9 Hz, 1H), 6.49 (d, <sup>3</sup>J<sub>HH</sub> = 6.7 Hz, 1H), 6.24 (d, <sup>3</sup>J<sub>HH</sub> = 8.4 Hz, <sup>3</sup>J<sub>PtH</sub> = 39.6 Hz, 1H), 4.10 (s, 3H), 3.79 (s, 3H); <sup>13</sup>C {1H} NMR (JMOD, 75 MHz, CDCl<sub>3</sub>): 175.4 (C), 169.6 (C), 156.3 (CH), 156.2 (C), 153.8 (CH), 142.1 (C), 137.3 (CH), 131.3 (C), 130.3 (CH; <sup>2</sup>J<sub>PtC</sub> = 58.8 Hz), 125.6 (CH; <sup>3</sup>J<sub>PtC</sub> = 47.2 Hz), 118.4 (CH; <sup>2</sup>J<sub>PtC</sub> = 60 Hz), 111.7 (CH; <sup>2</sup>J<sub>PtC</sub> = 52 Hz), 104.2 (CH), 55.0 (OCH<sub>3</sub>), 54.1 (OCH<sub>3</sub>); HRMS (ESI) *m/z* calculated for C<sub>17</sub>H<sub>16</sub>N<sub>3</sub>O<sub>2</sub><sup>35</sup>ClNa<sup>195</sup>Pt [M+Na]<sup>+</sup>: 547.0471, found: 547.0464 (1 ppm).

**Complex 4:** Synthesized from K<sub>2</sub>PtCl<sub>4</sub> (100 mg, 0.24 mmol), ligand **26** (63 mg, 0.29 mmol) and 4-methoxypyridine (66 mg, 0.07 ml, 0.6 mmol) following the general procedure for

the synthesis of Pt<sup>II</sup> complexes. The complex **4** was obtained as a yellow powder. Yield: 27 % (36 mg). NMR ( $\delta$  (ppm), CDCl<sub>3</sub>): <sup>1</sup>H (300 MHz): 9.35 (d, <sup>3</sup>J<sub>HH</sub> = 6.7 Hz, <sup>3</sup>J<sub>PtH</sub> = 38.4 Hz, 1H), 8.78 (d, <sup>3</sup>J<sub>HH</sub> = 7.2 Hz, <sup>4</sup>J<sub>HH</sub> = 1.5 Hz, <sup>3</sup>J<sub>PtH</sub> = 41.1 Hz, 2H), 7.39 (d, <sup>4</sup>J<sub>HH</sub> = 2.9 Hz, 1H), 6.90 (d, <sup>3</sup>J<sub>HH</sub> = 7.2 Hz, 2H), 6.73 (dd, <sup>3</sup>J<sub>HH</sub> = 8.4 Hz, <sup>4</sup>J<sub>HH</sub> = 2.9 Hz, 1H), 6.52 (d, <sup>3</sup>J<sub>HH</sub> = 6.7 Hz, 1H), 6.36 (d, <sup>3</sup>J<sub>HH</sub> = 8.4 Hz, <sup>3</sup>J<sub>PtH</sub> = 48 Hz, 1H), 4.12 (s, 3H), 3.94 (s, 3H), 3.81 (s, 3H). <sup>13</sup>C {<sup>1</sup>H} NMR (JMOD, 75 MHz, CDCl<sub>3</sub>): 170.4 (C), 166.8 (C), 157.4 (CH), 157.2 (C), 155.2 (CH), 132.3 (C), 131.5 (CH), 126.1 (CH), 119.5 (CH), 112.5 (CH; <sup>2</sup>J<sub>PtC</sub> = 54 Hz), 105.1 (CH), 56.6 (OCH<sub>3</sub>), 56.0 (OCH<sub>3</sub>), 55.0 (OCH<sub>3</sub>); HRMS (ESI) *m/z* calculated for C<sub>18</sub>H<sub>18</sub>N<sub>3</sub>O<sub>3</sub><sup>195</sup>Pt [M - .Cl]<sup>+</sup>: 519.0991, found: 519.0997 (1 ppm).

**Complex 5:** Synthesized from K<sub>2</sub>PtCl<sub>4</sub> (100 mg, 0.24 mmol), ligand **26** (63 mg, 0.29 mmol) and pyrimidine (48 mg, 0.05 ml, 0.6 mmol) following the general procedure for the synthesis of Pt<sup>II</sup> complexes. The complex **5** was obtained as a light green-yellow powder. Yield: 27 % (35 mg). NMR ( $\delta$  (ppm), CDCl<sub>3</sub>): <sup>1</sup>H (300 MHz): 9.67 (s, <sup>3</sup>J<sub>PtH</sub> = 26.4 Hz, 1H), 9.29 (d, <sup>3</sup>J<sub>HH</sub> = 6.7 Hz, 2H), 8.90 (dd, <sup>3</sup>J<sub>HH</sub> = 4.9 Hz, <sup>4</sup>J<sub>HH</sub> = 2.2 Hz, <sup>3</sup>J<sub>PtH</sub> = 43.8 Hz, 1H), 7.56–7.43 (m, 1H), 7.38 (d, <sup>4</sup>J<sub>HH</sub> = 2.9 Hz, 1H), 6.74 (dd, <sup>3</sup>J<sub>HH</sub> = 8.3 Hz, <sup>4</sup>J<sub>HH</sub> = 2.9 Hz, 1H), 6.53 (d, <sup>3</sup>J<sub>HH</sub> = 6.7 Hz, 1H), 6.28 (d, <sup>3</sup>J<sub>HH</sub> = 8.3 Hz, 1H), 4.12 (s, 3H), 3.81 (s, 3H); <sup>13</sup>C {<sup>1</sup>H} NMR (JMOD, 75 MHz, CDCl<sub>3</sub>): 169.6 (C), 160.5 (CH), 157.1 (CH), 156.5 (C), 156.3 (CH), 142.2 (C), 130.0 (CH), 122.1 (CH), 118.5 (CH), 112.1 (CH), 104.5 (CH), 55.09 (OCH<sub>3</sub>), 54.21 (OCH<sub>3</sub>); HRMS (ESI) *m/z* calculated for C<sub>16</sub>H<sub>15</sub>N<sub>4</sub>O<sub>2</sub><sup>35</sup>ClNa<sup>195</sup>Pt [M+Na]<sup>+</sup>: 548.0424, found: 548.0429 (1 ppm).

**Complex 6:** Synthesized from K<sub>2</sub>PtCl<sub>4</sub> (100 mg, 0.24 mmol), ligand **28** (94 mg, 0.29 mmol) and pyridine (48 mg, 0.05 ml, 0.6 mmol) following the general procedure for the synthesis of Pt<sup>II</sup> complexes. The complex **6** was obtained as a orange powder in yield 77 % (117 mg). Spectroscopic data were similar to literature.<sup>12</sup>

**Complex 7:** Synthesized from K<sub>2</sub>PtCl<sub>4</sub> (100 mg, 0.24 mmol), ligand **29** (94 mg, 0.29 mmol) and 4-methoxypyridine (66 mg, 0.07 ml, 0.6 mmol) following the general procedure for the synthesis of Pt<sup>II</sup> complexes. The complex **7** was obtained as a orange powder. Yield: 56% (90 mg). NMR ( $\delta$  (ppm), CDCl<sub>3</sub>): <sup>1</sup>H (300 MHz): 9.78 (dd, <sup>3</sup>J<sub>HH</sub> = 5.9 Hz, <sup>4</sup>J<sub>HH</sub> = 2.2 Hz, <sup>3</sup>J<sub>PtH</sub> = 32.4 Hz, 1H), 8.75 (d, <sup>3</sup>J<sub>HH</sub> = 7.2 Hz, 2H), 8.66 (dd, <sup>3</sup>J<sub>HH</sub> = 4.8 Hz, <sup>4</sup>J<sub>HH</sub> = 2.2 Hz, 1H), 7.67 (d, <sup>4</sup>J<sub>HH</sub> = 2.6 Hz, 1H), 7.27 – 7.15 (m, 4H), 7.06-7.04 (m, 5H), 6.96-6.89 (m, 5H), 6.39 (d, <sup>3</sup>J<sub>HH</sub> = 8.2 Hz, <sup>3</sup>J<sub>PtH</sub> = 47.6 Hz, 1H), 3.91 (s, 3H); <sup>13</sup>C {<sup>1</sup>H} NMR (JMOD, 75 MHz, CDCl<sub>3</sub>): 175.0 (C), 166.1 (C), 157.8 (CH), 157.2 (CH), 154.1 (CH), 147.4 (C), 142.2 (C), 144.0 (C), 135.0 (C), 131.0 (CH), 129.3 (CH), 128.8 (CH), 124.0 (CH), 123.0 (CH), 121.9 (CH), 117.3 (CH), 111.1 (CH; <sup>2</sup>J<sub>PtC</sub> = 54.3 Hz), 55.7 (OCH<sub>3</sub>); HRMS (ESI) *m/z* calculated for C<sub>28</sub>H<sub>23</sub>N<sub>4</sub>O<sup>35</sup>ClNa<sup>195</sup>Pt [M+Na]<sup>+</sup>: 684.1100, found: 684.1092 (1 ppm).

**Complex 8:** Synthesized from K<sub>2</sub>PtCl<sub>4</sub> (100 mg, 0.24 mmol), ligand **28** (103 mg, 0.29 mmol) and pyridine (48 mg, 0.05 ml, 0.6 mmol) following the general procedure for the synthesis of Pt<sup>II</sup> complexes. The complex **8** was obtained as a orange powder. Yield: 62 % (100

mg). NMR ( $\delta$  (ppm), CDCl<sub>3</sub>): <sup>1</sup>H (300 MHz): 9.37 (d, <sup>3</sup>J<sub>HH</sub> = 6.7 Hz, <sup>3</sup>J<sub>PtH</sub> = 33.3 Hz, 1H), 9.00 (dd, <sup>3</sup>J<sub>HH</sub> = 6.5 Hz, <sup>4</sup>J<sub>HH</sub> = 1.5 Hz, <sup>3</sup>J<sub>PtH</sub> = 41.7 Hz, 2H), 7.87 (tt, <sup>3</sup>J<sub>HH</sub> = 7.9 Hz, <sup>4</sup>J<sub>HH</sub> = 1.5 Hz, 1H), 7.63 (d, <sup>4</sup>J<sub>HH</sub> = 2.6 Hz, 1H), 7.45–7.34 (m, 2H), 7.21–7.16 (m, 4H), 7.11–7.01 (m, 4H), 6.9–6.91 (m, 2H), 6.86 (dd, <sup>3</sup>J<sub>HH</sub> = 8.2 Hz, <sup>4</sup>J<sub>HH</sub> = 2.6 Hz, 1H), 6.53 (d, <sup>3</sup>J<sub>HH</sub> = 6.7 Hz, 1H), 6.31 (d, <sup>3</sup>J<sub>HH</sub> = 8.2 Hz, <sup>3</sup>J<sub>PtH</sub> = 46.5 Hz, 1H), 3.97 (s, 3H). <sup>13</sup>C{<sup>1</sup>H} NMR (JMOD, 75 MHz, CDCl<sub>3</sub>): 170.4 (C), 157.4 (CH), 154.7 (CH), 148.3 (C), 144.4 (C), 143.5 (C), 138.3 (CH), 136.3 (C), 131.6 (CH), 130.7 (CH), 129.7 (CH), 126.5 (CH), 125.2 (CH), 124.7 (C), 123.7 (CH), 122.6 (CH), 105.3 (CH), 55.1 (OCH<sub>3</sub>); HRMS (ESI) *m/z* calculated for C<sub>28</sub>H<sub>23</sub>N<sub>4</sub>O<sup>35</sup>ClNa<sup>195</sup>Pt [M+Na]<sup>+</sup>: 684.1100, found: 684.1098 (0 ppm).

**Complex 9:** Synthesized from K<sub>2</sub>PtCl<sub>4</sub> (100 mg, 0.24 mmol), ligand **29** (103 mg, 0.29 mmol) and 4-methoxypyridine (66 mg, 0.07 ml, 0.6 mmol) following the general procedure for the synthesis of Pt<sup>II</sup> complexes. The complex **9** was obtained as a orange powder. Yield: 66% (110 mg). NMR ( $\delta$  (ppm), CDCl<sub>3</sub>): <sup>1</sup>H (300 MHz): 9.37 (d, <sup>3</sup>J<sub>HH</sub> = 6.7 Hz, <sup>3</sup>J<sub>PtH</sub> = 26.7 Hz, 1H), 8.77 (dd, <sup>3</sup>J<sub>HH</sub> = 7.1 Hz, <sup>4</sup>J<sub>HH</sub> = 1.5 Hz, <sup>3</sup>J<sub>PtH</sub> = 38.7 Hz, 2H), 7.62 (d, <sup>4</sup>J<sub>HH</sub> = 2.6 Hz, 1H), 7.24–7.15 (m, 4H), 7.09–7.02 (m, 4H), 6.99–6.83 (m, 5H), 6.52 (d, <sup>3</sup>J<sub>HH</sub> = 6.7 Hz, 1H), 6.40 (d, <sup>3</sup>J<sub>HH</sub> = 7.1 Hz, 1H), 3.97 (s, 3H), 3.92 (s, 3H); <sup>13</sup>C{<sup>1</sup>H} NMR (JMOD, 75 MHz, CDCl<sub>3</sub>): 175.3 (C), 169.5 (C), 166.0 (C), 156.5 (CH), 154.3 (CH), 147.4 (C), 143.3 (C), 142.7 (C), 135.5 (C), 131.0 (CH), 129.9 (CH), 128.8 (CH), 124.3 (CH), 122.8 (CH), 121.7 (CH), 111.3 (CH), 104.4 (CH), 55.7 (OCH<sub>3</sub>), 54.2 (OCH<sub>3</sub>); HRMS (ESI) *m/z* calculated for C<sub>29</sub>H<sub>25</sub>N<sub>4</sub>O<sub>2</sub><sup>35</sup>ClNa<sup>195</sup>Pt [M+Na]<sup>+</sup>: 714.1206, found: 714.1202 (1 ppm).

**Complex 10:** Synthesized from K<sub>2</sub>PtCl<sub>4</sub> (100 mg, 0.24 mmol), ligand **29** (103 mg, 0.29 mmol) and pyrimidine (48 mg, 0.05 ml, 0.6 mmol) following the general procedure for the synthesis of Pt<sup>II</sup> complexes. The complex **10** was obtained as a yellow-orange powder. Yield: 54 % (86 mg). NMR ( $\delta$  (ppm), CDCl<sub>3</sub>): <sup>1</sup>H (300 MHz): 9.69 (s, <sup>3</sup>J<sub>PtH</sub> = 24.9 Hz, 1H), 9.4–9.17 (m, 2H), 8.89 (dd, <sup>3</sup>J<sub>HH</sub> = 4.9 Hz, <sup>4</sup>J<sub>HH</sub> = 2.2 Hz, 1H), 7.63 (d, <sup>4</sup>J<sub>HH</sub> = 2.5 Hz, 1H), 7.54–7.39 (m, 1H), 7.28–7.16 (m, 4H), 7.13–7.04 (m, 4H), 7.00–6.86 (m, 3H), 6.54 (d, <sup>3</sup>J<sub>HH</sub> = 6.8 Hz, 1H), 6.33 (d, <sup>3</sup>J<sub>HH</sub> = 8.2 Hz, <sup>3</sup>J<sub>PtH</sub> = 45.6 Hz, 1H), 3.98 (s, 3H); <sup>13</sup>C{<sup>1</sup>H} NMR (JMOD, 75 MHz, CDCl<sub>3</sub>): 169.5 (C), 160.3 (CH), 157.2 (CH), 156.4 (CH), 147.3 (C), 143.9 (C), 142.4 (C), 134.5 (C), 130.6 (CH), 130.3 (CH), 129.6 (CH), 128.8 (CH), 124.2 (CH), 122.9 (CH), 122.1 (CH), 121.9 (CH), 104.6 (CH), 54.3 (OCH<sub>3</sub>); HRMS (ESI) *m/z* calculated for C<sub>27</sub>H<sub>22</sub>N<sub>5</sub>O<sup>35</sup>Cl<sup>195</sup>Pt [M<sup>+</sup>•]: 662.1156, found: 662.1158 (0 ppm).

**Complex 11:** Synthesized from K<sub>2</sub>PtCl<sub>4</sub> (100 mg, 0.24 mmol), ligand **30** (114 mg, 0.29 mmol) and pyridine (48 mg, 0.05 ml, 0.6 mmol) following the general procedure for the synthesis of Pt<sup>II</sup> complexes. The complex **11** was obtained as a orange powder. Yield: 55 % (93 mg). NMR ( $\delta$  (ppm), CDCl<sub>3</sub>): <sup>1</sup>H (300 MHz): 10.09 (d, <sup>3</sup>J<sub>HH</sub> = 6.0 Hz, <sup>3</sup>J<sub>PtH</sub> = 39.6 Hz, 1H), 8.94 (d, <sup>3</sup>J<sub>HH</sub> = 4.9 Hz, <sup>3</sup>J<sub>PtH</sub> = 44.7 Hz, 2H), 7.89 (tt, <sup>3</sup>J<sub>HH</sub> = 7.7 Hz, <sup>4</sup>J<sub>HH</sub> = 1.6 Hz, 1H), 7.74 (d, <sup>3</sup>J<sub>HH</sub> = 2.6 Hz, <sup>4</sup>J<sub>PtH</sub> = 40.2 Hz, 1H), 7.48–7.40 (m, 2H), 7.34 (d, <sup>3</sup>J<sub>HH</sub> = 5.9 Hz, 1H), 7.25–7.13 (m, 4H), 7.07–6.99 (m, 4H), 6.99–6.89 (m, 3H), 6.31 (d, <sup>3</sup>J<sub>HH</sub> = 8.2 Hz, <sup>3</sup>J<sub>PtH</sub> = 39.9 Hz, 1H); <sup>13</sup>C{<sup>1</sup>H} NMR (JMOD, 75 MHz, CDCl<sub>3</sub>): 159.7 (CH), 153.7 (CH), 147.3 (C), 144.3 (C), 140.7 (C), 138.3 (C), 138.0 (CH), 136.3 (C), 131.1 (CH), 130.8 (CH), 128.9 (CH), 125.9 (CH), 125.0 (CH), 123.0 (CH), 122.1 (CH), 121.7 (C), 113.2 (CH); HRMS (ESI) *m/z* calculated for C<sub>28</sub>H<sub>20</sub>N<sub>4</sub>F<sub>3</sub><sup>35</sup>ClNa<sup>195</sup>Pt [M+Na]<sup>+</sup>: 722.0869, found: 722.0862 (1 ppm).

**Complex 12:** Synthesized from K<sub>2</sub>PtCl<sub>4</sub> (100 mg, 0.24 mmol), ligand **27** (68 mg, 0.29 mmol) and pyridine (48 mg, 0.05 ml, 0.6 mmol) following the general procedure for the

synthesis of Pt<sup>II</sup> complexes. The complex **12** was obtained as a yellow powder. Yield: 66 % (87 mg). NMR ( $\delta$  (ppm), CDCl<sub>3</sub>): <sup>1</sup>H (300 MHz): 9.80 (dd, <sup>3</sup>J<sub>HH</sub> = 5.9 Hz, <sup>4</sup>J<sub>HH</sub> = 2.2 Hz, <sup>3</sup>J<sub>PtH</sub> = 21 Hz, 1H), 9.04 (d, <sup>3</sup>J<sub>HH</sub> = 5.0 Hz, <sup>3</sup>J<sub>PtH</sub> = 25.2 Hz, 2H), 8.77 (dd, <sup>3</sup>J<sub>HH</sub> = 4.8 Hz, <sup>4</sup>J<sub>HH</sub> = 2.3 Hz, 1H), 8.11 (d, <sup>4</sup>J<sub>HH</sub> = 2.2 Hz, 1H), 7.92 (tt, <sup>3</sup>J<sub>HH</sub> = 7.7, <sup>4</sup>J<sub>HH</sub> = 1.6 Hz, 1H), 7.67–7.59 (m, 2H), 7.50–7.39 (m, 4H), 7.38–7.29 (m, 2H), 7.09 (dd, <sup>3</sup>J<sub>HH</sub> = 5.9, <sup>3</sup>J<sub>HH</sub> = 4.7 Hz, 1H), 6.46 (d, <sup>3</sup>J<sub>HH</sub> = 8.0 Hz, <sup>3</sup>J<sub>PtH</sub> = 47.7 Hz, 1H); <sup>13</sup>C{<sup>1</sup>H} NMR (JMOD, 75 MHz, CDCl<sub>3</sub>): 158.0 (CH), 157.2 (CH), 153.8 (CH), 141.7 (C), 140.4 (C), 139.8 (C), 137.7 (CH), 136.5 (C), 131.7 (C), 130.5 (CH), 130.4 (CH), 129.0 (CH), 126.7 (CH), 126.3 (CH), 126.1 (CH), 125.8 (CH), 125.7 (CH), 117.4 (CH); HRMS (ESI) *m/z* calculated for C<sub>21</sub>H<sub>16</sub>N<sub>3</sub><sup>35</sup>ClNa<sup>195</sup>Pt [M+Na]<sup>+</sup>: 563.0573, found: 563.0569 (1 ppm).

**Complex 13:** Synthesized from K<sub>2</sub>PtCl<sub>4</sub> (100 mg, 0.24 mmol), ligand **27** (68 mg, 0.29 mmol) and 4-methoxypyridine (66 mg, 0.07 ml, 0.6 mmol) following the general procedure for the synthesis of Pt<sup>II</sup> complexes. The complex **13** was obtained as a yellow powder. Yield: 65% (85 mg). NMR ( $\delta$  (ppm), CDCl<sub>3</sub>): <sup>1</sup>H (300 MHz): 9.67 (dd, <sup>3</sup>J<sub>HH</sub> = 5.9 Hz, <sup>4</sup>J<sub>HH</sub> = 2.2 Hz, <sup>3</sup>J<sub>PtH</sub> = 34 Hz, 1H), 8.82 (d, <sup>3</sup>J<sub>HH</sub> = 5.2 Hz, <sup>3</sup>J<sub>PtH</sub> = 40.2 Hz, 2H), 8.64 (dd, <sup>3</sup>J<sub>HH</sub> = 4.7 Hz, <sup>4</sup>J<sub>HH</sub> = 2.2 Hz, 1H), 8.03 (s, 1H), 7.68–7.57 (m, 2H), 7.46–7.36 (m, 2H), 7.35–7.27 (m, 2H), 7.00–6.92 (m, 1H), 6.92–6.86 (m, 2H), 6.48 (d, <sup>3</sup>J<sub>HH</sub> = 8.0 Hz, <sup>3</sup>J<sub>PtH</sub> = 40 Hz, 1H), 3.88 (s, 3H); <sup>13</sup>C{<sup>1</sup>H} NMR (JMOD, 75 MHz, CDCl<sub>3</sub>): 175.1 (C), 166.0 (C), 157.7 (CH), 156.9 (CH), 154.2 (CH), 141.7 (C), 140.4 (C), 140.1 (C), 136.0 (C), 130.5 (CH), 130.2 (CH), 128.5 (CH), 126.6 (CH), 126.1 (CH), 125.4 (CH), 117.3 (CH), 111.7 (CH, <sup>2</sup>J<sub>PtC</sub> = 56.4 Hz), 55.7 (OCH<sub>3</sub>); HRMS (ESI) *m/z* calculated for C<sub>22</sub>H<sub>18</sub>N<sub>3</sub>O<sup>35</sup>C<sub>1</sub>Na<sup>195</sup>Pt [M+Na]<sup>+</sup>: 593.0678, found: 593.0675 (1 ppm).

**Complex 14:** Synthesized from K<sub>2</sub>PtCl<sub>4</sub> (100 mg, 0.24 mmol), ligand **31** (93 mg, 0.29 mmol) and pyridine (48 mg, 0.05 ml, 0.6 mmol) following the general procedure for the synthesis of Pt<sup>II</sup> complexes. The complex **14** was obtained as a yellow powder. Yield: 47 % (71 mg). NMR ( $\delta$  (ppm), CDCl<sub>3</sub>): <sup>1</sup>H (300 MHz): 9.89 (dd, <sup>3</sup>J<sub>HH</sub> = 5.9 Hz, <sup>4</sup>J<sub>HH</sub> = 2.2 Hz, <sup>3</sup>J<sub>PtH</sub> = 36.3 Hz, 1H), 9.06 (d, <sup>3</sup>J<sub>HH</sub> = 4.9 Hz, <sup>3</sup>J<sub>PtH</sub> = 43.2 Hz 2H), 8.78 (dd, <sup>3</sup>J<sub>HH</sub> = 4.7 Hz, <sup>4</sup>J<sub>HH</sub> = 2.2 Hz, 1H), 8.20–8.07 (m, 3H), 7.95 (tt, <sup>3</sup>J<sub>HH</sub> = 7.7, <sup>4</sup>J<sub>HH</sub> = 1.6 Hz, 1H), 7.51 (td, <sup>3</sup>J<sub>HH</sub> = 6.5 Hz, <sup>4</sup>J<sub>HH</sub> = 1.5 Hz, 2H), 7.43–7.34 (m, 4H), 7.32–7.24 (m, 3H), 7.18 (t, <sup>3</sup>J<sub>HH</sub> = 5.3 Hz, 1H), 6.63 (d, <sup>3</sup>J<sub>HH</sub> = 8.1 Hz, <sup>3</sup>J<sub>PtH</sub> = 46.2 Hz 1H); <sup>13</sup>C{<sup>1</sup>H} NMR (JMOD, 75 MHz, CDCl<sub>3</sub>): <sup>13</sup>C NMR (75 MHz, CDCl<sub>3</sub>) 163.5 (C), 158.3 (CH), 157.4 (CH), 153.7 (CH), 142.9 (C), 140.6 (C), 139.8 (C), 137.9 (CH), 133.6 (C), 131.3 (CH), 130.7 (CH), 126.0 (CH), 125.9 (CH), 125.6 (C), 123.0 (CH), 120.0 (CH), 119.5 (CH), 117.7 (CH), 109.5 (CH). HRMS (ESI) *m/z* calculated for C<sub>27</sub>H<sub>19</sub>N<sub>4</sub><sup>35</sup>ClNa<sup>195</sup>Pt [M+Na]<sup>+</sup>: 652.0898, found: 652.0846 (1 ppm).

**Complex 15:** Synthesized from K<sub>2</sub>PtCl<sub>4</sub> (100 mg, 0.24 mmol), ligand **31** (93 mg, 0.29 mmol) and 4-methoxypyridine (66 mg, 0.07 ml, 0.6 mmol) following the general procedure for the synthesis of Pt<sup>II</sup> complexes. The complex **15** was obtained as a yellow powder. Yield: 70%

(112 mg). NMR ( $\delta$  (ppm), CDCl<sub>3</sub>): <sup>1</sup>H (300 MHz): 9.84 (dd, <sup>3</sup>J<sub>HH</sub> = 5.9 Hz, <sup>4</sup>J<sub>HH</sub> = 2.2 Hz, <sup>3</sup>J<sub>PtH</sub> = 34 Hz, 1H), 8.82 (d, <sup>3</sup>J<sub>HH</sub> = 7.1 Hz, 2H), 8.71 (dd, <sup>3</sup>J<sub>HH</sub> = 4.8 Hz, <sup>4</sup>J<sub>HH</sub> = 2.3 Hz, 1H), 8.14 (d, <sup>3</sup>J<sub>HH</sub> = 7.7 Hz, 2H), 8.07 (d, <sup>4</sup>J<sub>HH</sub> = 2.4 Hz, 2H), 7.47–7.34 (m, 4H), 7.33–7.21 (m, 3H), 7.11 (t, <sup>3</sup>J = 5.4 Hz, 1H). 6.95 (d, <sup>3</sup>J<sub>HH</sub> = 5.7 Hz, 1H), 6.71 (d, <sup>3</sup>J<sub>HH</sub> = 8.1 Hz, <sup>3</sup>J<sub>PtH</sub> = 40.2 Hz, 1H), 3.92 (s, 3H); <sup>13</sup>C{<sup>1</sup>H} NMR (JMOD, 75 MHz, CDCl<sub>3</sub>): 174.6 (C), 166.2 (C), 158.1 (CH), 157.2 (CH), 154.1 (CH), 142.0 (C), 140.5 (C), 139.8 (C), 133.3 (C), 131.4 (CH), 130.4 (CH), 125.6 (CH), 122.9 (C), 119.9 (CH), 119.5 (CH), 117.7 (CH), 111.9 (CH), 109.5 (CH), 55.7 (OCH<sub>3</sub>); HRMS (ESI) *m/z* calculated for C<sub>28</sub>H<sub>21</sub>N<sub>4</sub>O<sup>35</sup>CINa<sup>195</sup>Pt [M+Na]<sup>+</sup>: 682.0944, found: 682.0946 (0 ppm).

**Complex 16:** Synthesized from K<sub>2</sub>PtCl<sub>4</sub> (100 mg, 0.24 mmol), ligand **38** (80 mg, 0.29 mmol) and pyridine (48 mg, 0.05 ml, 0.6 mmol) following the general procedure for the synthesis of Pt<sup>II</sup> complexes. The complex **16** was obtained as an orange powder. Yield: 65 % (110 mg). NMR ( $\delta$  (ppm), CDCl<sub>3</sub>): <sup>1</sup>H (300 MHz): 9.79 (dd, <sup>3</sup>J<sub>HH</sub> = 5.9 Hz, <sup>4</sup>J<sub>HH</sub> = 2.1 Hz, <sup>3</sup>J<sub>PtH</sub> = 35.4 Hz, 1H), 9.15 (dd, <sup>3</sup>J<sub>HH</sub> = 5.0 Hz, <sup>4</sup>J<sub>HH</sub> = 1.6 Hz, <sup>3</sup>J<sub>PtH</sub> = 41.1 Hz, 2H), 8.68 (s, 1H), 8.05–7.90 (m, 2H), 7.73 (d, <sup>3</sup>J<sub>HH</sub> = 7.7 Hz, 1H), 7.56–7.40 (m, 3H), 7.38–7.29 (m, 1H), 7.09 (t, <sup>3</sup>J<sub>HH</sub> = 7.5 Hz, 1H), 7.02–6.92 (m, 2H), 4.38 (q, <sup>3</sup>J<sub>HH</sub> = 7.2 Hz, 2H), 1.43 (t, <sup>3</sup>J<sub>HH</sub> = 7.2 Hz, 3H). <sup>13</sup>C{<sup>1</sup>H} NMR (JMOD, 75 MHz, CDCl<sub>3</sub>): 175.8 (C), 157.8 (CH), 157.2 (CH), 154.0 (CH), 140.8 (C), 138.2 (C), 137.6 (CH), 137.4 (C), 128.6 (C), 126.6 (C), 126.3 (CH), 125.7 (CH, <sup>2</sup>J<sub>PtC</sub> = 51.6 Hz), 121.9 (C), 121.1 (CH), 120.7 (CH), 118.4 (CH), 116.8 (CH), 108.5 (CH), 107.9 (CH), 37.3 (CH<sub>2</sub>), 13.6 (CH<sub>3</sub>). HRMS (ESI) *m/z* calculated for C<sub>23</sub>H<sub>19</sub>N<sub>4</sub><sup>35</sup>CINa<sup>195</sup>Pt [M+Na]<sup>+</sup>: 604.0838, found: 604.0835 (0 ppm).

**Complex 17:** Synthesized from K<sub>2</sub>PtCl<sub>4</sub> (100 mg, 0.24 mmol), ligand **32** (54 mg, 0.29 mmol) and pyridine (48 mg, 0.05 ml, 0.6 mmol) following the general procedure for the synthesis of Pt<sup>II</sup> complexes. The complex **17** was obtained as an orange powder. Yield: 15 % (20 mg). NMR ( $\delta$  (ppm), CDCl<sub>3</sub>): <sup>1</sup>H (300 MHz): 9.60 (d, <sup>3</sup>J<sub>HH</sub> = 3.3 Hz, <sup>4</sup>J<sub>HH</sub> = 1.2 Hz, <sup>3</sup>J<sub>PtH</sub> = 22.5 Hz, 1H), 9.08–8.84 (m, 3H), 8.33 (d, <sup>3</sup>J<sub>HH</sub> = 3.3 Hz, 1H), 7.92 (t, <sup>3</sup>J<sub>HH</sub> = 7.7 Hz, 1H), 7.53–7.41 (m, 2H), 7.12 (d, <sup>4</sup>J<sub>HH</sub> = 2.7 Hz, 2H), 6.70 (dd, <sup>3</sup>J<sub>HH</sub> = 8.4, <sup>4</sup>J<sub>HH</sub> = 2.7 Hz, 1H), 6.25 (d, <sup>3</sup>J<sub>HH</sub> = 8.4 Hz, <sup>3</sup>J<sub>PtH</sub> = 44.4 Hz, 1H), 3.81 (s, 3H). <sup>13</sup>C{<sup>1</sup>H} NMR (JMOD, 75 MHz, CDCl<sub>3</sub>): 156.7 (C), 153.6 (CH), 143.8 (CH), 143.5 (CH), 142.4 (C), 140.8 (CH), 137.9 (CH), 133.8 (C), 131.5 (CH, <sup>2</sup>J<sub>PtC</sub> = 71 Hz), 125.9 (CH, <sup>2</sup>J<sub>PtC</sub> = 51.6 Hz), 120.3 (C), 117.1 (CH), 109.5 (CH, <sup>2</sup>J<sub>PtC</sub> = 46.2 Hz), 55.2 (OCH<sub>3</sub>). HRMS (ESI) *m/z* calculated for C<sub>16</sub>H<sub>14</sub>N<sub>3</sub>O<sup>35</sup>CINa<sup>195</sup>Pt [M+Na]<sup>+</sup>: 517.0365, found: 517.0371 (1 ppm).

**Complex 18:** Synthesized from K<sub>2</sub>PtCl<sub>4</sub> (100 mg, 0.24 mmol), ligand **34** (94 mg, 0.29 mmol) and pyridine (48 mg, 0.05 ml, 0.6 mmol) following the general procedure for the synthesis of Pt<sup>II</sup> complexes. The complex **18** was obtained as an orange powder. Yield: 17 % (25 mg). NMR ( $\delta$  (ppm), CDCl<sub>3</sub>): <sup>1</sup>H (300 MHz): 9.66 (dd, <sup>3</sup>J<sub>HH</sub> = 3.3 Hz, <sup>5</sup>J<sub>HH</sub> = 1.3 Hz, <sup>3</sup>J<sub>PtH</sub>

= 38.7 Hz, 1H), 8.97 (d,  $^3J_{\text{HH}} = 6.6$  Hz,  $^3J_{\text{PtH}} = 42.3$  Hz, 2H), 8.76 (s, 1H), 8.36 (d,  $^3J_{\text{HH}} = 3.3$  Hz, 1H), 7.91 (tt,  $^3J_{\text{HH}} = 7.8$  Hz,  $^4J_{\text{HH}} = 1.6$  Hz, 1H), 7.46 (td,  $^3J_{\text{HH}} = 6.5$  Hz,  $^4J_{\text{HH}} = 1.5$  Hz, 2H), 7.39 (d,  $^4J_{\text{HH}} = 2.4$  Hz, 1H), 7.29–7.19 (m, 4H), 7.13–7.05 (m, 4H), 7.04–6.95 (m, 2H), 6.87 (dd,  $^3J_{\text{HH}} = 8.3$  Hz,  $^4J_{\text{HH}} = 2.4$  Hz, 1H), 6.29 (d,  $^3J_{\text{HH}} = 8.3$  Hz,  $^3J_{\text{PtH}} = 44.1$  Hz, 1H);  $^{13}\text{C}\{1\text{H}\}$  NMR (JMOD, 75 MHz,  $\text{CDCl}_3$ ): 161.0 (C), 153.6 (CH), 147.3 (C), 144.2 (C), 143.7 (CH), 143.4 (CH), 142.8 (C), 141.0 (CH), 137.9 (CH), 137.3 (C), 131.7 (CH,  $^2J_{\text{PtC}} = 68$  Hz), 129.0 (CH), 128.1 (CH), 125.9 (CH,  $^2J_{\text{PtC}} = 54$  Hz), 123.3 (CH), 122.3 (CH), 120.6 (CH). HRMS (ESI)  $m/z$  calculated for  $\text{C}_{27}\text{H}_{21}\text{N}_4^{35}\text{ClNa}^{195}\text{Pt}$   $[\text{M}+\text{Na}]^+$ : 654.0994, found: 654.0991(1 ppm).

**Complex 19:** Synthesized from  $\text{K}_2\text{PtCl}_4$  (100 mg, 0.24 mmol), ligand **33** (68 mg, 0.29 mmol) and pyridine (48 mg, 0.05 ml, 0.6 mmol) following the general procedure for the synthesis of  $\text{Pt}^{\text{II}}$  complexes. The complex **19** was obtained as an orange powder. Yield: 13 % (17 mg). NMR ( $\delta$  (ppm),  $\text{CDCl}_3$ ):  $^1\text{H}$  (300 MHz): 9.68 (d,  $^3J_{\text{HH}} = 3.4$  Hz,  $^5J_{\text{HH}} = 1.1$  Hz,  $^3J_{\text{PtH}} = 40.8$  Hz, 1H), 9.14–8.85 (m, 3H), 8.40 (d,  $^3J_{\text{HH}} = 3.4$  Hz, 1H), 7.95 (t,  $^3J_{\text{HH}} = 7.8$  Hz, 1H), 7.78 (d,  $^4J_{\text{HH}} = 2.0$  Hz, 1H), 7.65–7.55 (m, 2H), 7.54–7.27 (m, 6H), 6.47 (d,  $^3J_{\text{HH}} = 8.1$  Hz,  $^3J_{\text{PtH}} = 43.2$  Hz, 1H);  $^{13}\text{C}\{1\text{H}\}$  NMR (JMOD, 75 MHz,  $\text{CDCl}_3$ ): 155.2(C), 153.6(CH), 145.9(CH), 144.9(CH), 142.3(C), 134.0(C), 134.5(C), 131.0(CH), 129.7(CH), 129.5(CH), 128.7(CH), 127.6(CH), 127.0(CH), 126.4(CH), 125.8(CH), 122.5(CH). HRMS (ESI)  $m/z$  calculated for  $\text{C}_{21}\text{H}_{16}\text{N}_3^{35}\text{ClNa}^{195}\text{Pt}$   $[\text{M}+\text{Na}]^+$ : 563.0573, found: 563.0583 (2 ppm).

**Complex 20:** Synthesized from  $\text{K}_2\text{PtCl}_4$  (100 mg, 0.24 mmol), ligand **35** (93 mg, 0.29 mmol) and pyridine (48 mg, 0.05 ml, 0.6 mmol) following the general procedure for the synthesis of  $\text{Pt}^{\text{II}}$  complexes. The complex **20** was obtained as a yellow powder. Yield: 16 % (25 mg). NMR ( $\delta$  (ppm),  $\text{CDCl}_3$ ):  $^1\text{H}$  (300 MHz):  $^1\text{H}$  NMR (300 MHz,  $\text{CDCl}_3$ ) 9.75 (dd,  $^3J_{\text{HH}} = 3.3$  Hz,  $^5J_{\text{HH}} = 1.3$  Hz,  $^3J_{\text{PtH}} = 39.6$  Hz, 1H), 9.03 - 8.94 (m, 3H), 8.47 (d,  $^3J_{\text{HH}} = 3.3$  Hz, 1H), 8.15 (d,  $^3J_{\text{HH}} = 7.7$  Hz, 2H), 7.98 (t,  $^3J_{\text{HH}} = 7.8$  Hz, 1H), 7.78 (d,  $^4J_{\text{HH}} = 2.2$  Hz, 1H), 7.60–7.48 (m, 2H), 7.45–7.28 (m, 7H), 6.64 (d,  $^3J_{\text{HH}} = 7.9$  Hz,  $^3J_{\text{PtH}} = 45$  Hz, 1H).  $^{13}\text{C}\{1\text{H}\}$  NMR (JMOD, 75 MHz,  $\text{CDCl}_3$ ): 153.6 (CH), 149.1 (C), 146.9 (CH), 144.1(CH), 143.9 (CH), 142.6 (C), 141.0 (CH), 140.7 (C), 138.2 (CH), 133.6 (C), 132.7 (CH), 132.2 (CH), 130.8 (C), 129.9 (CH), 126.1 (CH), 125.7 (CH), 123.0 (C), 122.6 (CH), 120.1 (CH), 119.7 (CH), 109.3 (CH); HRMS (ESI)  $m/z$  calculated for  $\text{C}_{27}\text{H}_{19}\text{N}_4^{35}\text{ClNa}^{195}\text{Pt}$   $[\text{M}+\text{Na}]^+$ : 652.0838, found: 652.0848 (2 ppm).

**Complex 21:** Synthesized from  $\text{K}_2\text{PtCl}_4$  (100 mg, 0.24 mmol), ligand **36** (70 mg, 0.29 mmol) and pyridine (48 mg, 0.05 ml, 0.6 mmol) following the general procedure for the synthesis of  $\text{Pt}^{\text{II}}$  complexes. The complex **21** was obtained as a red powder. Yield: 35% (56 mg). NMR ( $\delta$  (ppm),  $\text{CDCl}_3$ ):  $^1\text{H}$  (300 MHz): 10.28 (s,  $^3J_{\text{PtH}} = 20.1$  Hz, 1H), 9.04 (dd,  $^3J_{\text{HH}} =$

6.3 Hz,  $^4J_{\text{HH}} = 1.5$  Hz,  $^3J_{\text{PtH}} = 45.9$  Hz, 2H), 8.71 (d,  $^3J_{\text{HH}} = 8.1$  Hz, 1H), 8.21–8.02 (m, 1H), 8.02–7.89 (m, 2 H), 7.79–7.67 (m, 2 H), 7.53–7.41 (m, 2H), 6.79 (dd,  $^3J_{\text{HH}} = 8.5$  Hz,  $^4J_{\text{HH}} = 2.7$  Hz, 1H), 6.42 (d,  $^3J_{\text{HH}} = 8.5$  Hz,  $^3J_{\text{PtH}} = 31.8$  Hz, 1H), 3.83 (s, 3H).  $^{13}\text{C}\{^1\text{H}\}$  NMR (JMOD, 75 MHz,  $\text{CDCl}_3$ ): 156.0 (C), 153.7 (CH), 151.1 (C), 148.5 (C), 144.6 (C), 138.5 (CH), 137.7 (C), 134.9 (CH), 131.6 (CH), 129.2 (CH), 128.4 (CH), 125.9 (CH), 125.5 (CH), 124.4 (CH), 120.5 (C), 118.2 (CH), 117.2 (CH), 55.4 ( $\text{OCH}_3$ ). HRMS (ESI)  $m/z$  calculated for  $\text{C}_{20}\text{H}_{16}\text{N}_3\text{O}^{35}\text{ClNa}^{195}\text{Pt}$   $[\text{M}+\text{Na}]^+$ : 567.0522, found: 567.0522 (0 ppm).

**Complex 22:** Synthesized from  $\text{K}_2\text{PtCl}_4$  (100 mg, 0.24 mmol), ligand **36** (70 mg, 0.29 mmol) and 4-methoxypyridine (66 mg, 0.07 ml, 0.6 mmol) following the general procedure for the synthesis of  $\text{Pt}^{\text{II}}$  complexes. The complex **22** was obtained as a red powder. Yield: 45% (64 mg). NMR ( $\delta$  (ppm),  $\text{CDCl}_3$ ):  $^1\text{H}$  (300 MHz): 10.20 (s, 1H), 8.84 (d,  $^3J_{\text{HH}} = 5.7$  Hz,  $^3J_{\text{PtH}} = 42.9$  Hz, 2H), 8.62 (d,  $^3J_{\text{HH}} = 8.6$  Hz, 1H), 8.05 (d,  $^3J_{\text{HH}} = 8.6$  Hz, 1H), 7.92 (t,  $^3J_{\text{HH}} = 6.9$  Hz, 1H), 7.69 (t,  $^3J_{\text{HH}} = 8.4$  Hz, 1H), 7.58 (d,  $^4J_{\text{HH}} = 2.7$  Hz, 1H), 6.95 (d,  $^3J_{\text{HH}} = 7.1$  Hz, 2H), 6.68 (dd,  $^3J_{\text{HH}} = 9.1$  Hz,  $^4J_{\text{HH}} = 3.2$  Hz, 1H), 6.43 (d,  $^3J_{\text{HH}} = 8.5$  Hz,  $^3J_{\text{PtH}} = 54.6$  Hz, 1H), 3.95 (s, 3H), 3.75 (s, 3H);  $^{13}\text{C}\{^1\text{H}\}$  NMR (JMOD, 75 MHz,  $\text{CDCl}_3$ ): 166.1 (C), 155.9 (C), 154.1 (CH), 150.9 (C), 137.6 (C), 134.7 (CH), 131.6 (CH), 129.4 (C), 128.3 (CH), 128.2 (CH), 125.4 (CH), 117.8 (CH), 117.7 (C), 116.9 (CH), 116.0 (C), 111.8 (CH), 55.8 ( $\text{CH}_3$ ), 55.2 ( $\text{OCH}_3$ ). HRMS (ESI)  $m/z$  calculated for  $\text{C}_{21}\text{H}_{18}\text{N}_3\text{O}_2^{35}\text{ClNa}^{195}\text{Pt}$   $[\text{M}+\text{Na}]^+$ : 597.0627, found: 597.0627 (0 ppm).

**Complex 23:** Synthesized from  $\text{K}_2\text{PtCl}_4$  (100 mg, 0.24 mmol), ligand **37** (109 mg, 0.29 mmol) and pyridine (48 mg, 0.05 ml, 0.6 mmol) following the general procedure for the synthesis of  $\text{Pt}^{\text{II}}$  complexes. The complex **23** was obtained as a violet powder. Yield: 75 % (123 mg). NMR ( $\delta$  (ppm),  $\text{CDCl}_3$ ):  $^1\text{H}$  (300 MHz): 10.28 (s, 1H), 9.03 (d,  $^3J_{\text{HH}} = 6.3$  Hz,  $^4J_{\text{HH}} = 1.5$  Hz,  $^3J_{\text{PtH}} = 47.4$  Hz, 2H), 8.20 (d,  $^3J_{\text{HH}} = 7.8$  Hz, 1H), 8.06 (d,  $^3J_{\text{HH}} = 7.2$  Hz, 1H), 7.97–7.81 (m, 3H), 7.53–7.40 (m, 3H), 7.31–7.21 (m, 4H), 7.18–7.09 (m, 4H), 7.06–6.92 (m, 3H), 6.42 (d,  $^3J_{\text{HH}} = 8.4$  Hz,  $^3J_{\text{PtH}} = 45$  Hz, 1H);  $^{13}\text{C}\{^1\text{H}\}$  NMR (JMOD, 75 MHz,  $\text{CDCl}_3$ ): 153.7 (CH), 153.1 (CH), 151.0 (C), 147.4 (C), 144.6 (C), 143.8 (C), 137.8 (CH), 134.8 (CH), 134.3 (C), 132.2 (C), 131.7 (CH), 129.7 (CH), 128.3 (CH), 127.6 (CH), 125.9 (CH), 125.5 (CH), 124.1 (CH), 122.5 (CH), 120,3 (C); HRMS (ESI)  $m/z$  calculated for  $\text{C}_{31}\text{H}_{23}\text{N}_4^{35}\text{ClNa}^{195}\text{Pt}$   $[\text{M}+\text{Na}]^+$ : 704.1151, found: 704.1149 (0 ppm).

**Complex 24:** Synthesized from  $\text{K}_2\text{PtCl}_4$  (100 mg, 0.24 mmol), ligand **37** (109 mg, 0.29 mmol) and 4-methoxypyridine (66 mg, 0.07 ml, 0.6 mmol) following the general procedure for the synthesis of  $\text{Pt}^{\text{II}}$  complexes. The product **24** was obtained as a blue/violet powder. Yield: 65% (112 mg). NMR ( $\delta$  (ppm),  $\text{CDCl}_3$ ):  $^1\text{H}$  (300 MHz): 10.27 (s, 1H), 8.79 (d,  $^3J_{\text{HH}} = 5.7$  Hz,  $^3J_{\text{HH}} = 1.2$  Hz,  $^3J_{\text{PtH}} = 44.4$  Hz, 2H), 8.19 (d,  $^3J_{\text{HH}} = 7.7$  Hz, 1H), 8.05 (d,  $^3J_{\text{HH}} = 8.6$  Hz, 1H), 7.91–7.82 (m, 2H), 7.56–7.42 (t,  $^3J_{\text{HH}} = 8.4$  Hz, 1H), 7.32–7.20 (m, 4H), 7.18–7.10 (m, 4H), 7.05–6.89 (m, 5H), 6.51 (d,  $^3J_{\text{HH}} = 8.4$  Hz,  $^3J_{\text{PtH}} = 38.4$  Hz, 1H), 3.95 (s, 3H);  $^{13}\text{C}\{^1\text{H}\}$  NMR (JMOD, 75 MHz,  $\text{CDCl}_3$ ): 166.3 (C), 154.1 (CH), 150.9 (C), 147.4 (C), 144.7 (C), 143.9 (C), 139.8 (CH), 134.7 (CH), 133.4 (C), 132.5 (C), 131.1 (CH), 129.1 (CH), 128.3 (CH), 127.6 (CH), 125.4 (CH), 123.4 (CH), 122.4 (CH), 121.0 (C), 111.9 (CH), 55.8 ( $\text{OCH}_3$ ); HRMS (ESI)  $m/z$  calculated for  $\text{C}_{32}\text{H}_{25}\text{N}_4\text{O}^{195}\text{Pt}$   $[\text{M}+\text{Na}]^+$ : 676.1670, found: 676.1670 (0 ppm).

## NMR spectra



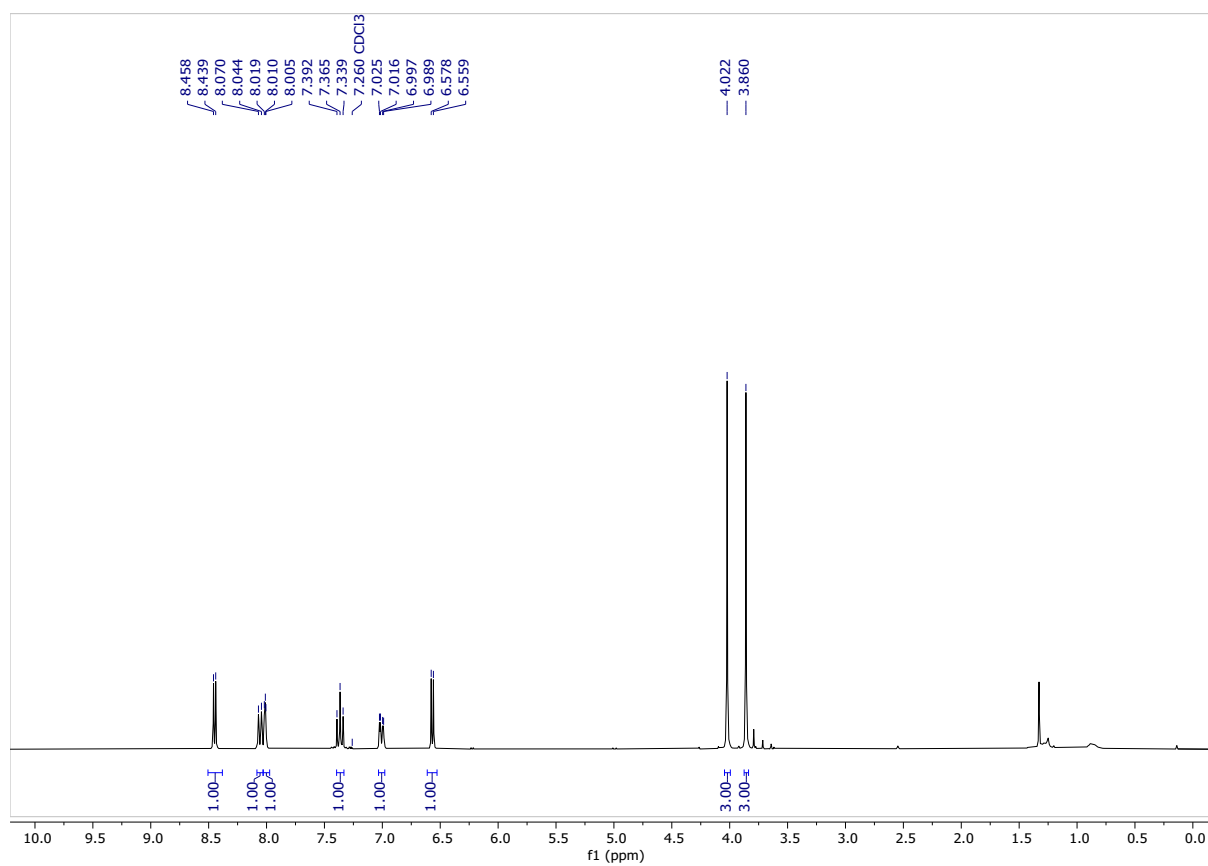

**Fig. S1.** <sup>1</sup>H NMR spectrum (300 MHz, CDCl<sub>3</sub>) of **26**.

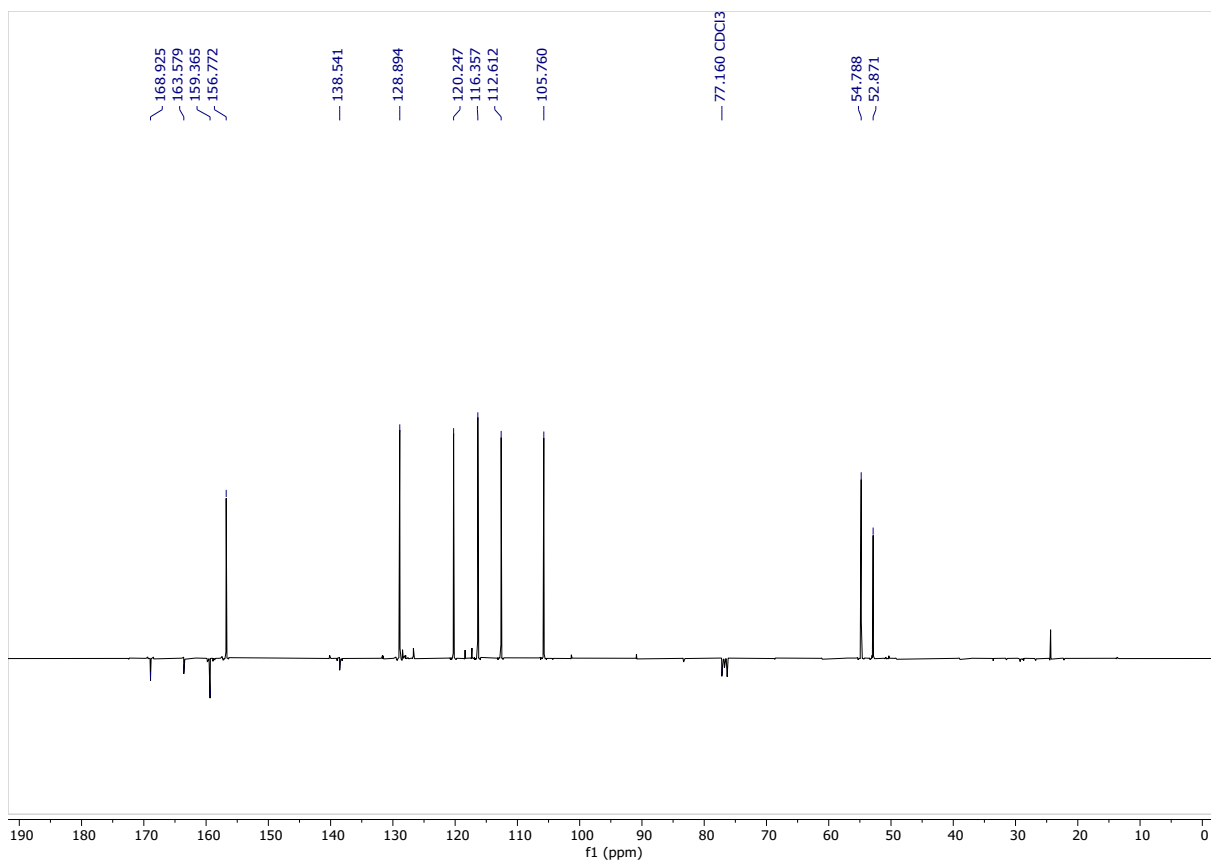

Fig. S2. <sup>13</sup>C NMR spectrum (75 MHz, CDCl<sub>3</sub>) of **26**.

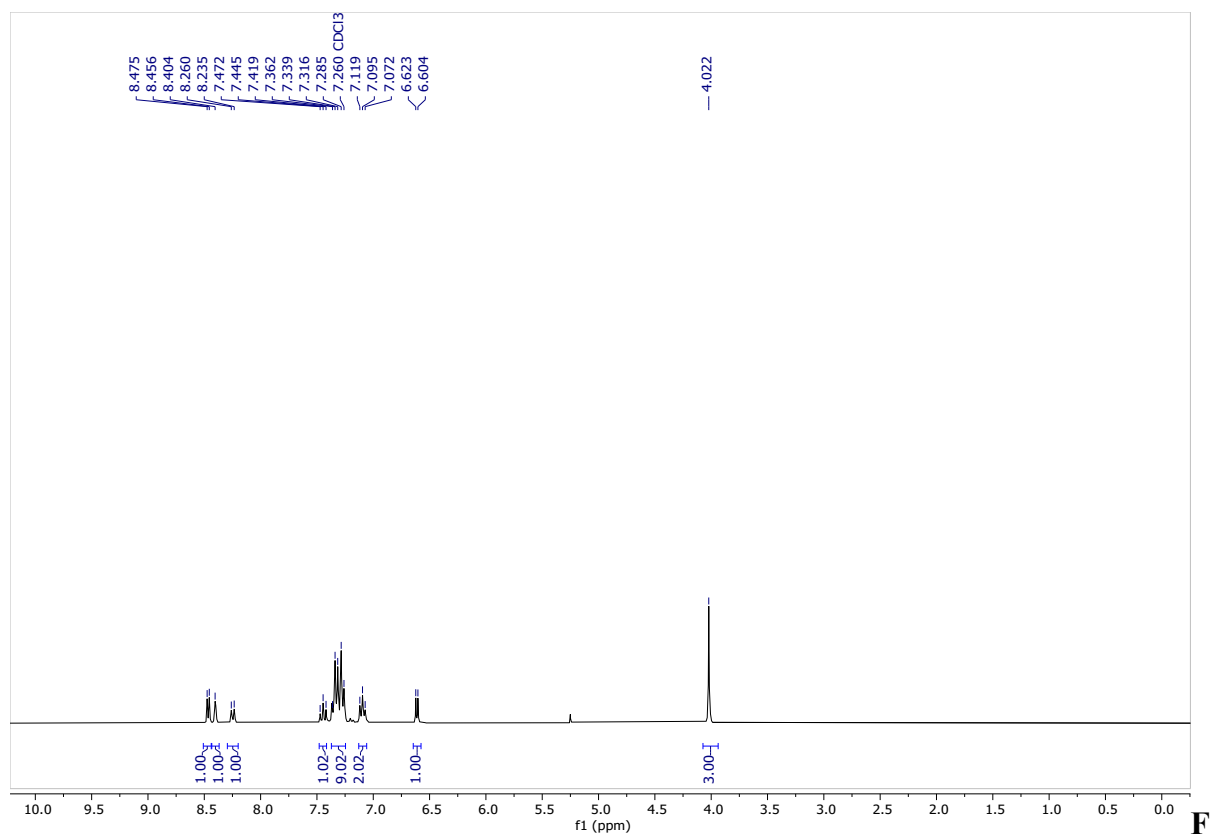

Fig. S3. <sup>1</sup>H NMR spectrum (300 MHz, CDCl<sub>3</sub>) of **29**.

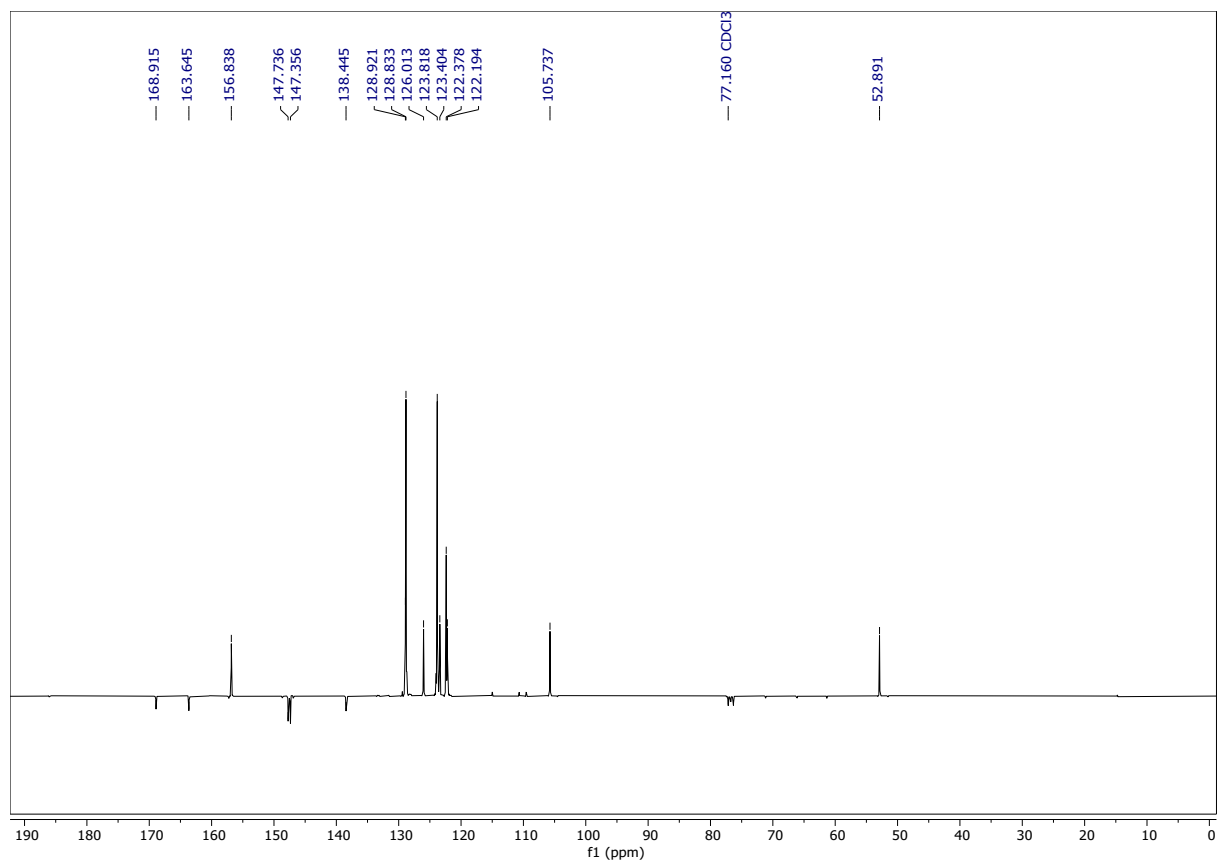

**Fig. S4.** <sup>13</sup>C NMR spectrum (75 MHz, CDCl<sub>3</sub>) of **29**.

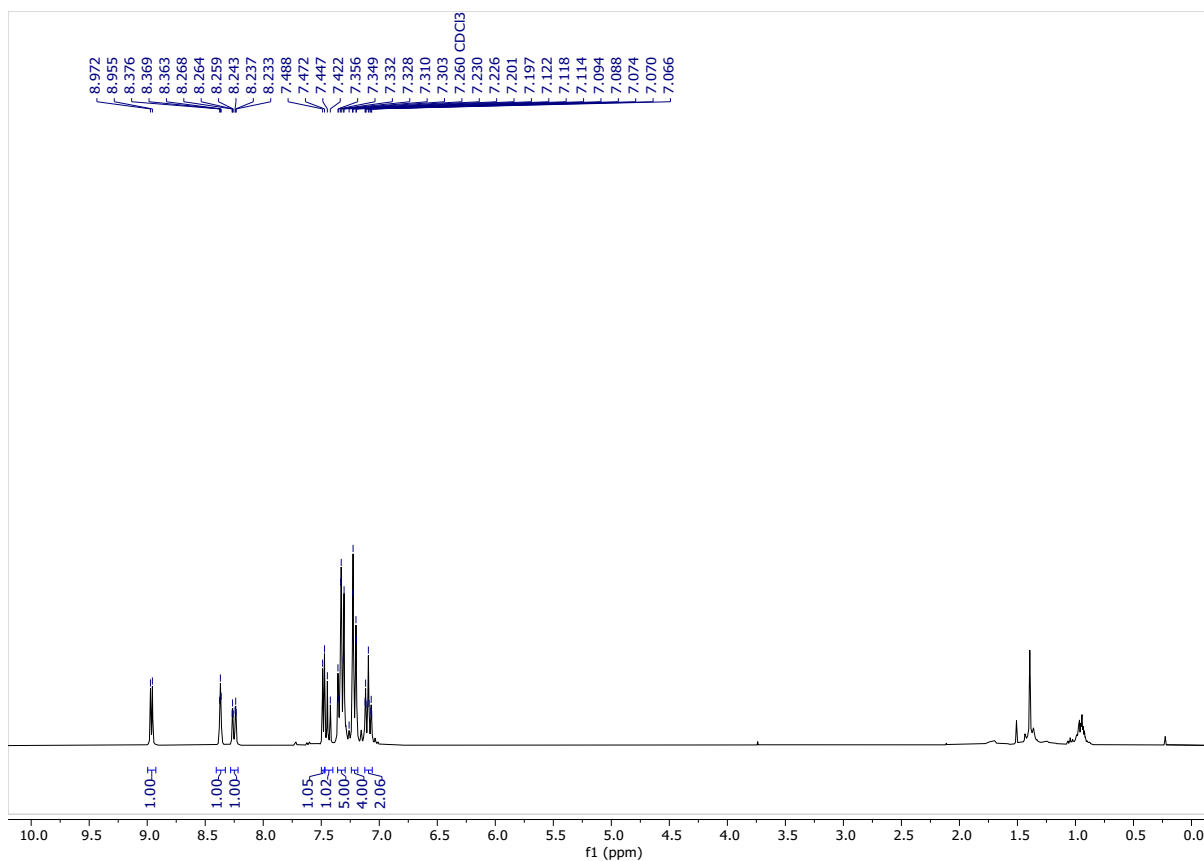

Fig. S5. <sup>1</sup>H NMR spectrum (300 MHz, CDCl<sub>3</sub>) of **30**.

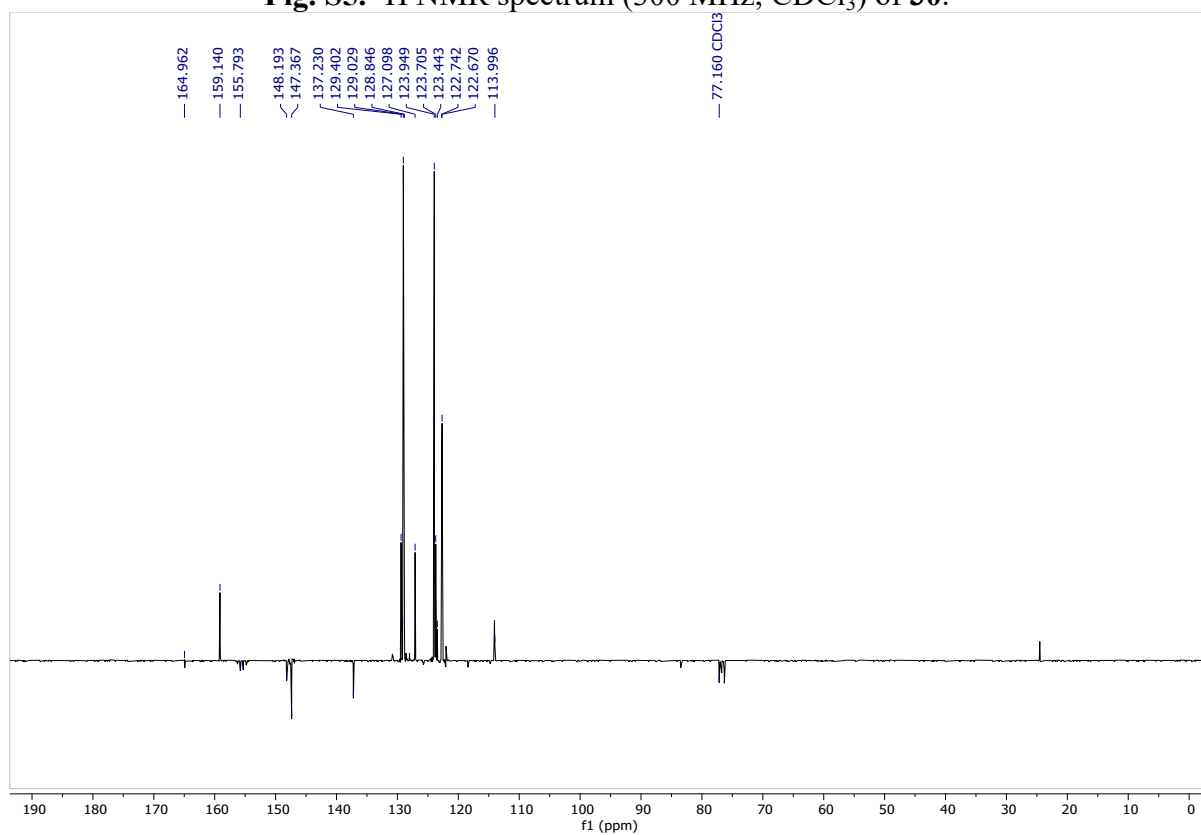

Fig. S6. <sup>13</sup>C NMR spectrum (75 MHz, CDCl<sub>3</sub>) of **30**.

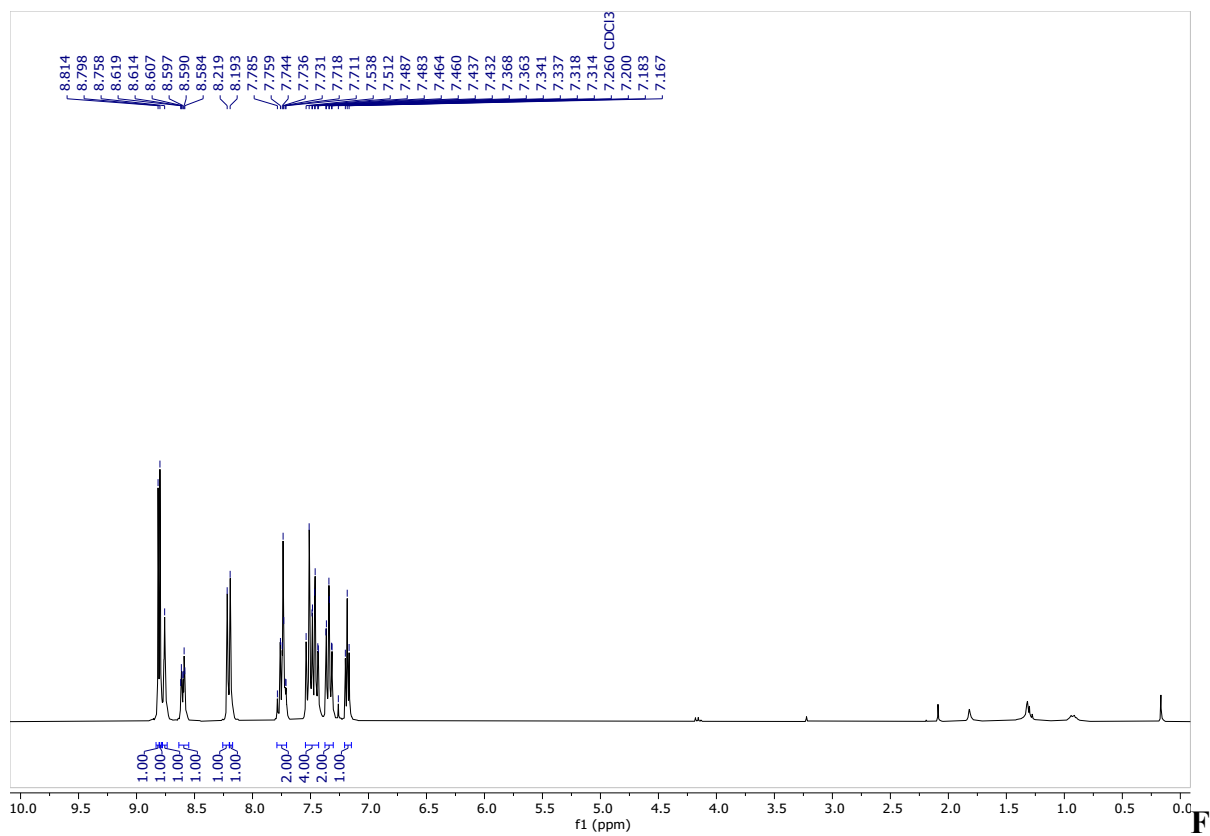

ig. S7. <sup>1</sup>H NMR spectrum (300 MHz, CDCl<sub>3</sub>) of 31.

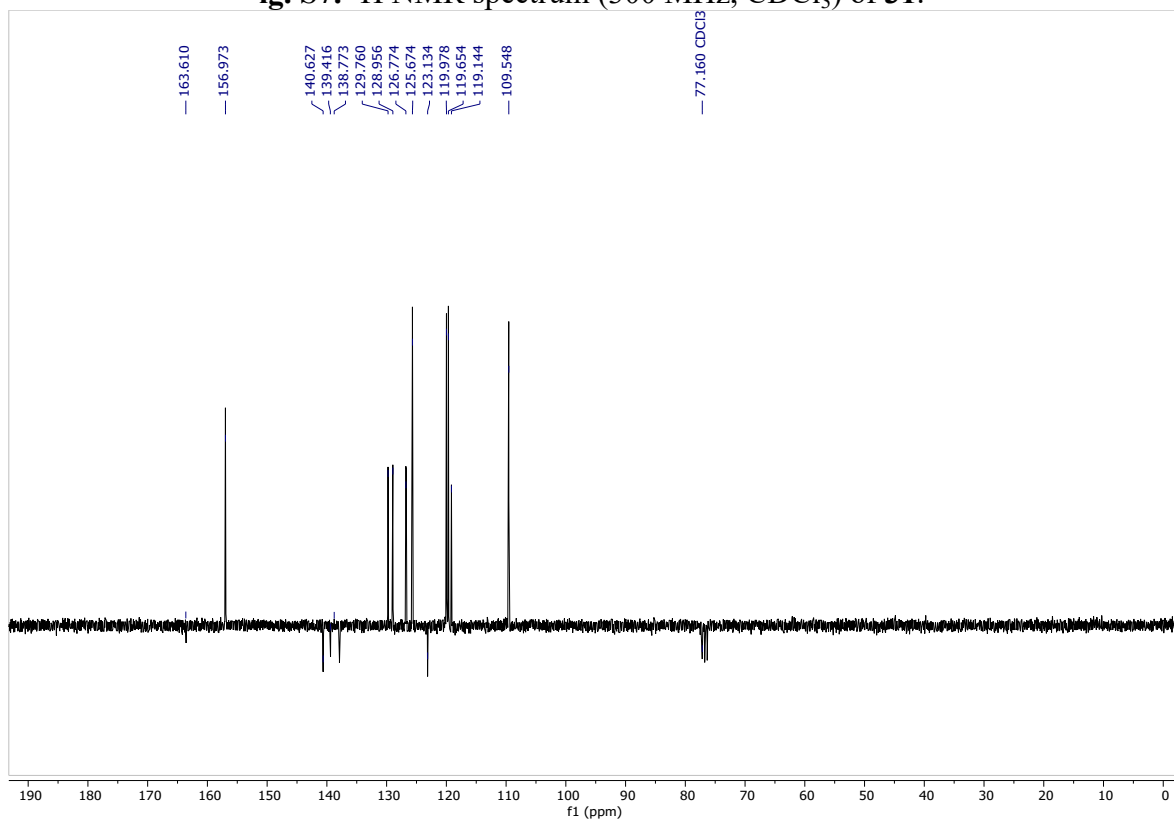

Fig. S8. <sup>13</sup>C NMR spectrum (75 MHz, CDCl<sub>3</sub>) of 31.

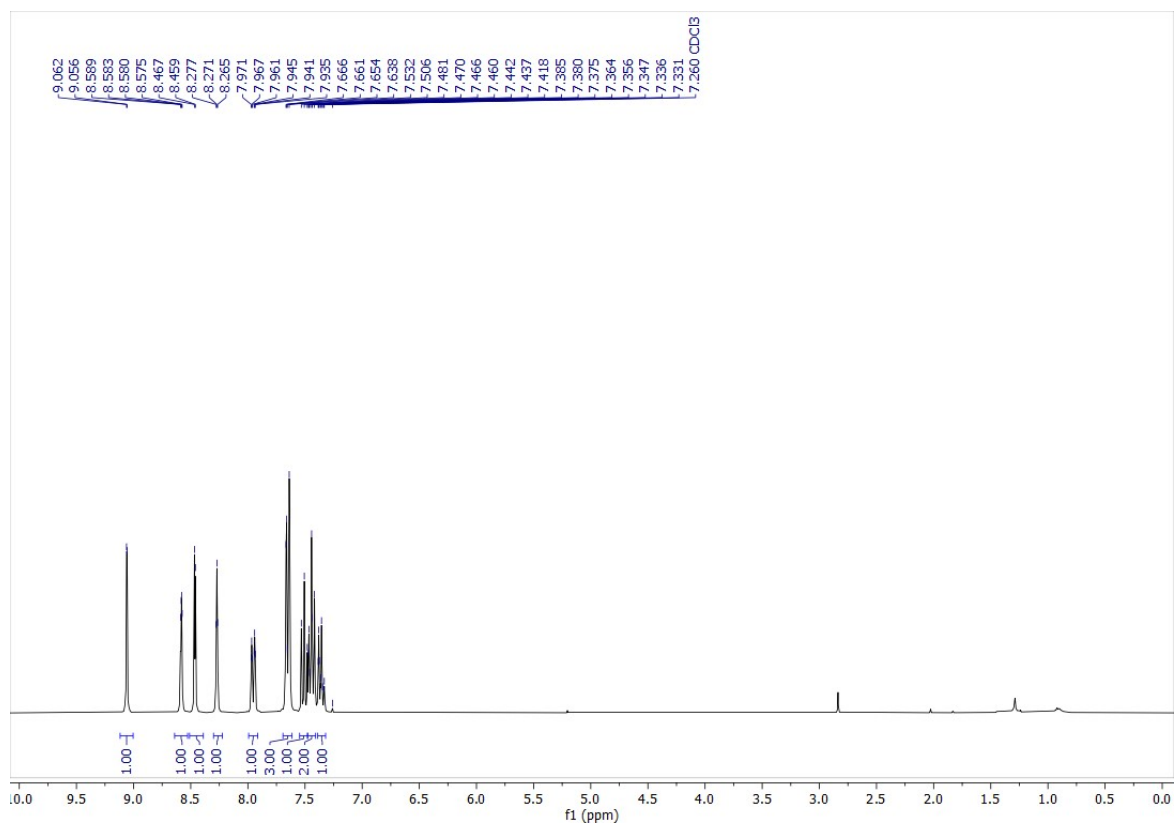

**Fig. S9.** <sup>1</sup>H NMR spectrum (300 MHz, CDCl<sub>3</sub>) of **33**.

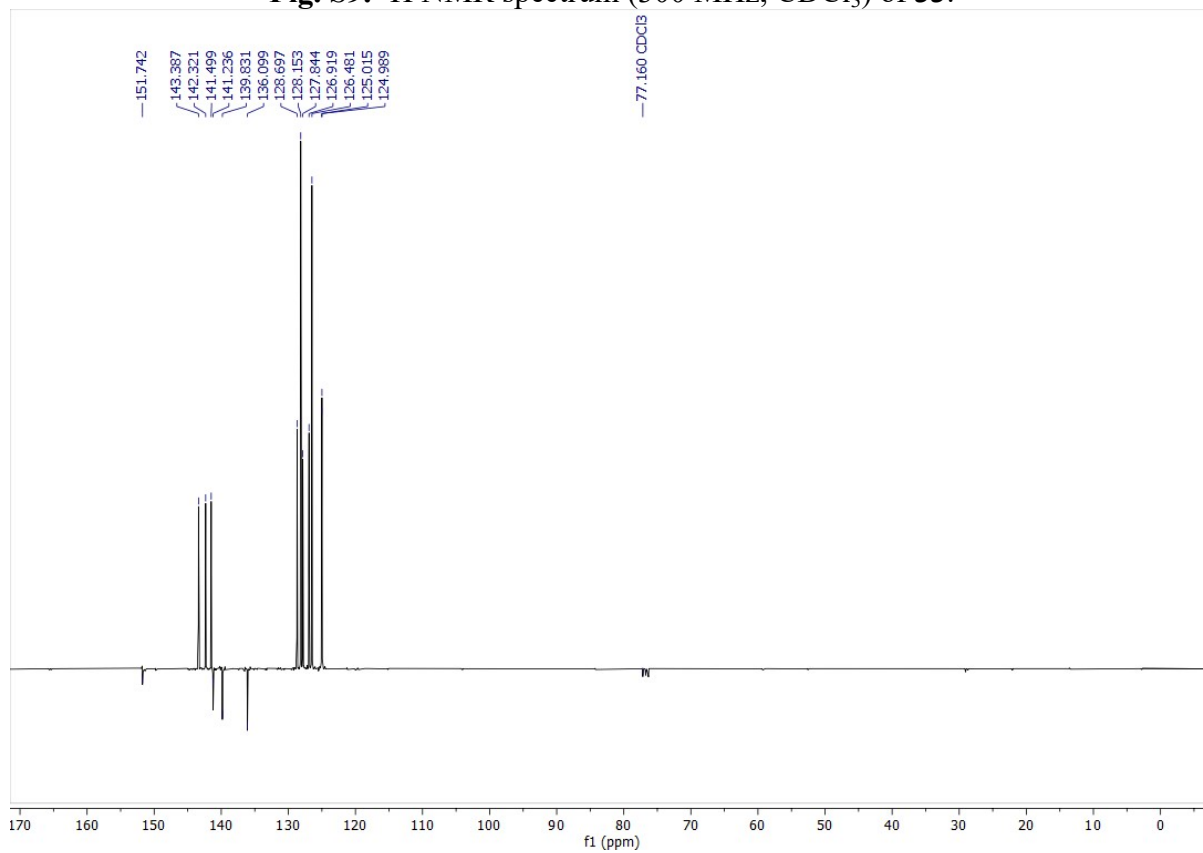

**Fig. S10.** <sup>13</sup>C NMR spectrum (75 MHz, CDCl<sub>3</sub>) of **33**.

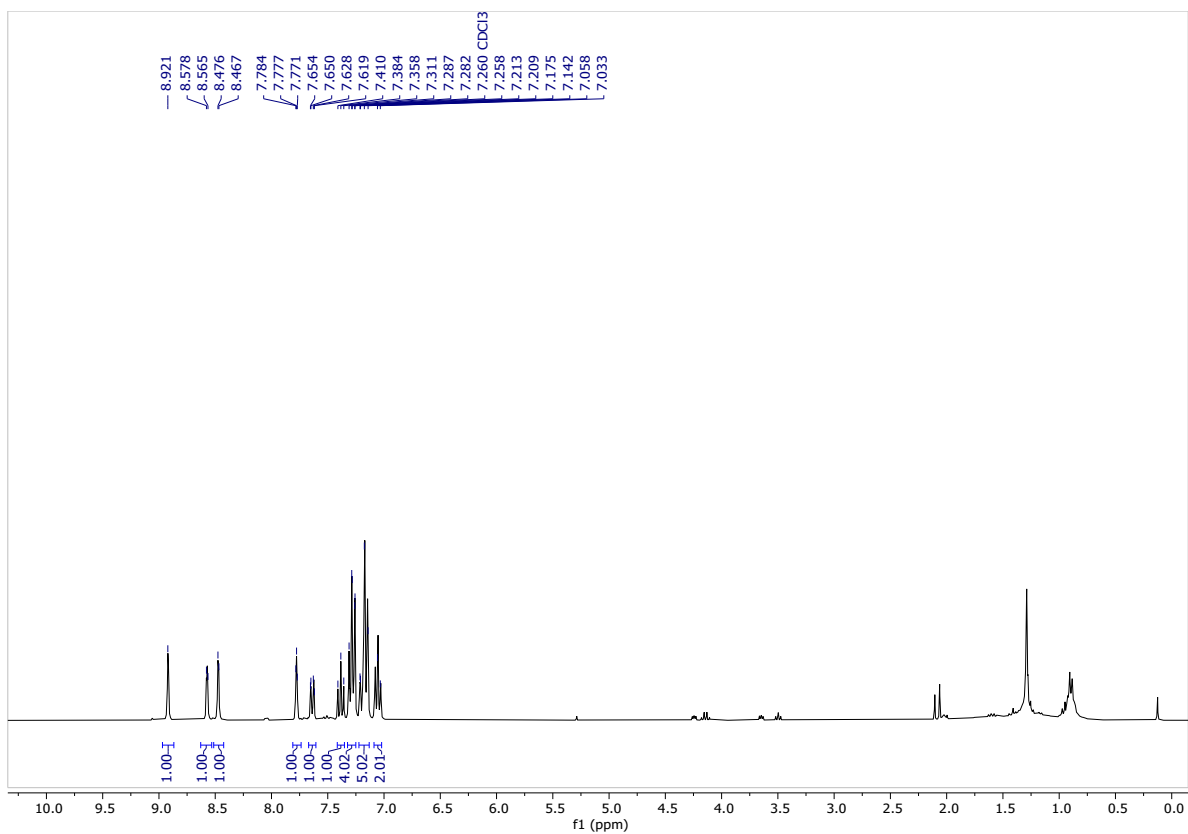

**Fig. S11.**  $^1\text{H}$  NMR spectrum (300 MHz,  $\text{CDCl}_3$ ) of **34**.

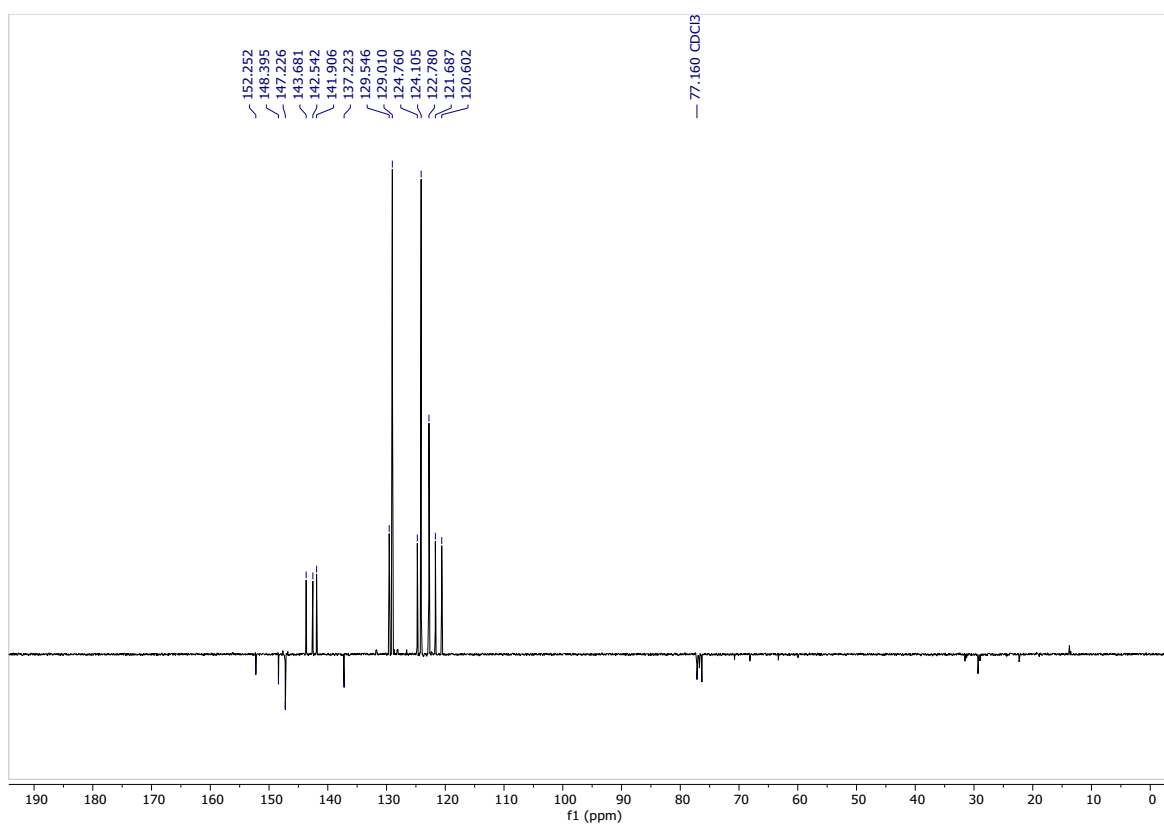

**Fig. S12.**  $^{13}\text{C}$  NMR spectrum (75 MHz,  $\text{CDCl}_3$ ) of **34**.

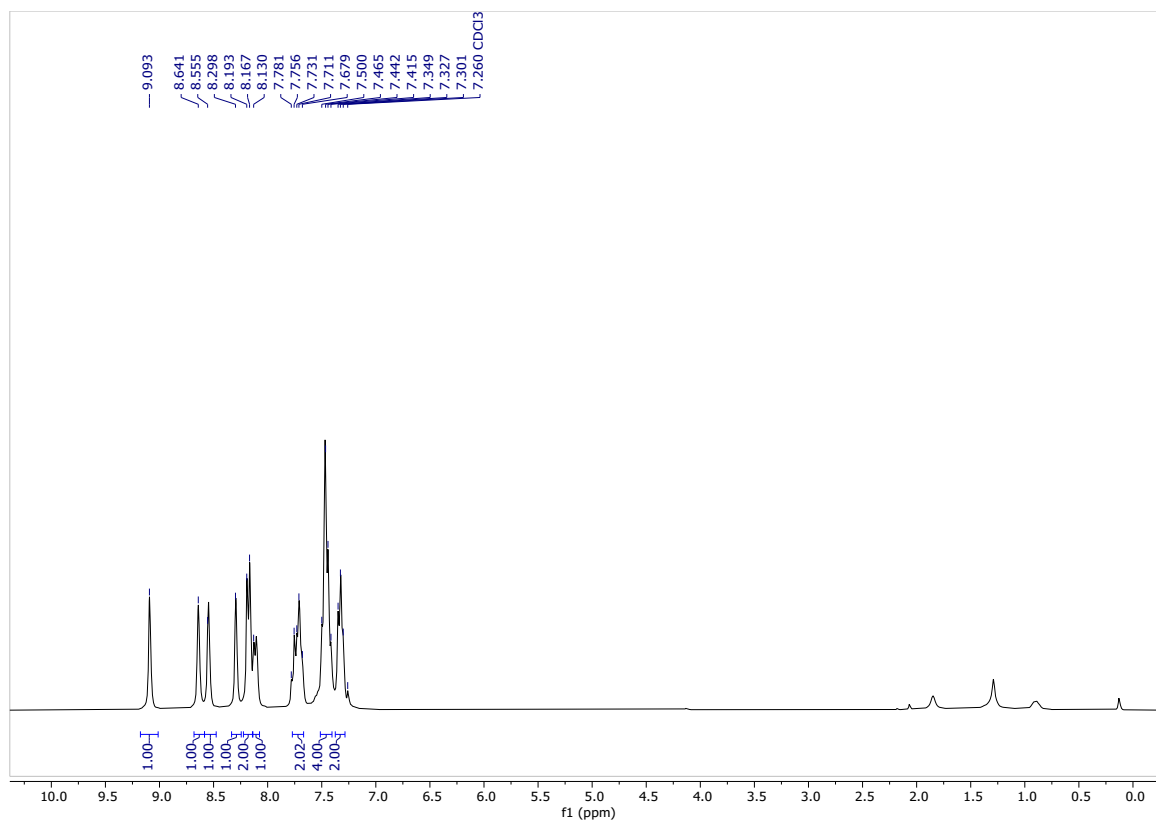

**Fig. S13.** <sup>1</sup>H NMR spectrum (300 MHz, CDCl<sub>3</sub>) of **35**.

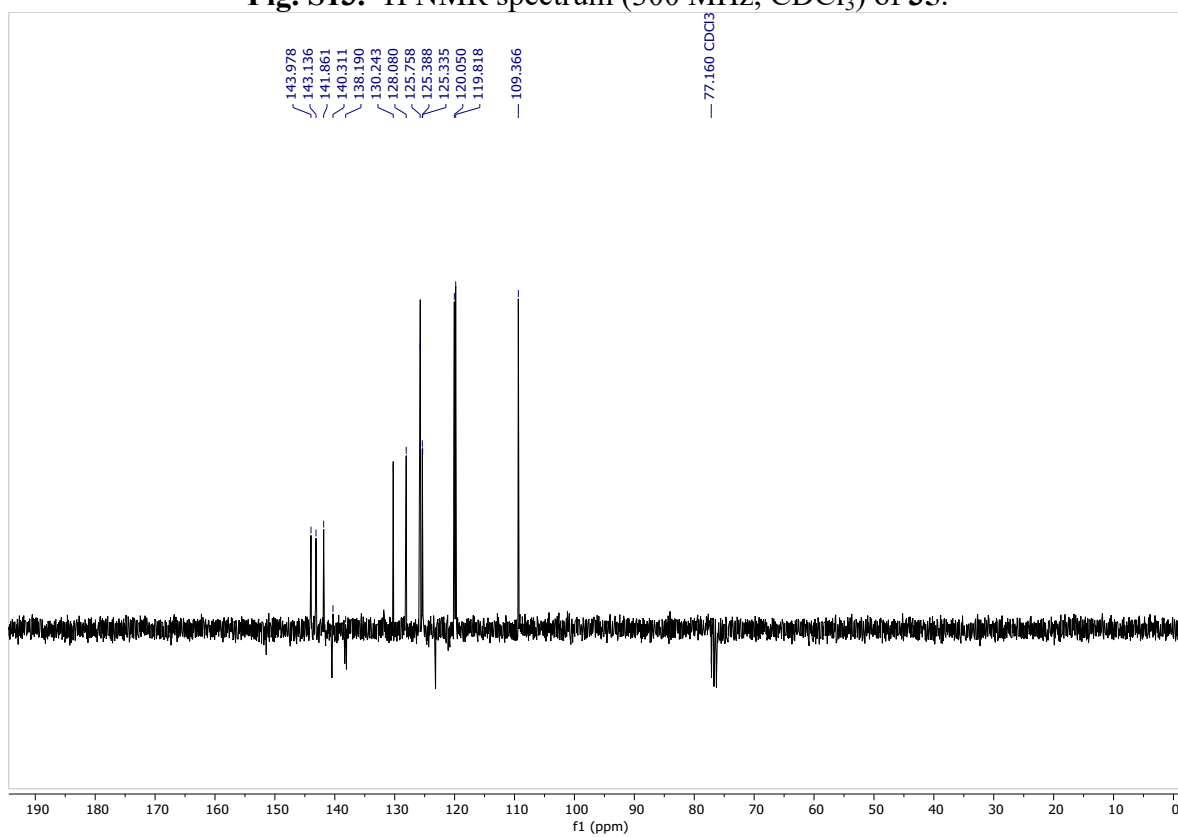

**Fig. S14.** <sup>13</sup>C NMR spectrum (75 MHz, CDCl<sub>3</sub>) of **35**.



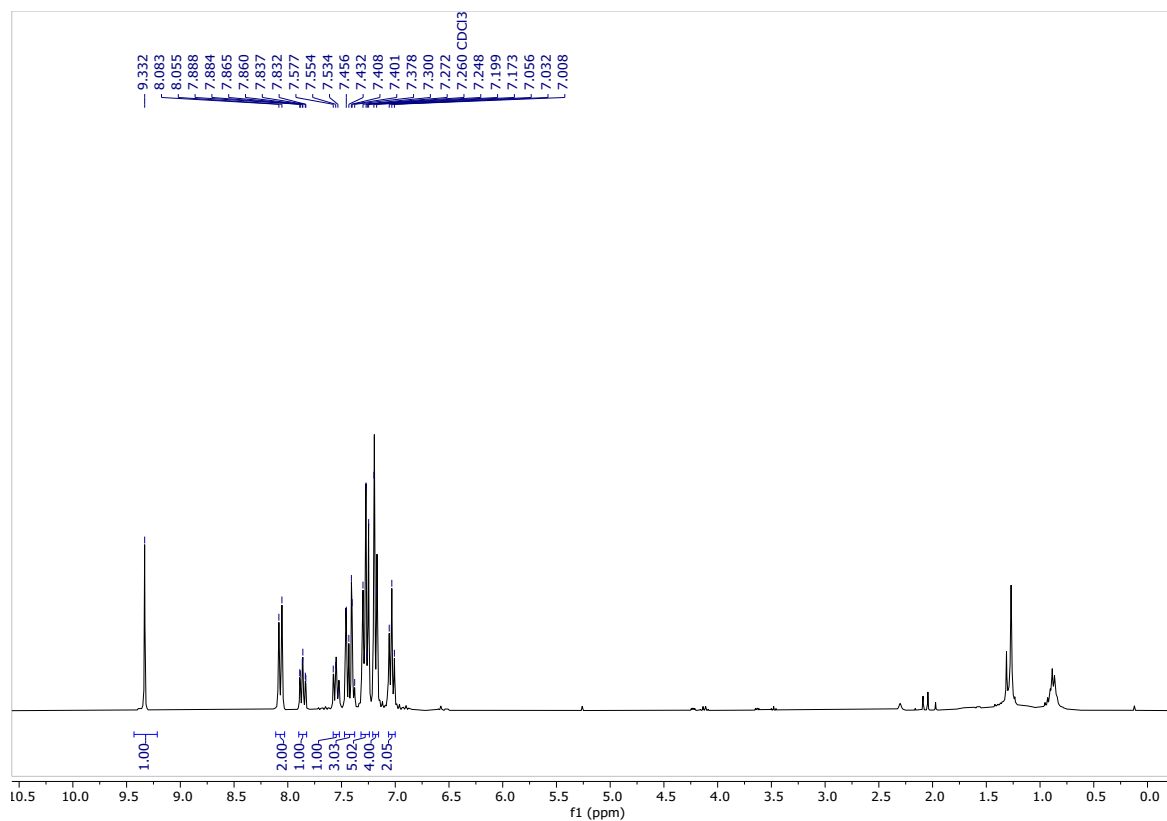

**Fig. S15.** <sup>1</sup>H NMR spectrum (300 MHz, CDCl<sub>3</sub>) of **37**.

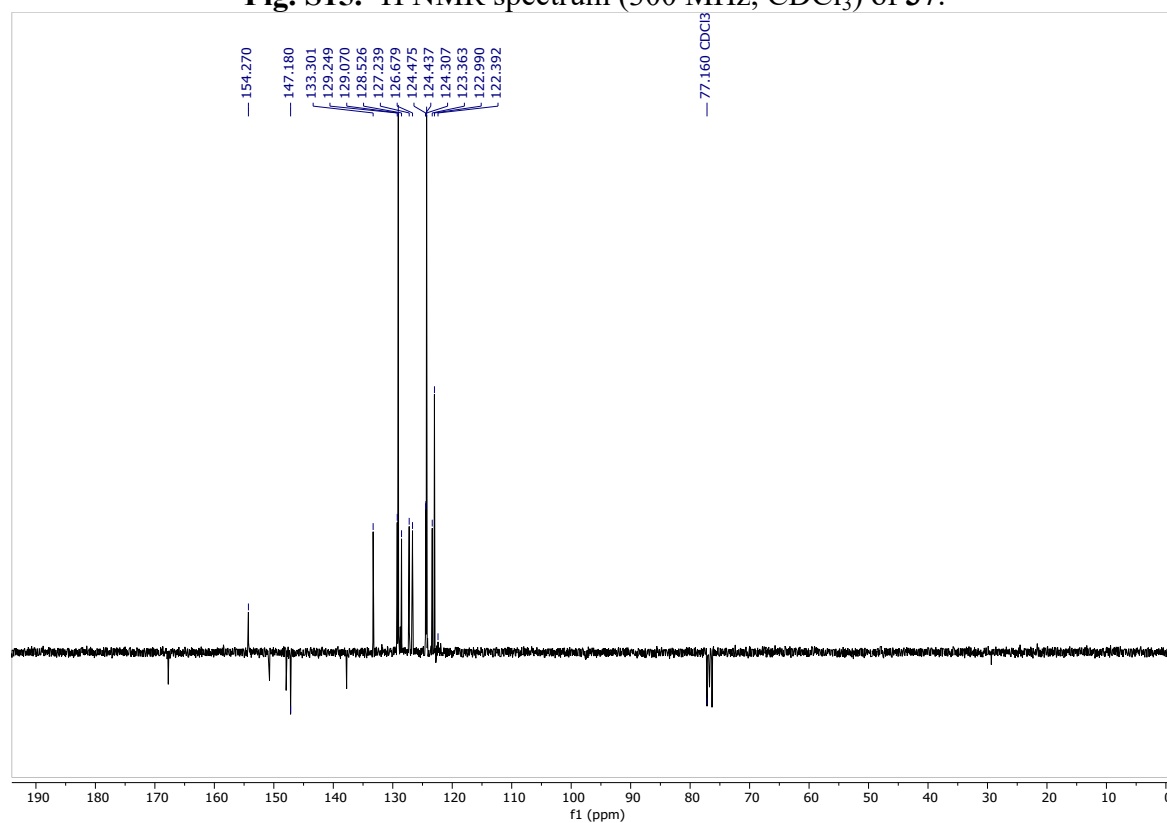

**Fig. S16.** <sup>13</sup>C NMR spectrum (75 MHz, CDCl<sub>3</sub>) of **37**.

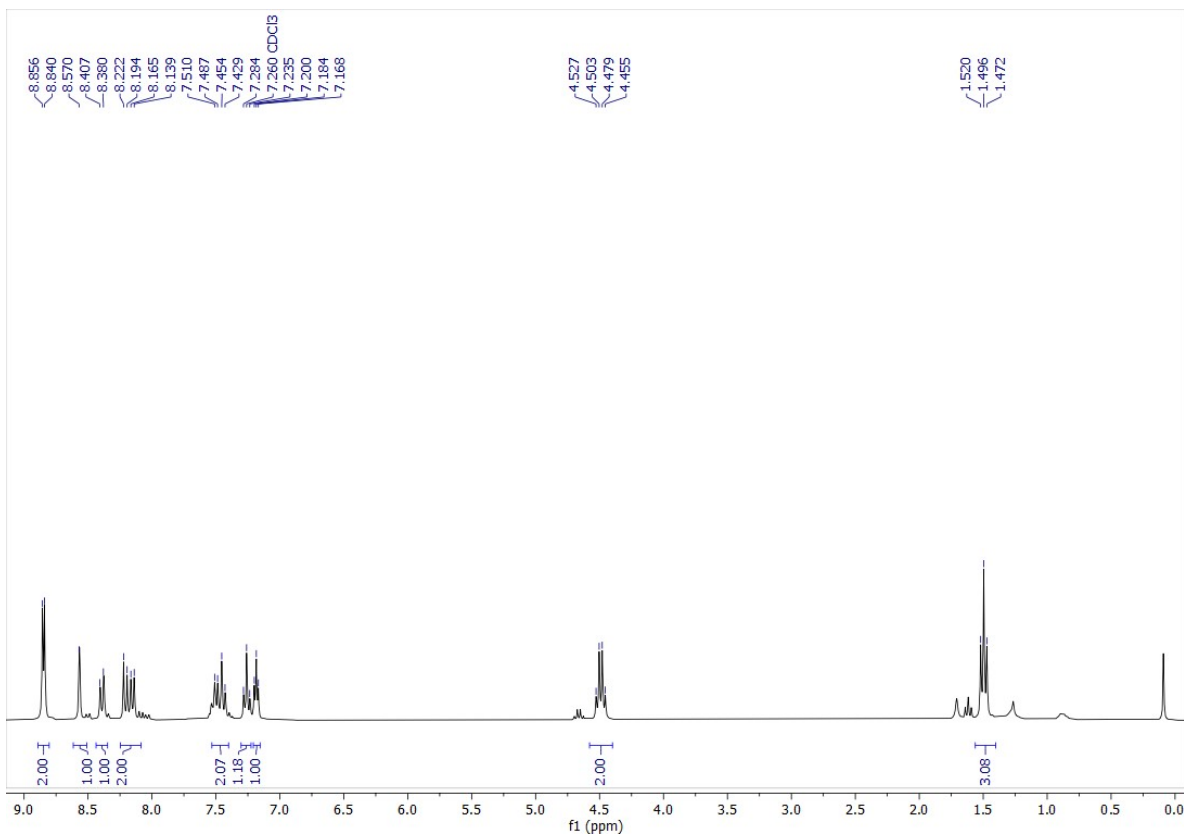

**Fig. S17.**  $^1\text{H}$  NMR spectrum (300 MHz,  $\text{CDCl}_3$ ) of **38**.

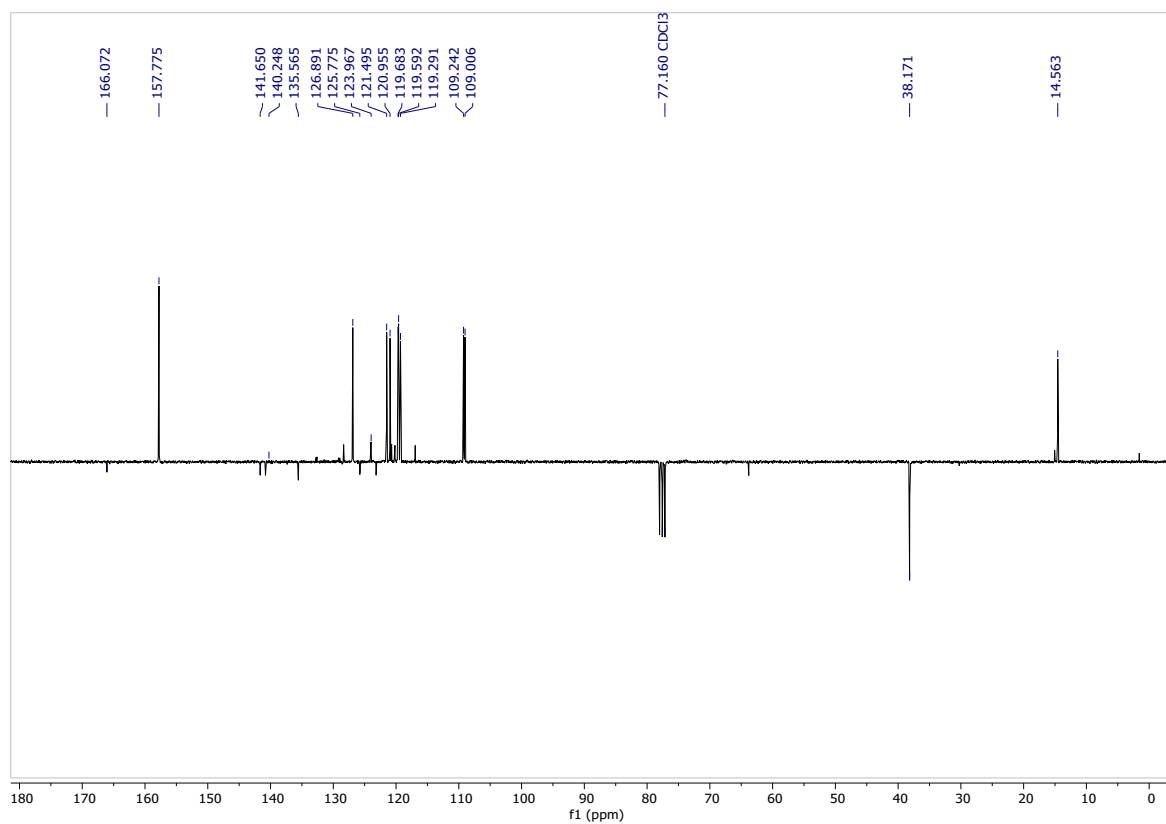

**Fig. S18.**  $^{13}\text{C}$  NMR spectrum (75 MHz,  $\text{CDCl}_3$ ) of **38**.

## Complex 2

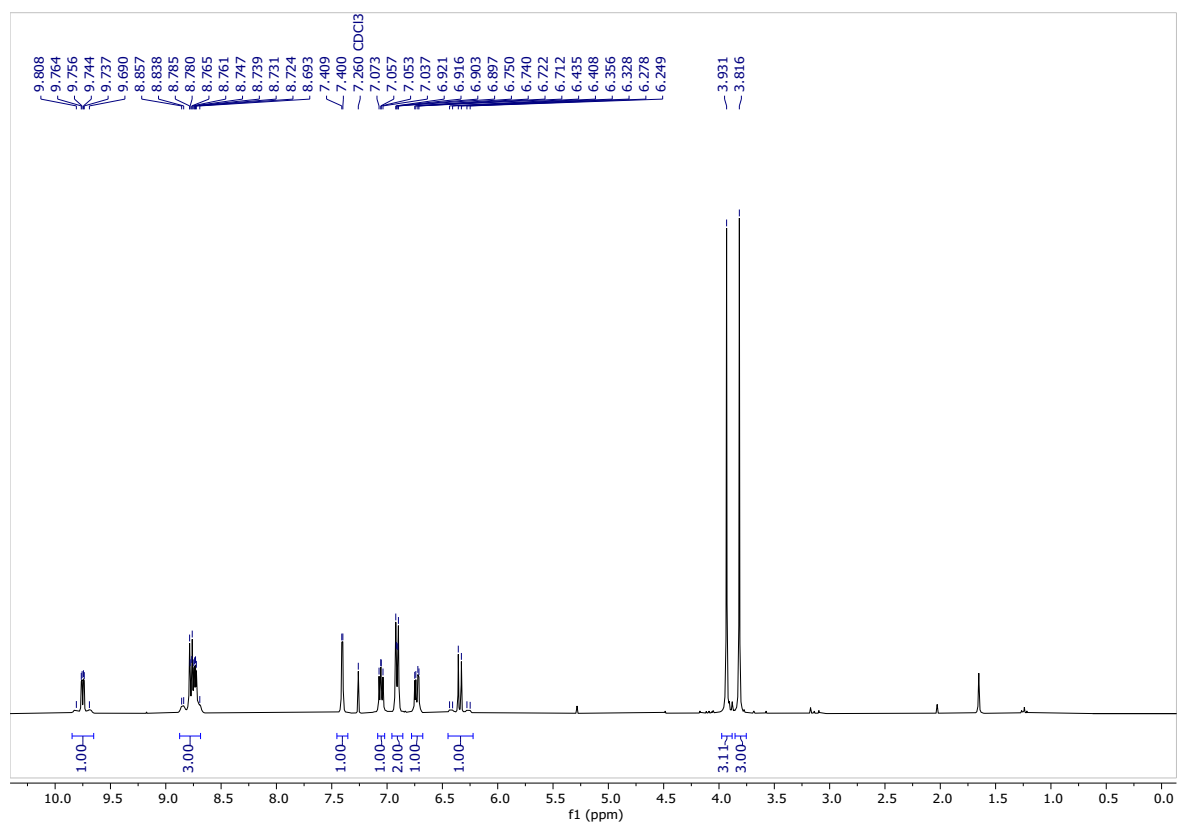

Fig. S19. <sup>1</sup>H NMR spectrum (300 MHz, CDCl<sub>3</sub>) of complex 2.

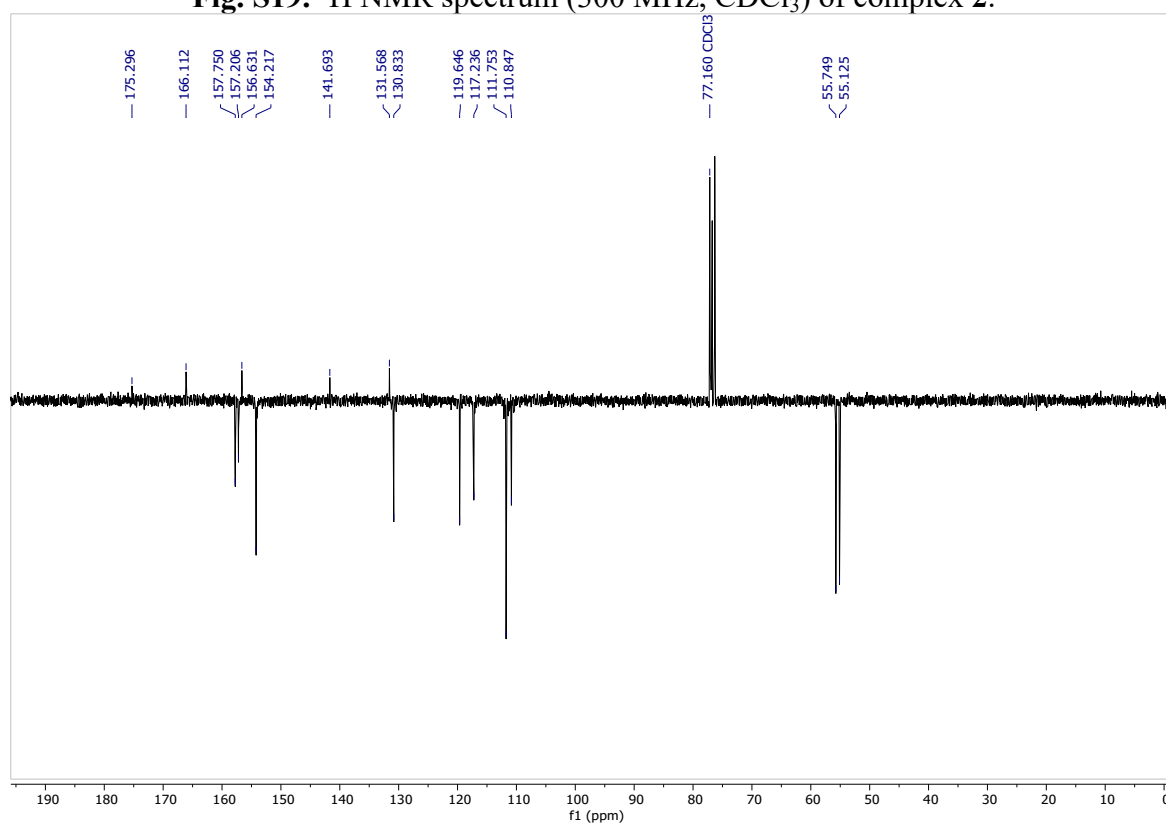

Fig. S20. <sup>13</sup>C NMR spectrum (75 MHz, CDCl<sub>3</sub>) of complex 2.

### Complex 3

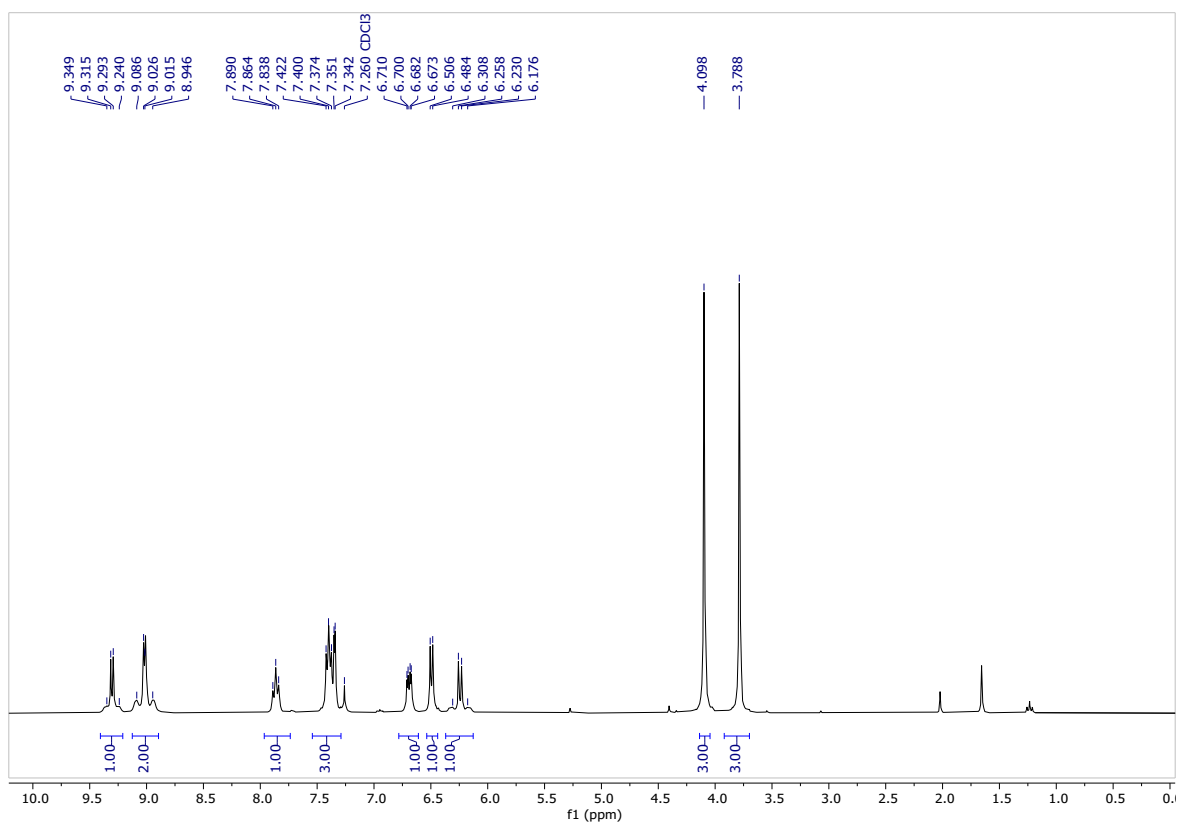

Fig. S21. <sup>1</sup>H NMR spectrum (300 MHz, CDCl<sub>3</sub>) of complex 3.

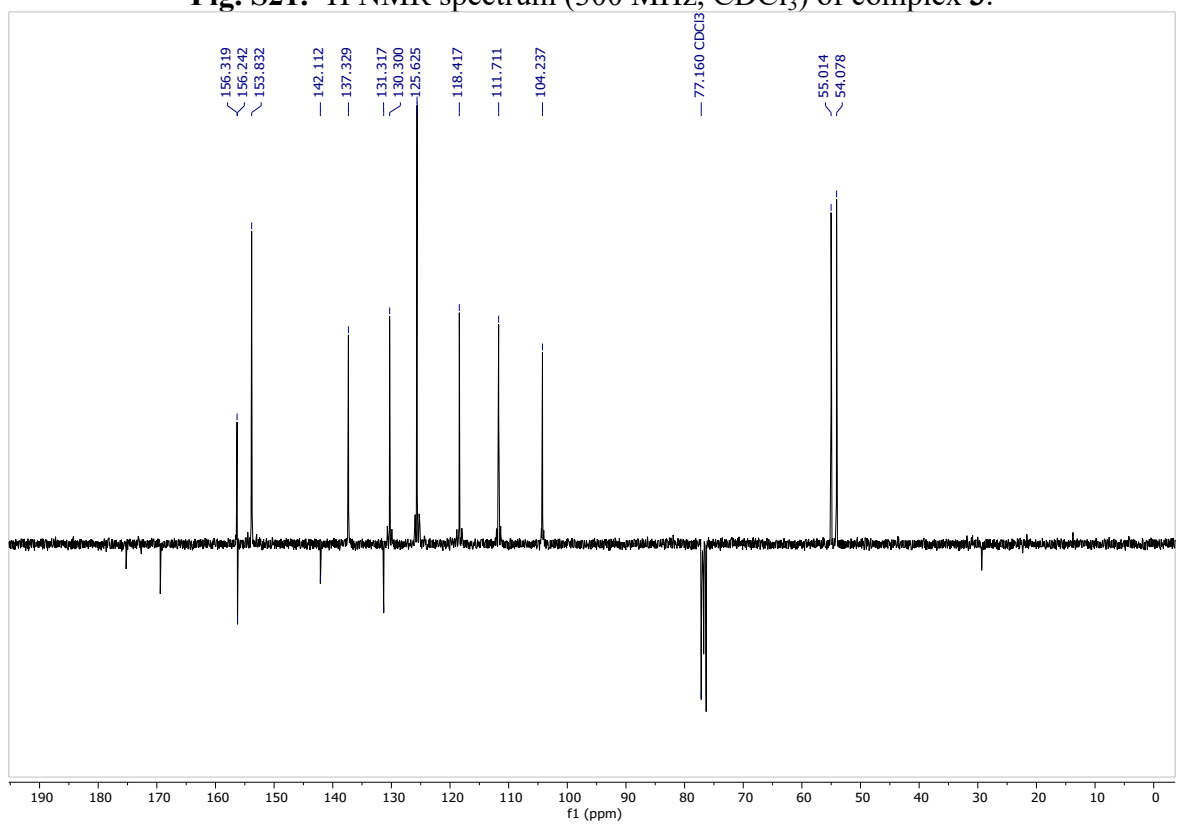

Fig. S22. <sup>13</sup>C NMR spectrum (75 MHz, CDCl<sub>3</sub>) of complex 3.

## Complex 4

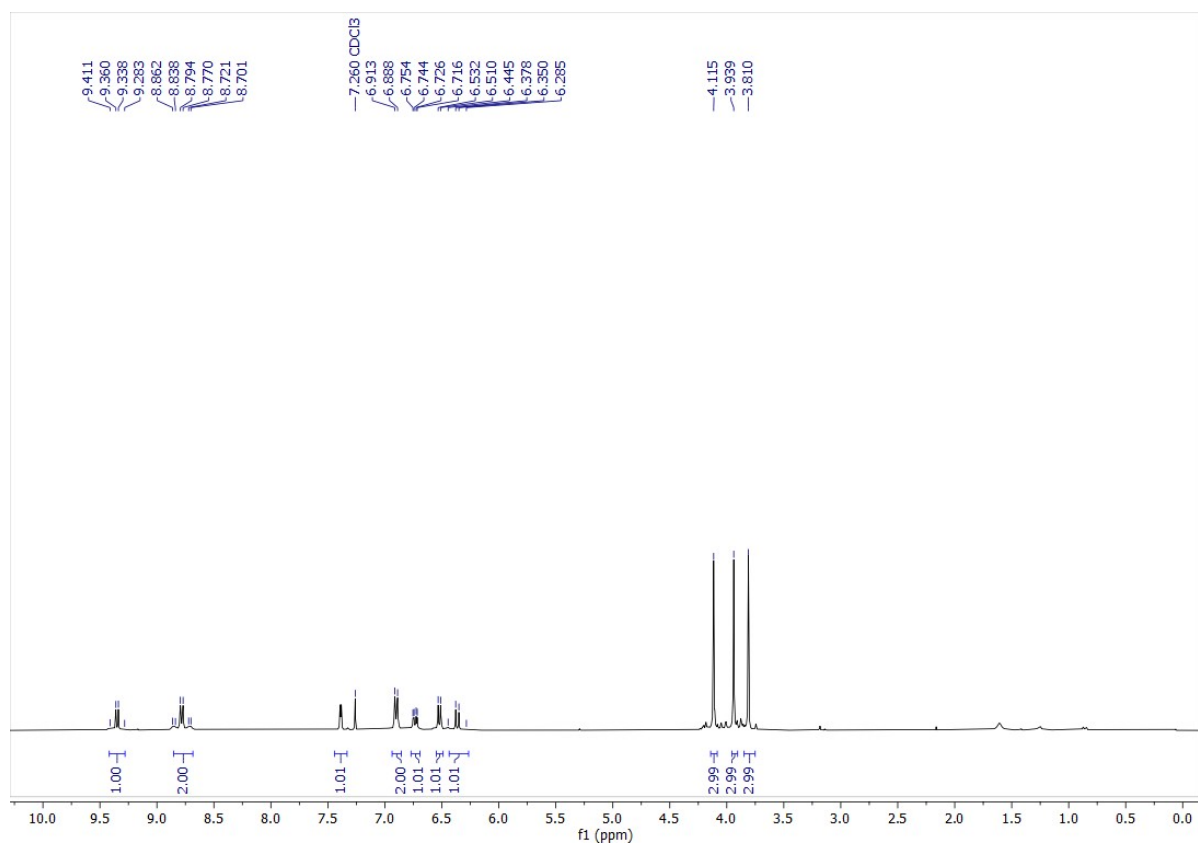

Fig. S23. <sup>1</sup>H NMR spectrum (300 MHz, CDCl<sub>3</sub>) of complex 4.

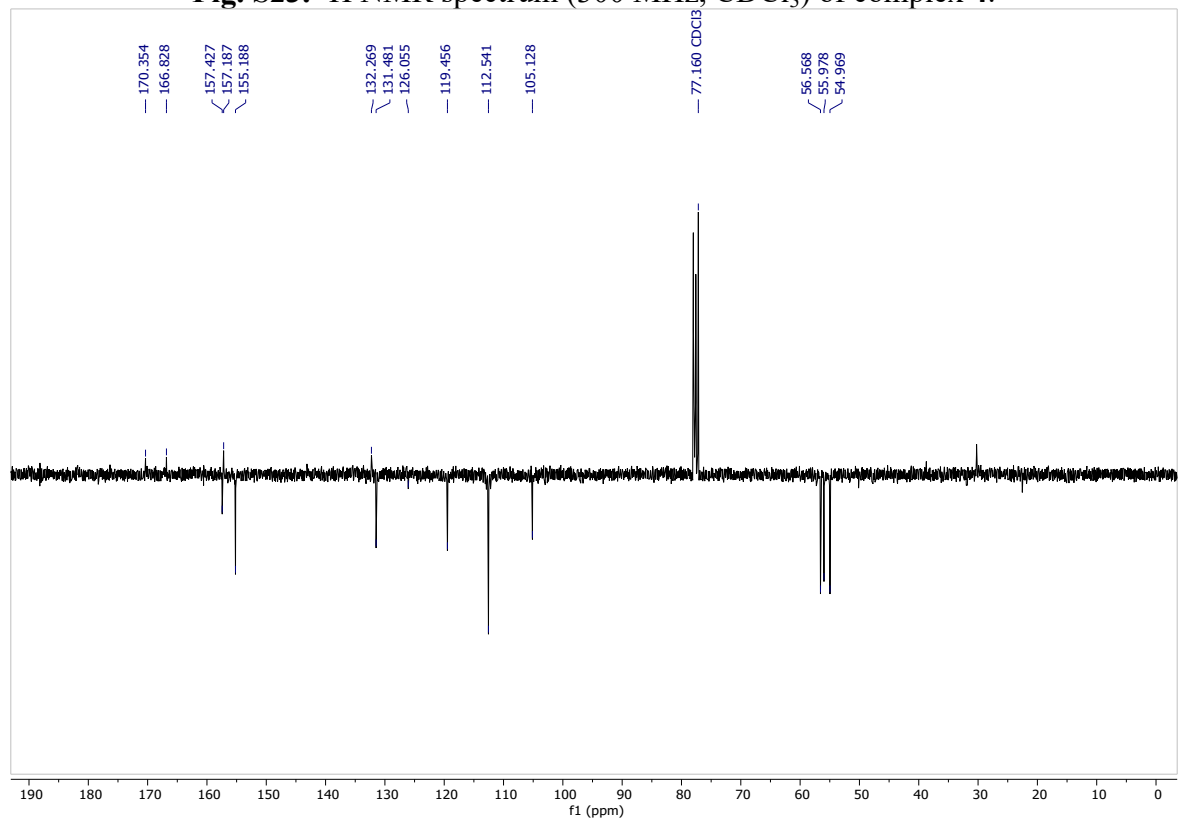

Fig. S24. <sup>13</sup>C NMR spectrum (75 MHz, CDCl<sub>3</sub>) of complex 4.

## Complex 5

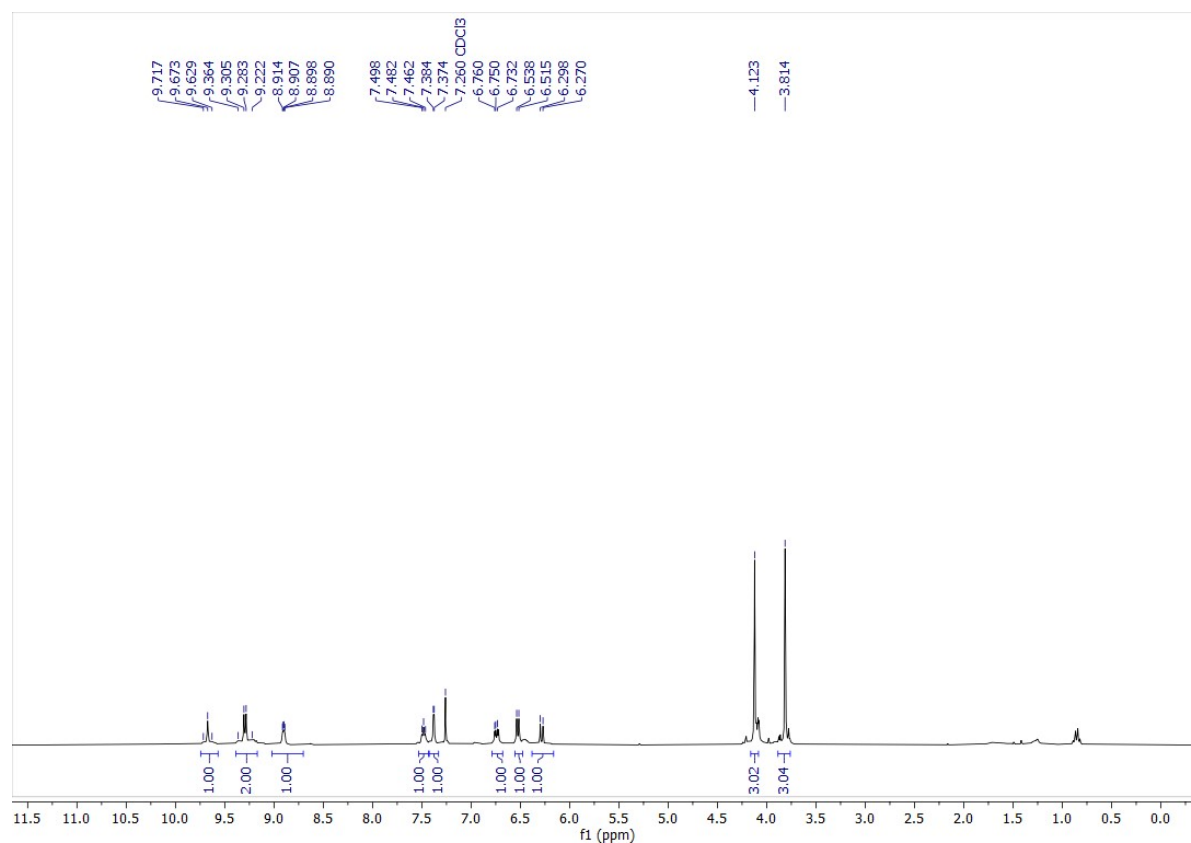

Fig. S25. <sup>1</sup>H NMR spectrum (300 MHz, CDCl<sub>3</sub>) of complex 5.

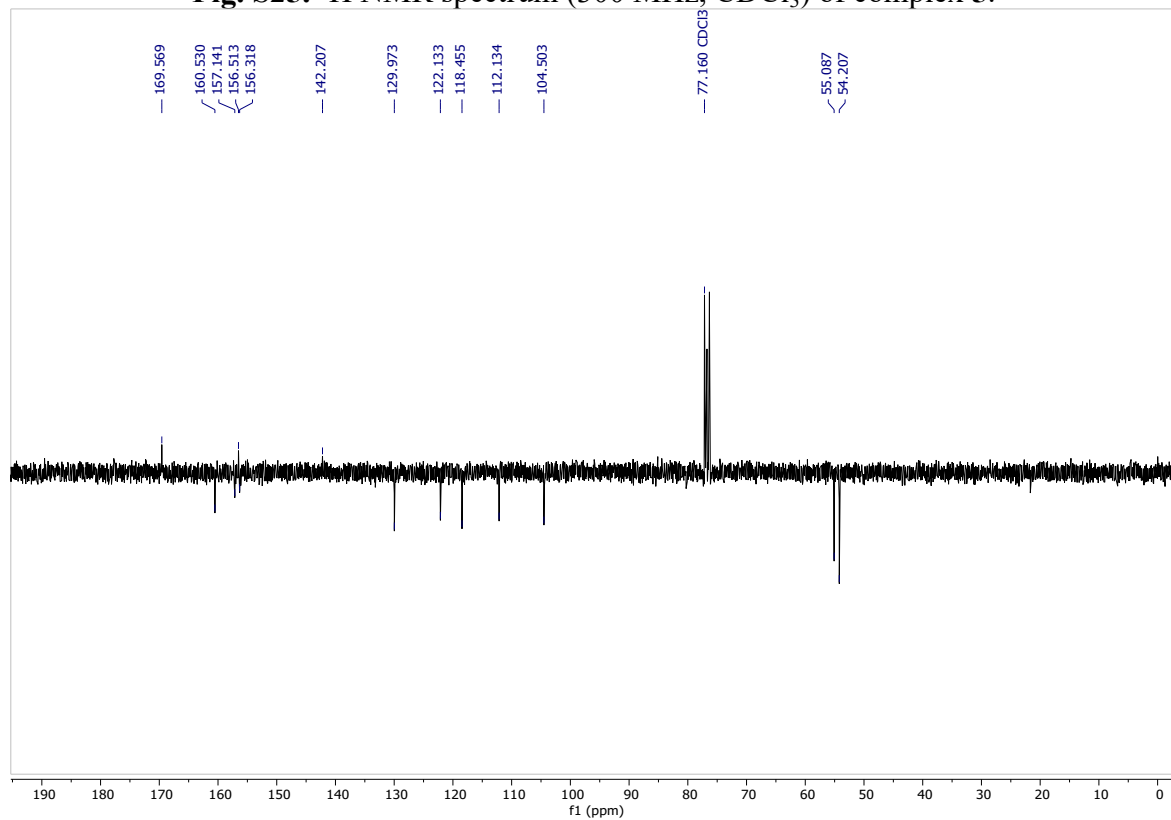

Fig. S26. <sup>13</sup>C NMR spectrum (75 MHz, CDCl<sub>3</sub>) of complex 5.

## Complex 7

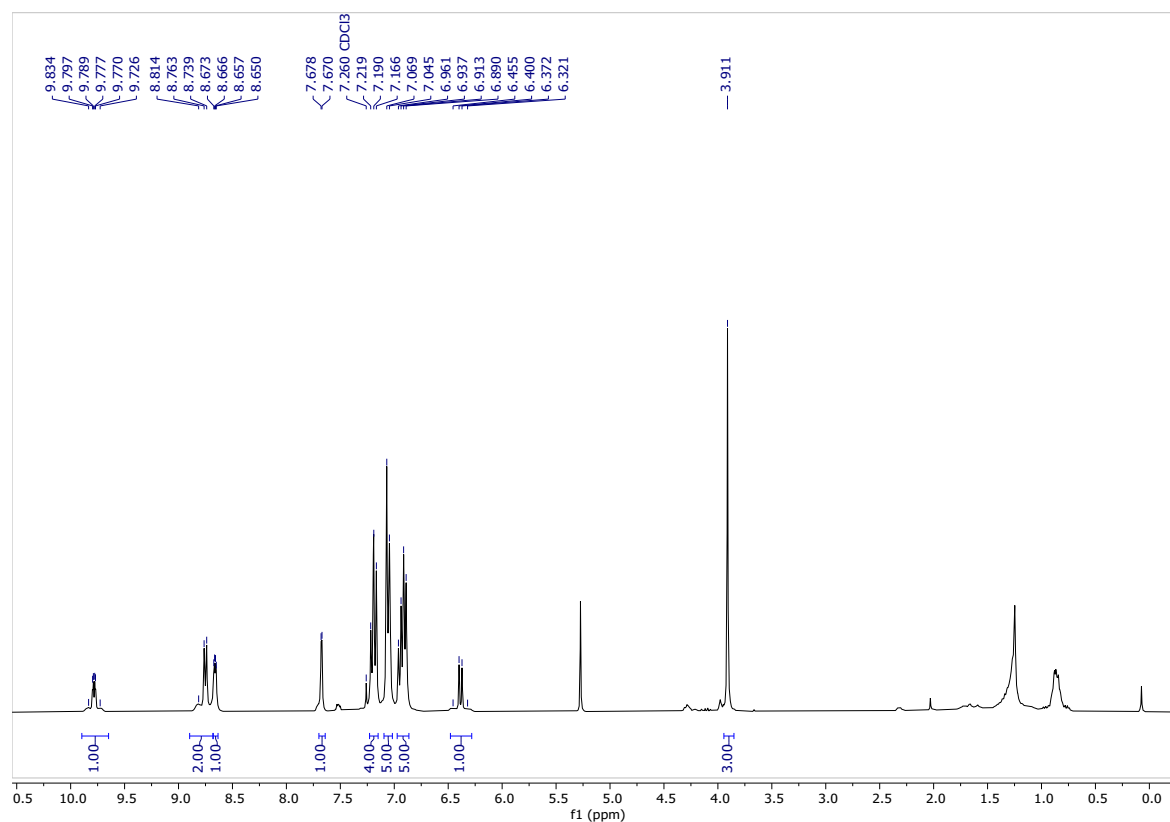

Fig. S27. <sup>1</sup>H NMR spectrum (300 MHz, CDCl<sub>3</sub>) of complex 7.

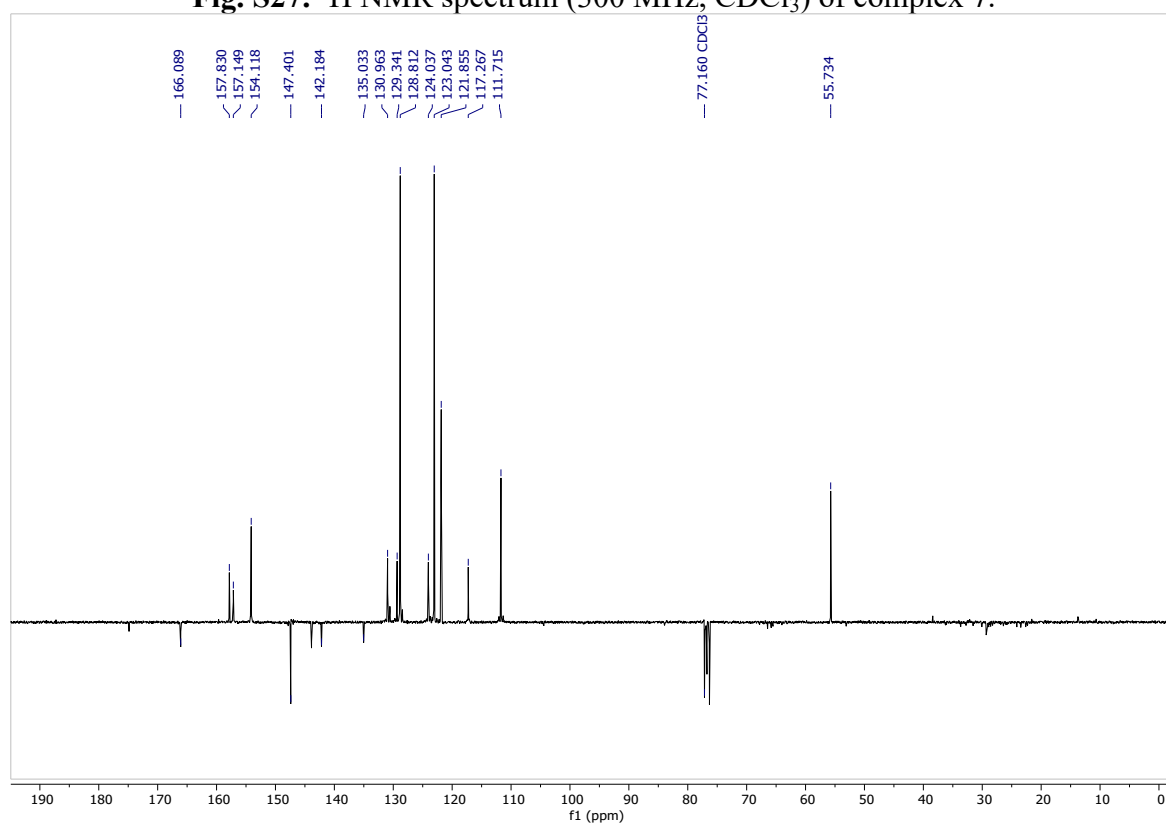

Fig. S28. <sup>13</sup>C NMR spectrum (75 MHz, CDCl<sub>3</sub>) of complex 7.

## Complex 8

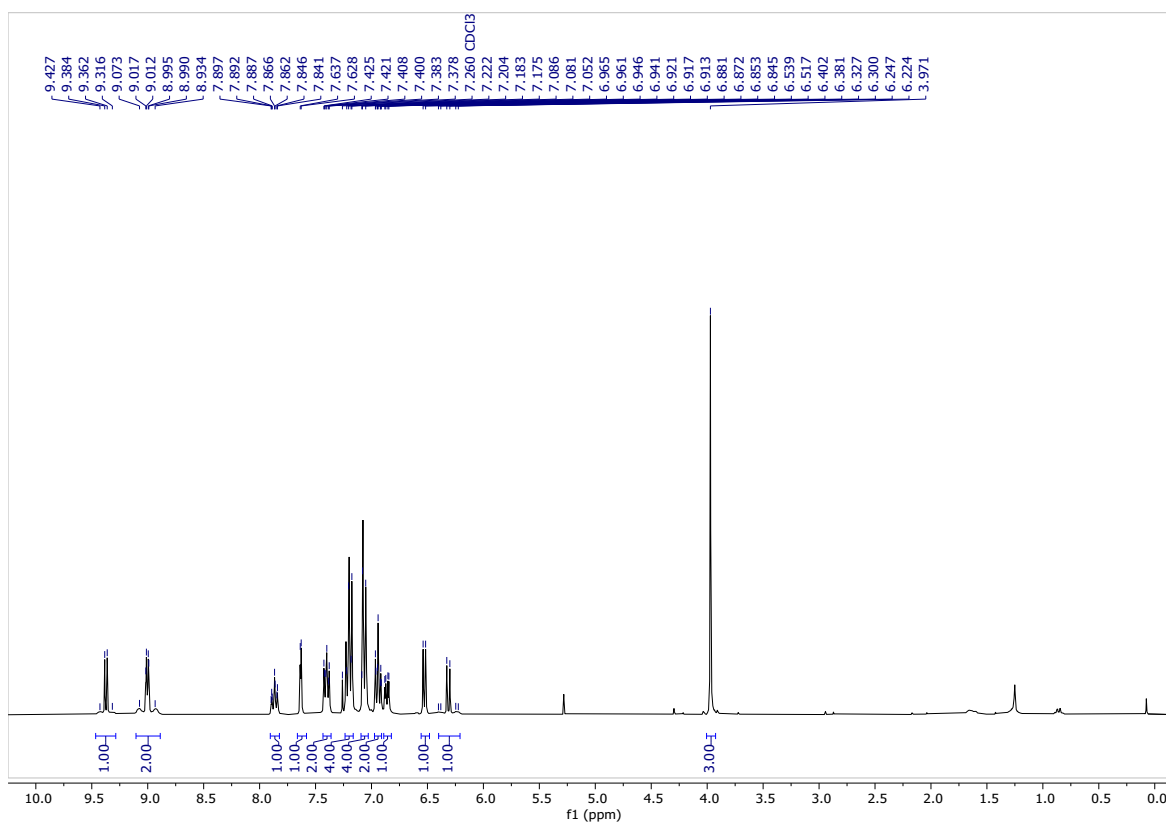

Fig. S29. <sup>1</sup>H NMR spectrum (300 MHz, CDCl<sub>3</sub>) of complex 8.

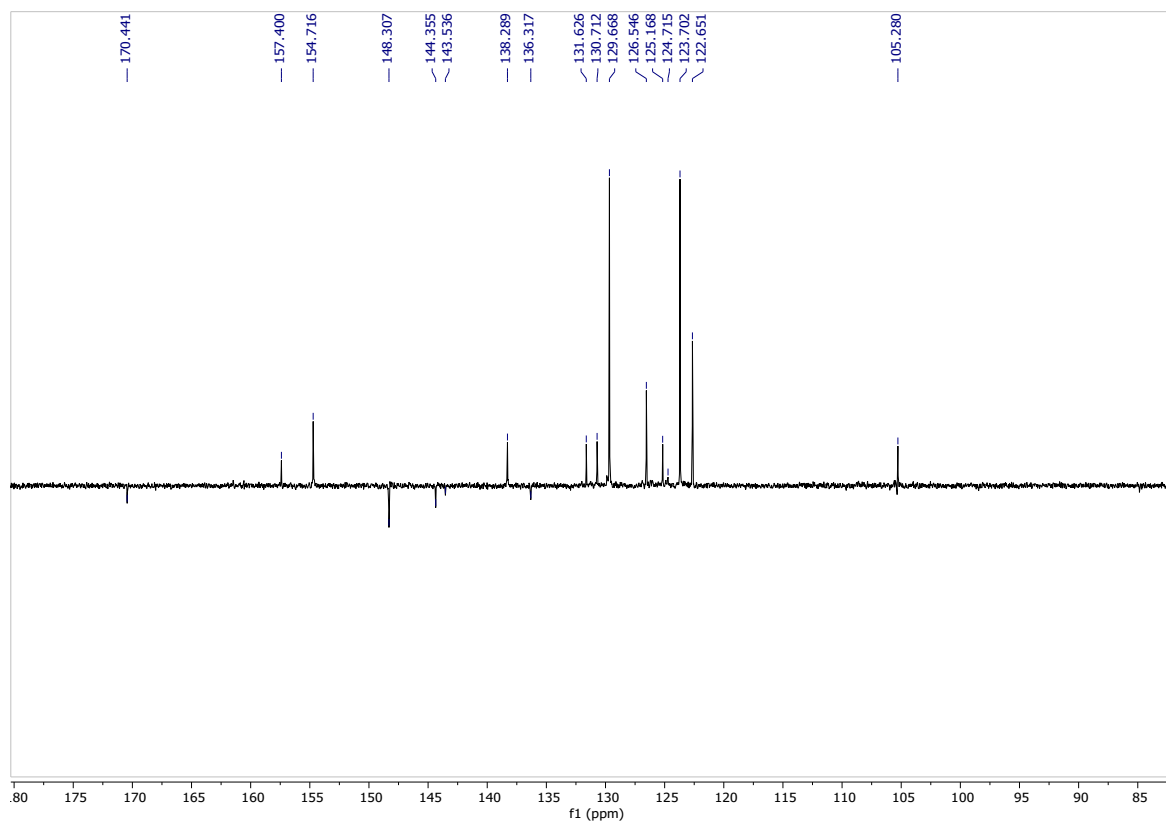

Fig. S30. <sup>13</sup>C NMR spectrum (75 MHz, CDCl<sub>3</sub>) of complex 8.



## Complex 9

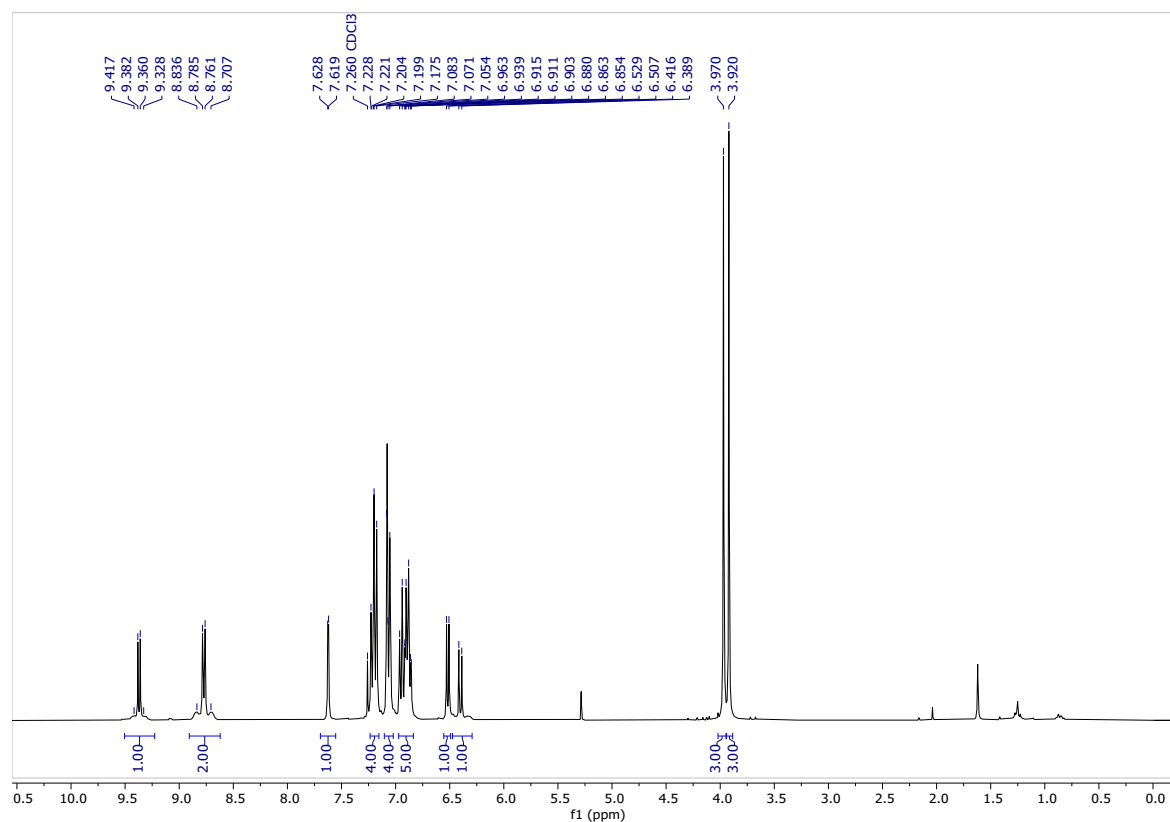

Fig. S21. <sup>1</sup>H NMR spectrum (300 MHz, CDCl<sub>3</sub>) of complex 9.

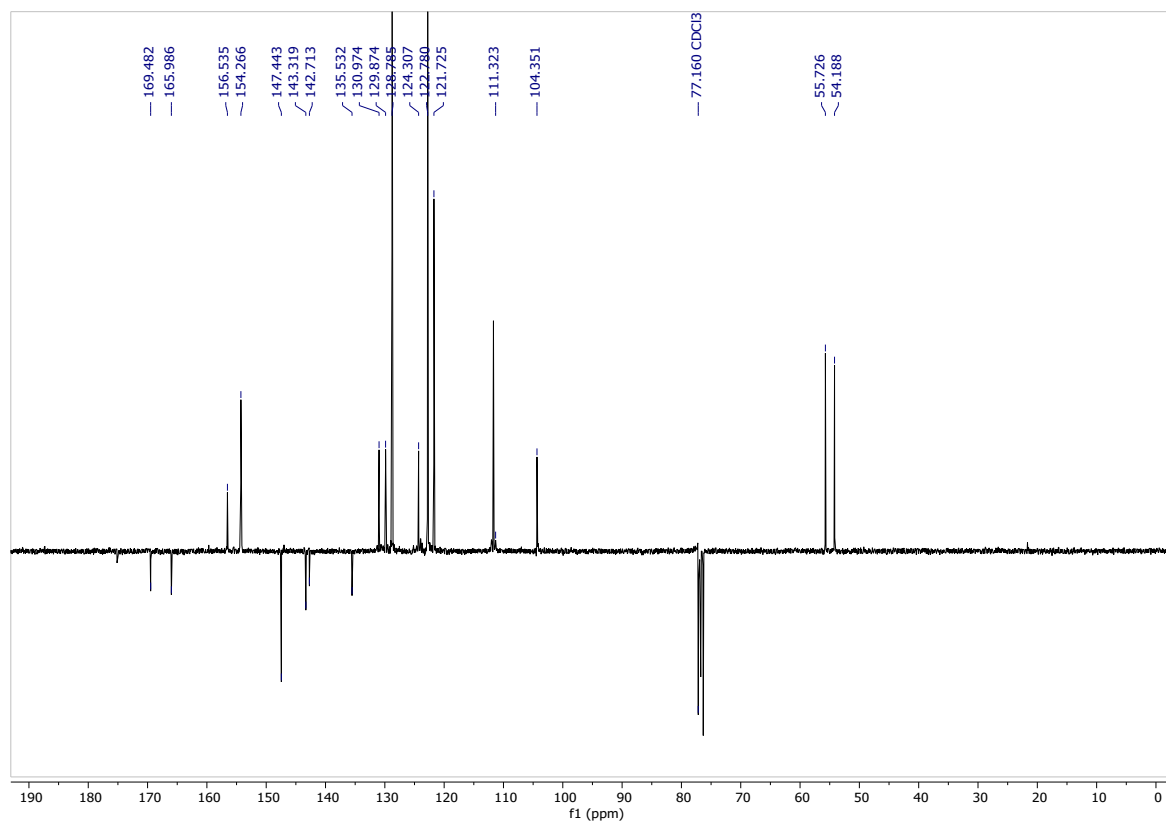

Fig. S32. <sup>13</sup>C NMR spectrum (75 MHz, CDCl<sub>3</sub>) of complex 9.

## Complex 10

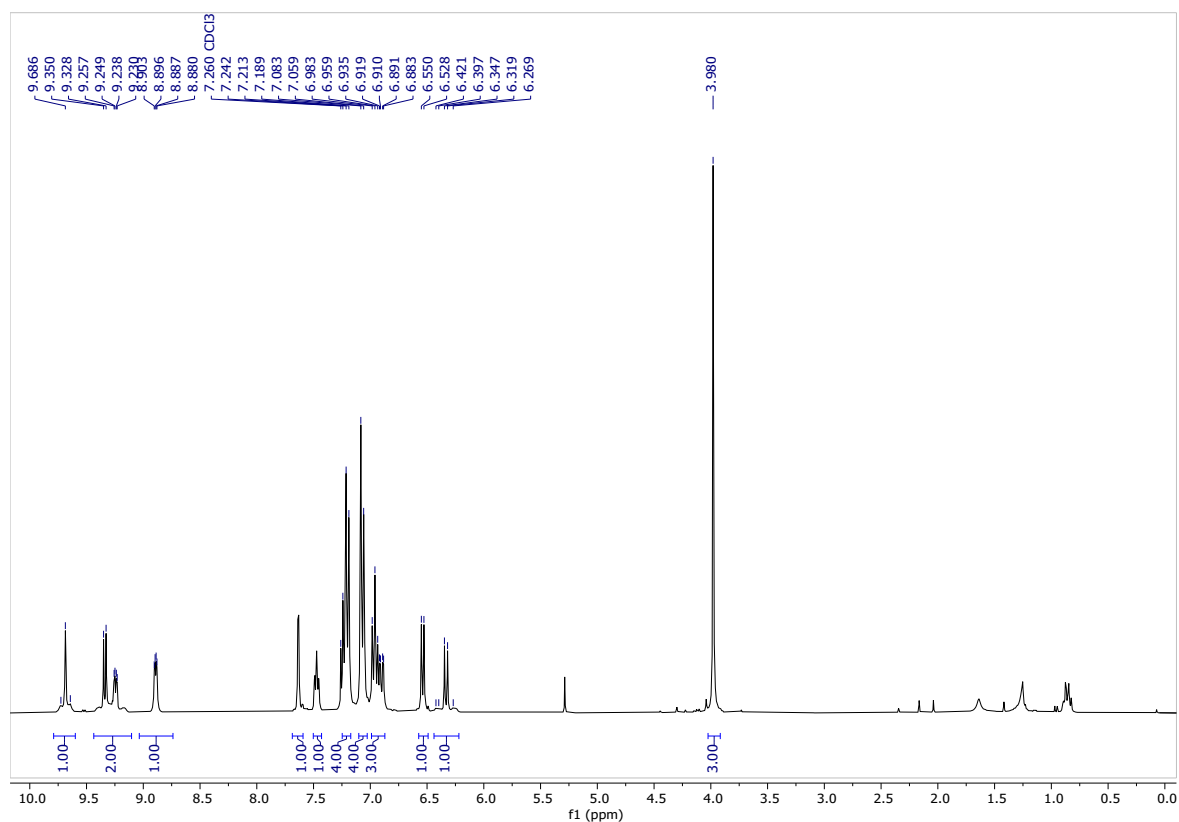

Fig. S33. <sup>1</sup>H NMR spectrum (300 MHz, CDCl<sub>3</sub>) of complex 10.

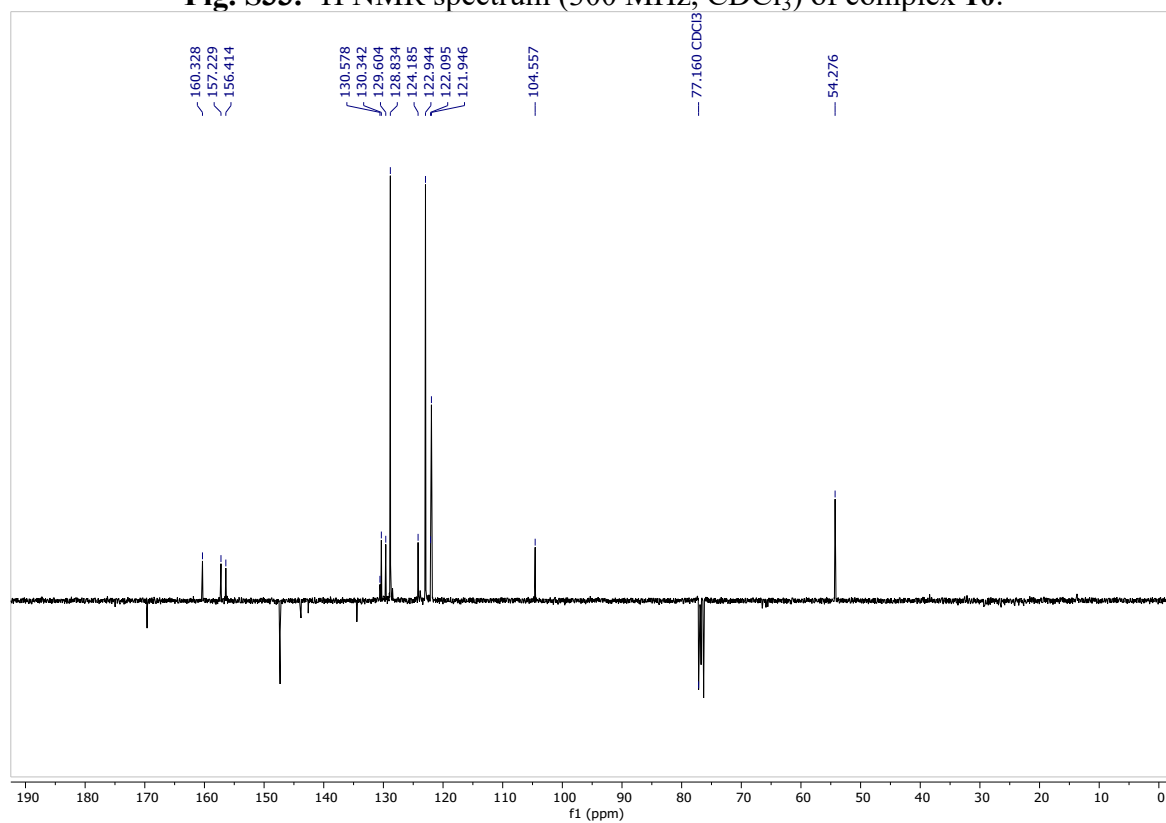

Fig. S34. <sup>13</sup>C NMR spectrum (75 MHz, CDCl<sub>3</sub>) of complex 10.

## Complex 11

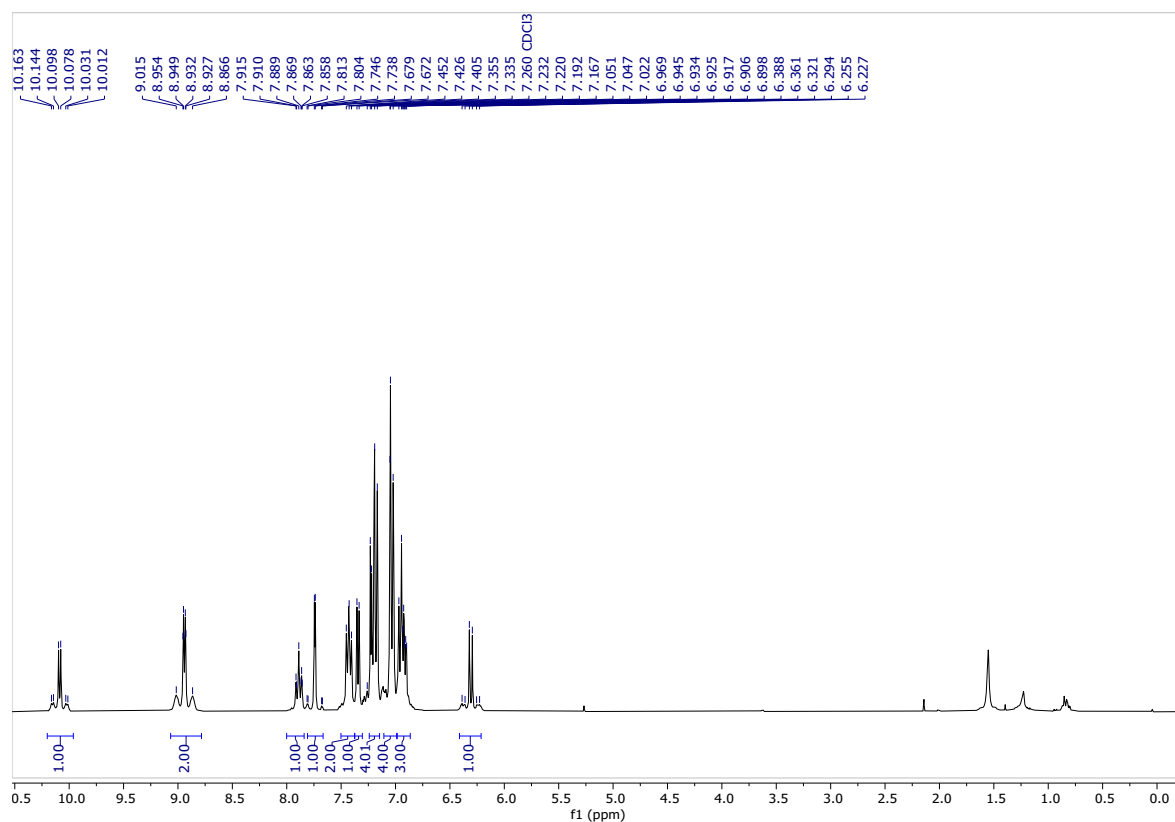

Fig. S35. <sup>1</sup>H NMR spectrum (300 MHz, CDCl<sub>3</sub>) of complex 11.

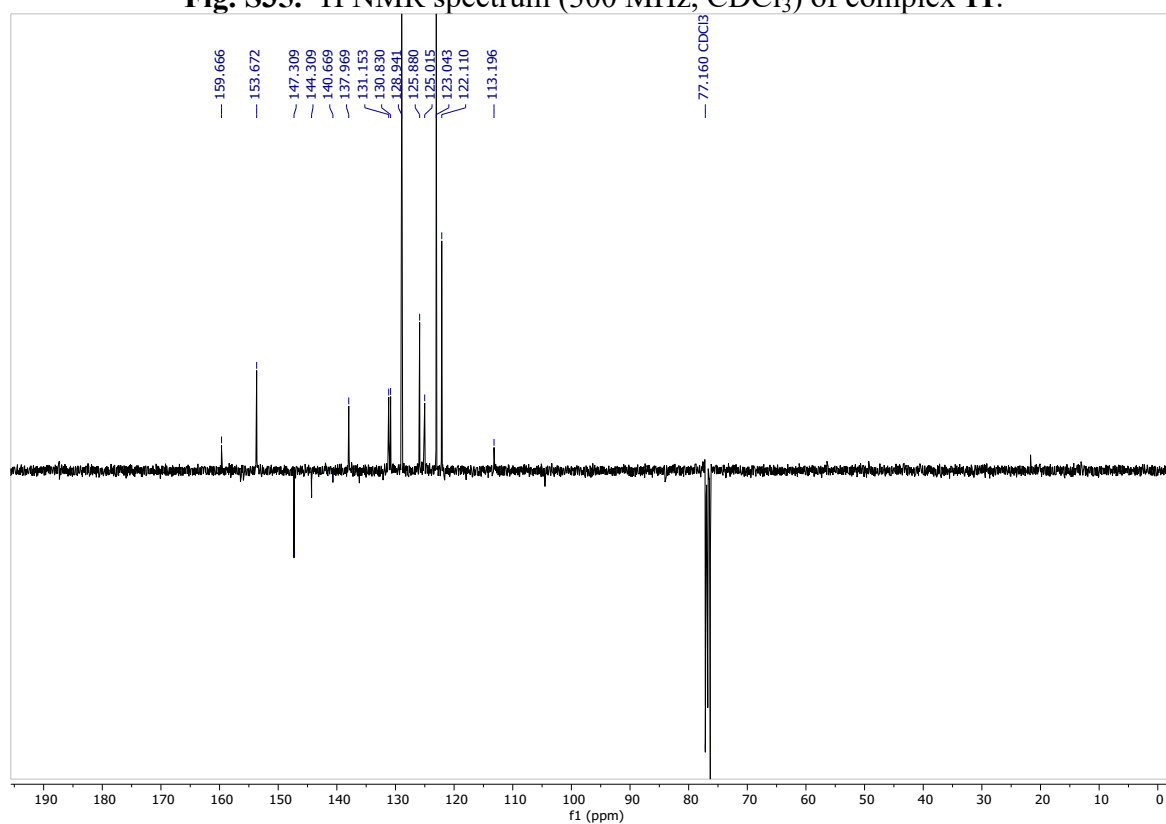

Fig. S36. <sup>13</sup>C NMR spectrum (75 MHz, CDCl<sub>3</sub>) of complex 11.

## Complex 12

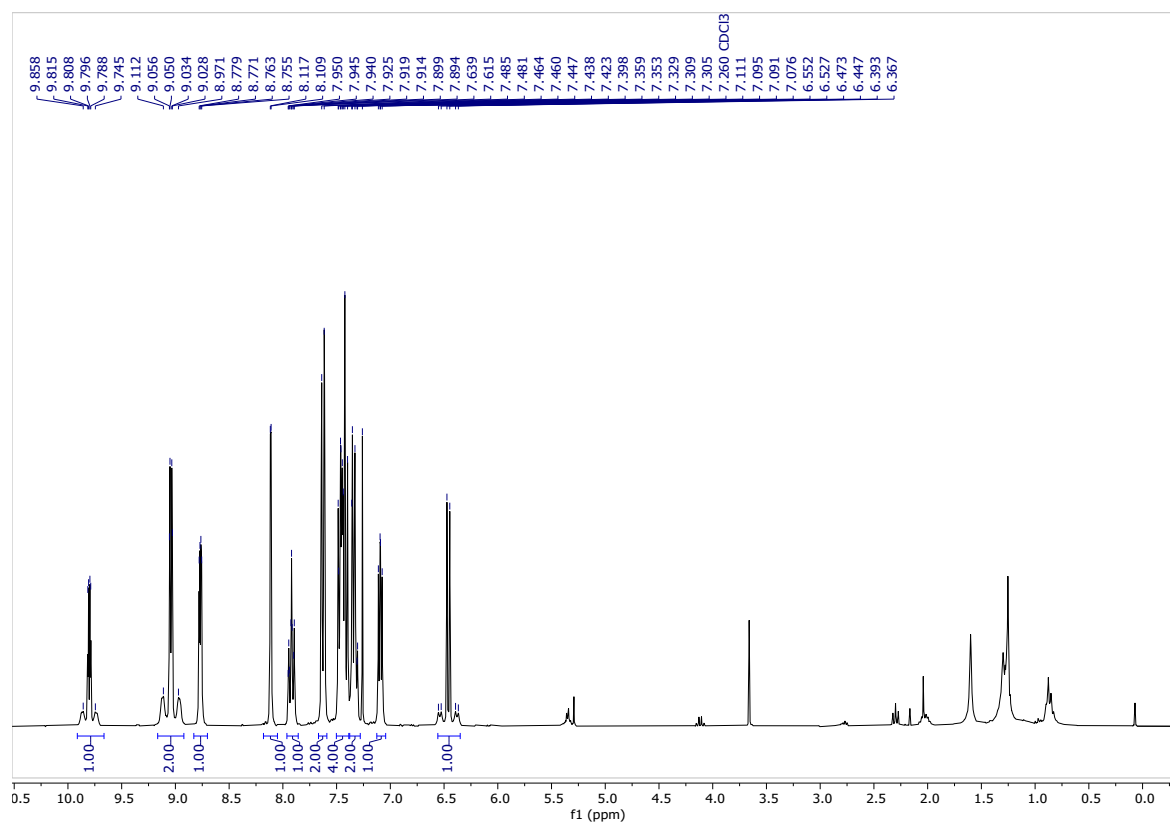

Fig. S37. <sup>1</sup>H NMR spectrum (300 MHz, CDCl<sub>3</sub>) of complex 12.

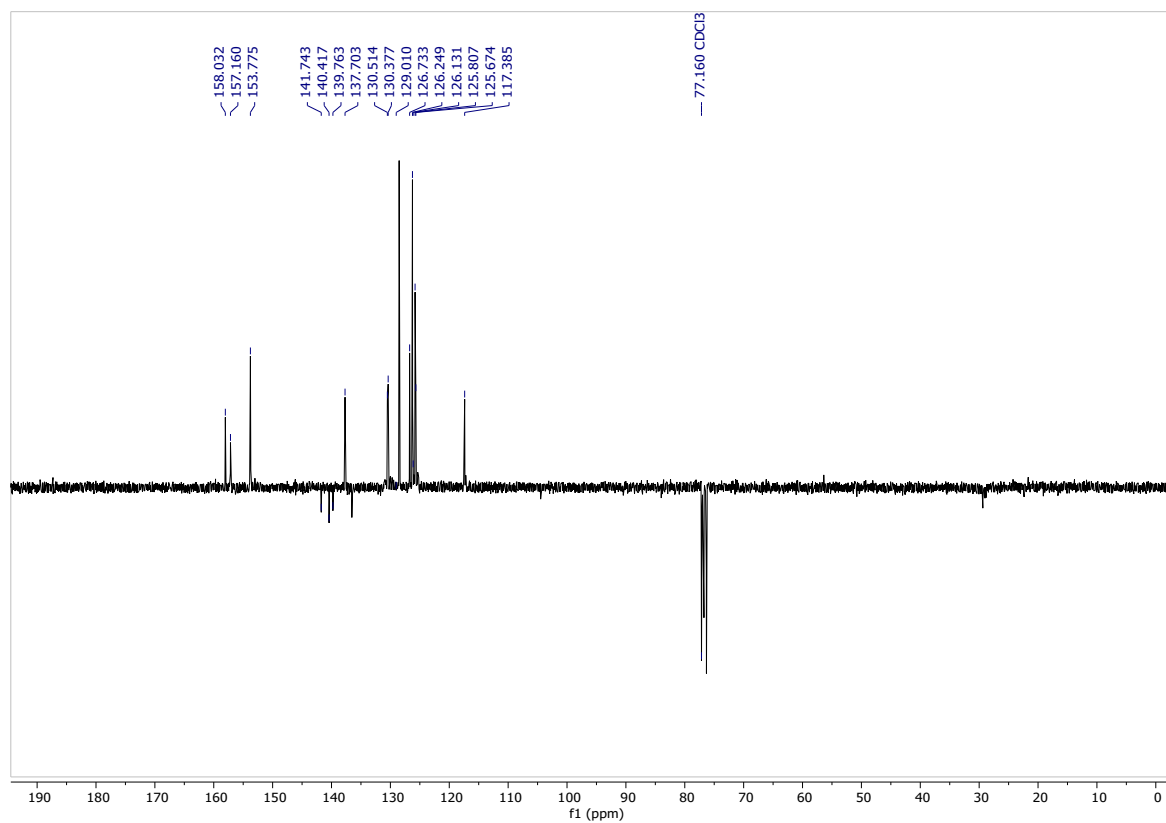

Fig. S38. <sup>13</sup>C NMR spectrum (75 MHz, CDCl<sub>3</sub>) of complex 12.

## Complex 13

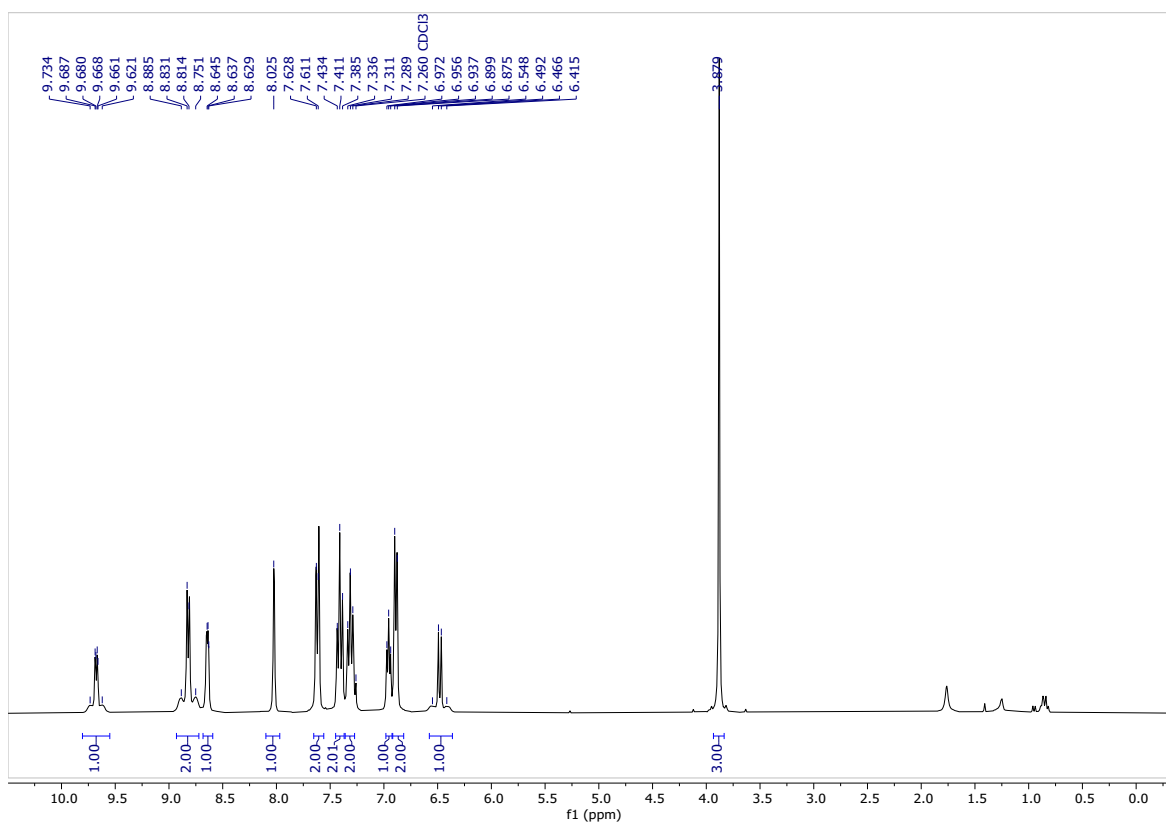

Fig. S39. <sup>1</sup>H NMR spectrum (300 MHz, CDCl<sub>3</sub>) of complex 13.

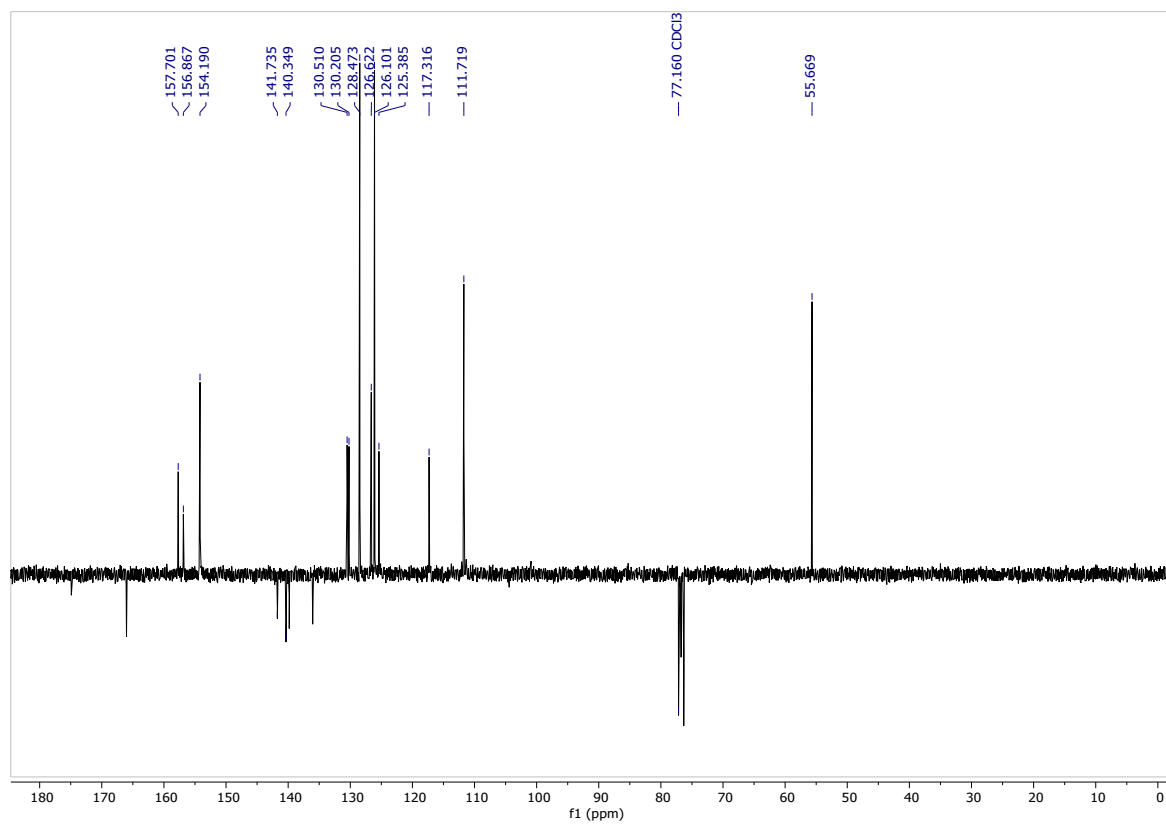

Fig. S40. <sup>13</sup>C NMR spectrum (75 MHz, CDCl<sub>3</sub>) of complex 13.

## Complex 14

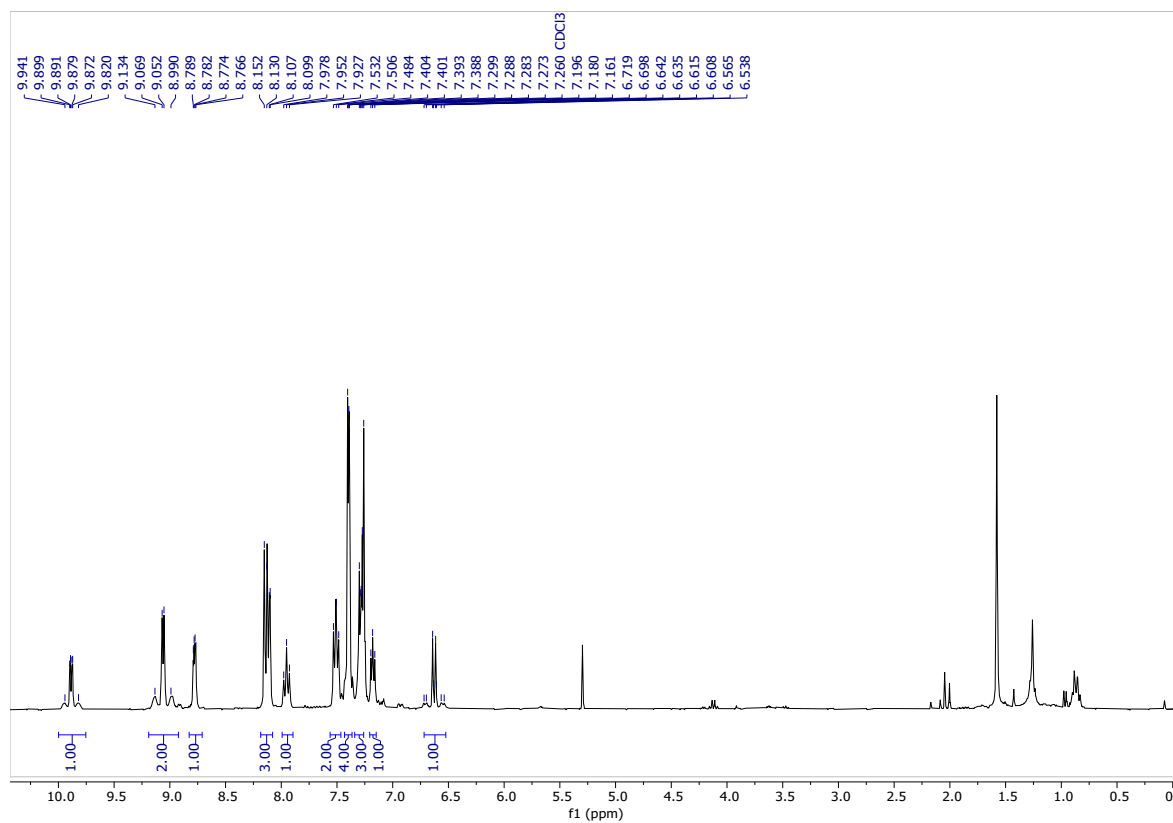

Fig. S41. <sup>1</sup>H NMR spectrum (300 MHz, CDCl<sub>3</sub>) of complex 14.

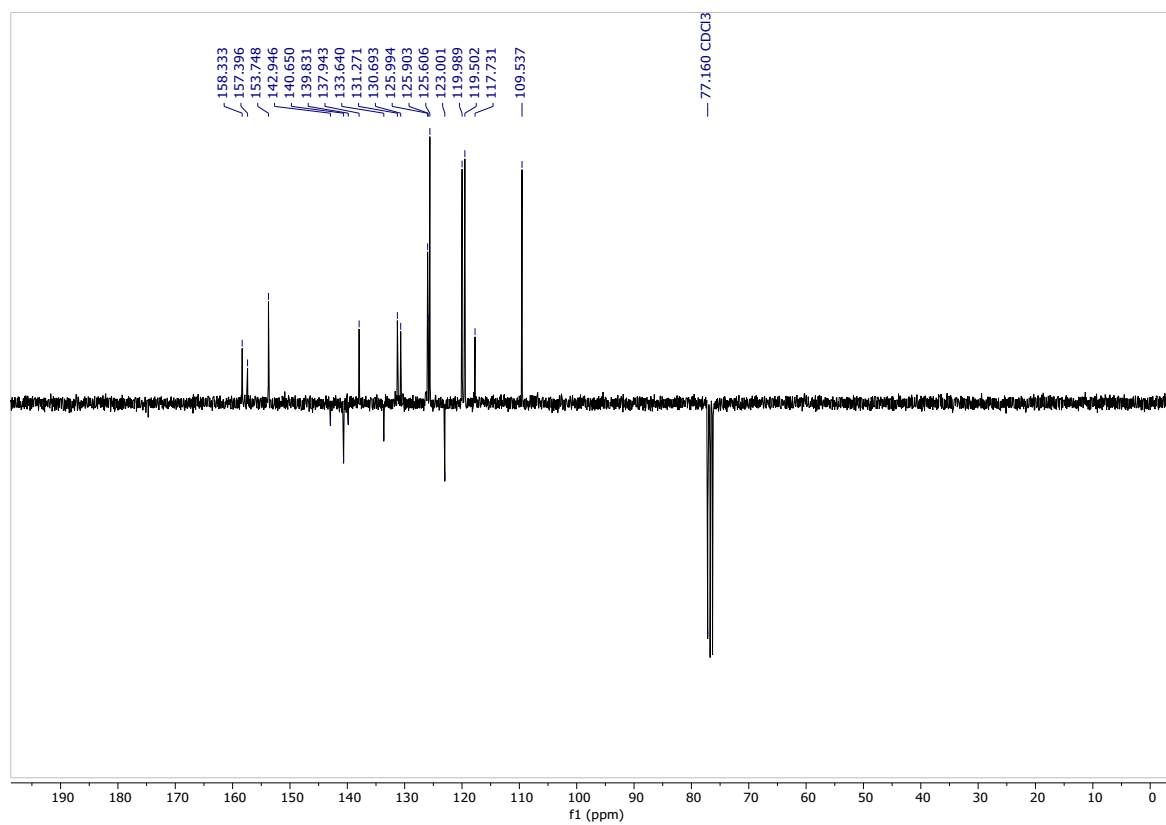

Fig. S42. <sup>13</sup>C NMR spectrum (75 MHz, CDCl<sub>3</sub>) of complex 14.

## Complex 15

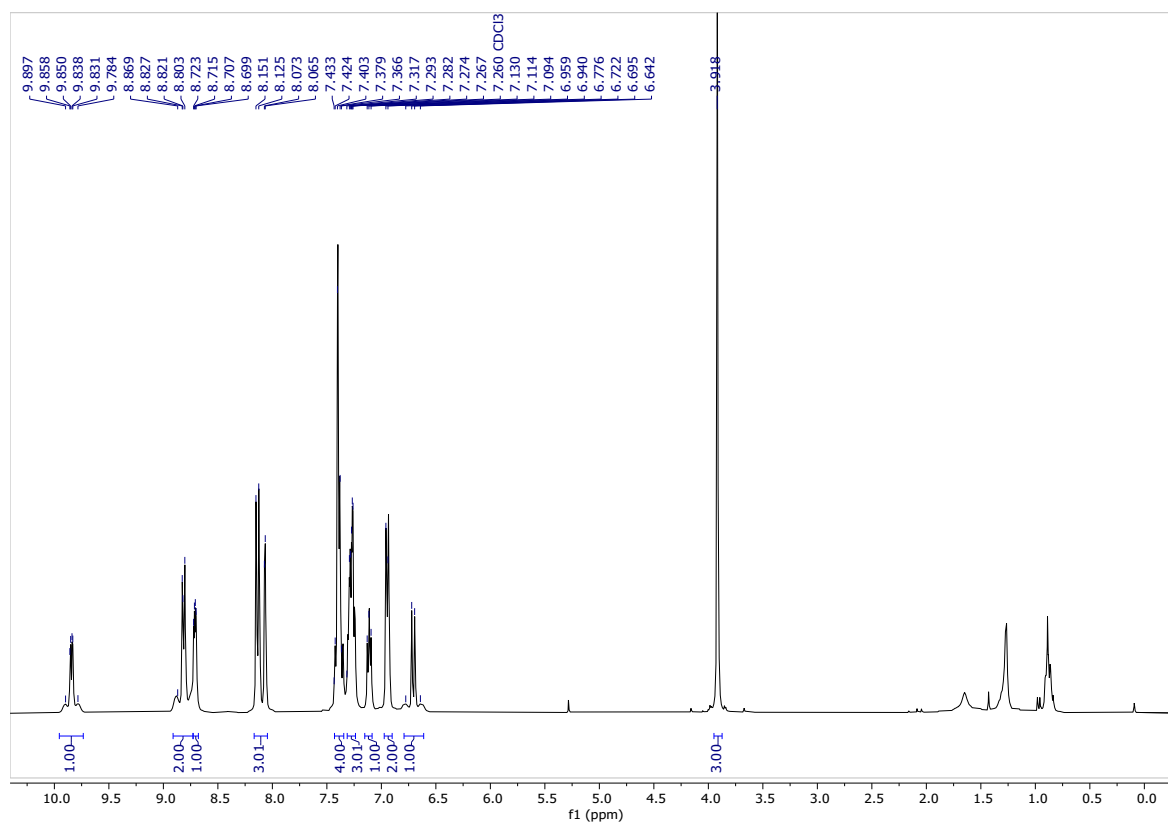

Fig. S43. <sup>1</sup>H NMR spectrum (300 MHz, CDCl<sub>3</sub>) of complex 15.

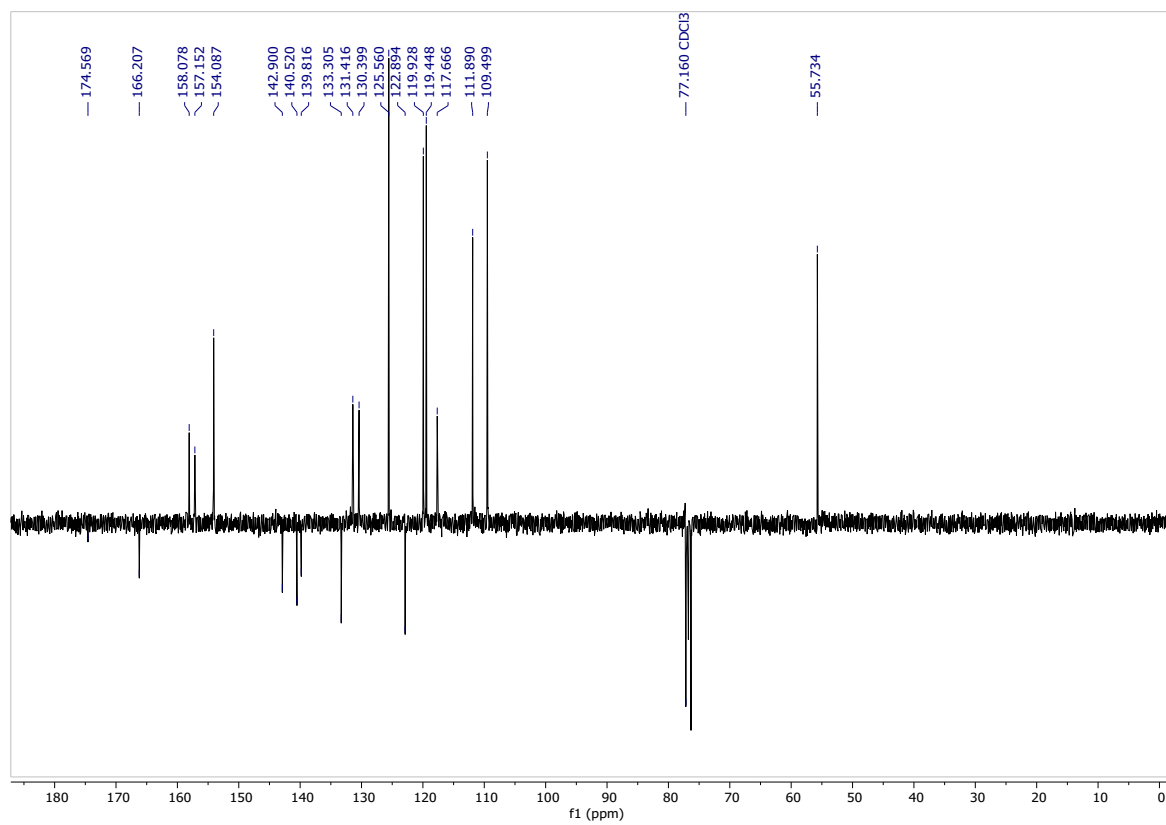

Fig. S44. <sup>13</sup>C NMR spectrum (75 MHz, CDCl<sub>3</sub>) of complex 15.

## Complex 16

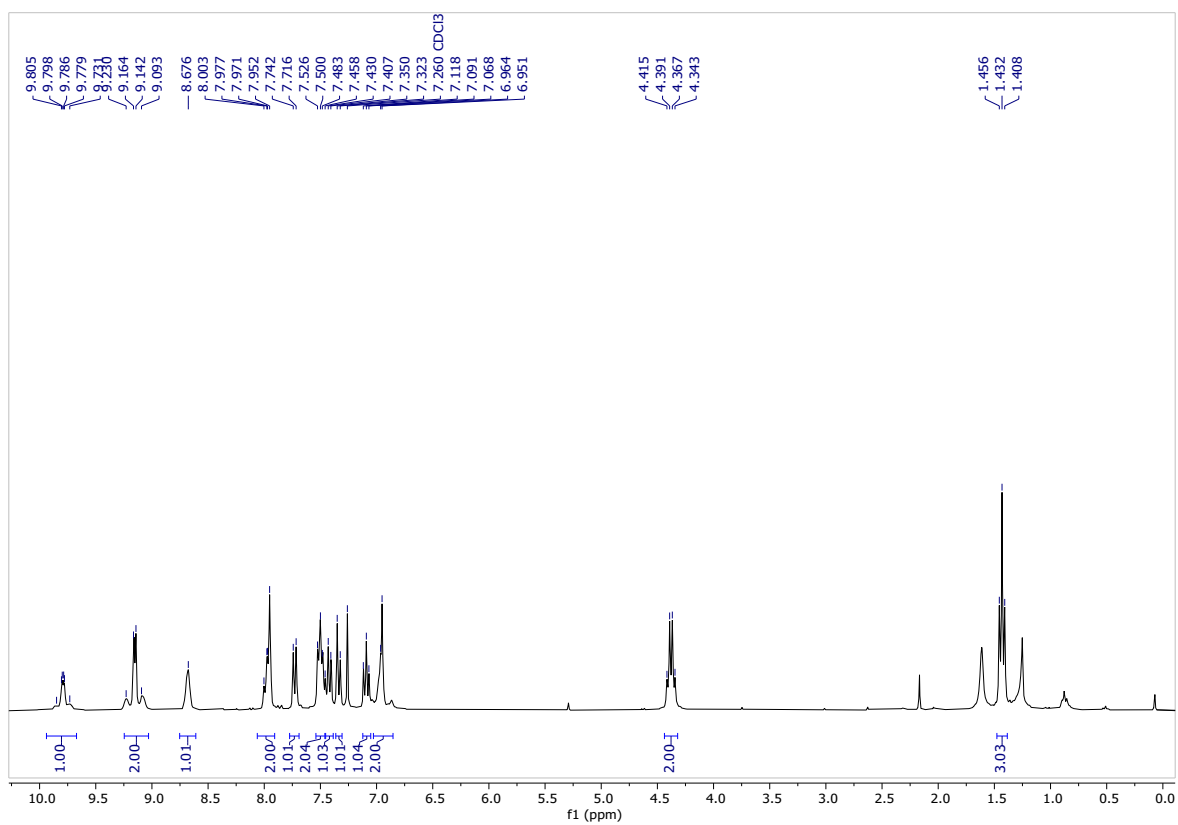

Fig. S45. <sup>1</sup>H NMR spectrum (300 MHz, CDCl<sub>3</sub>) of complex 16.

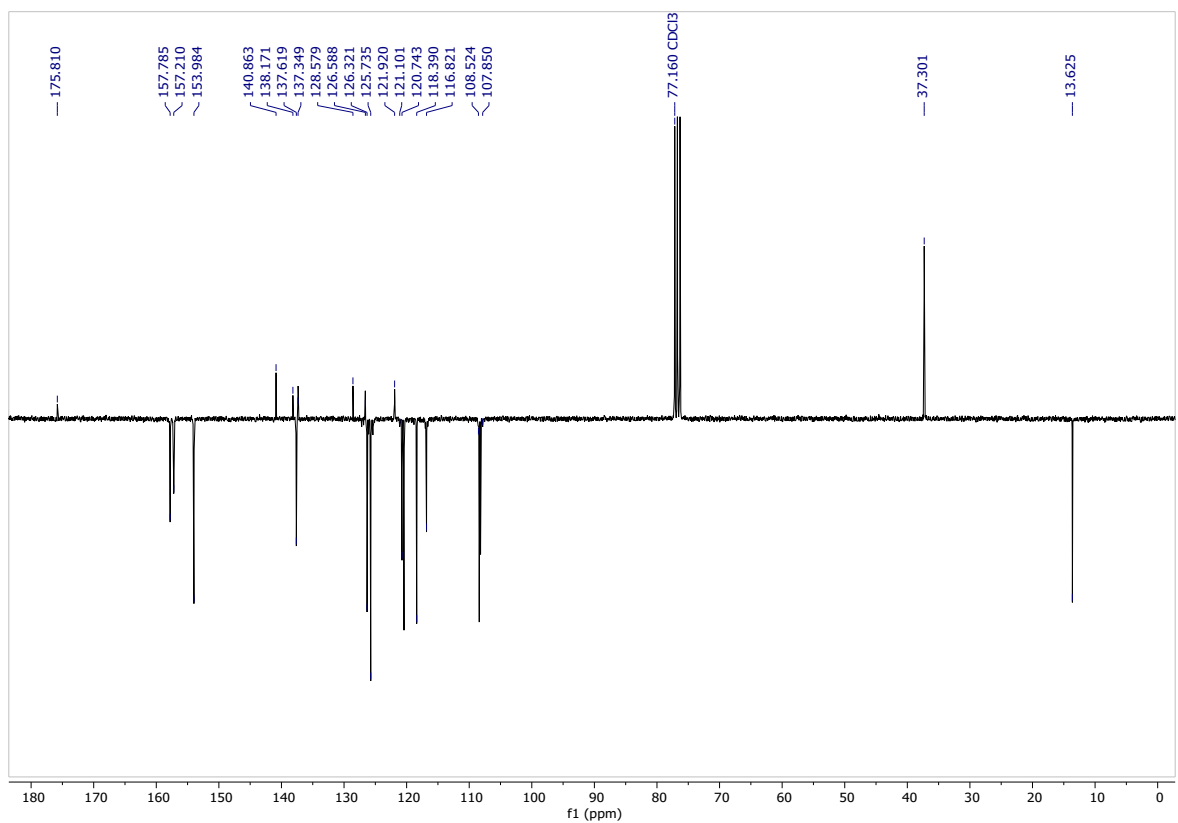

Fig. S46. <sup>13</sup>C NMR spectrum (75 MHz, CDCl<sub>3</sub>) of complex 16.



## Complex 17

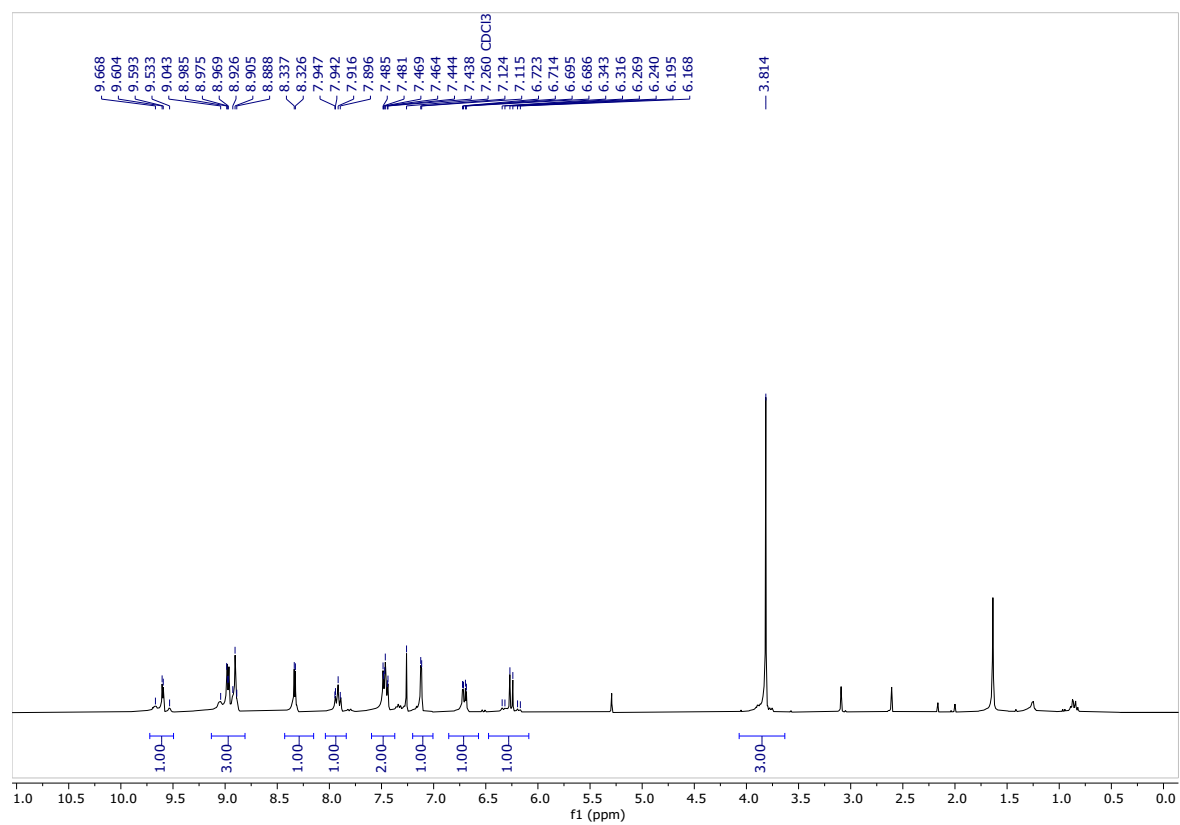

Fig. S47. <sup>1</sup>H NMR spectrum (300 MHz, CDCl<sub>3</sub>) of complex 17.

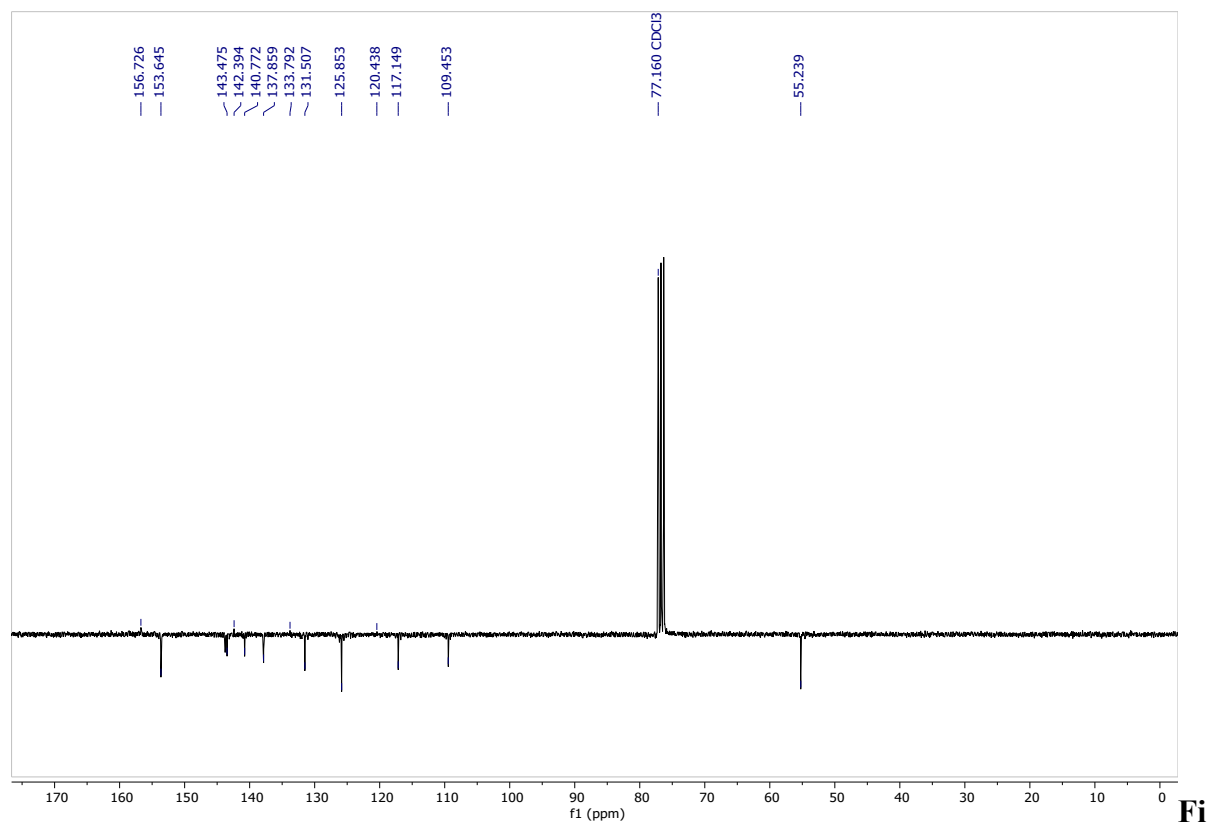

g. S48. <sup>13</sup>C NMR spectrum (75 MHz, CDCl<sub>3</sub>) of complex 17.

Fi

## Complex 18

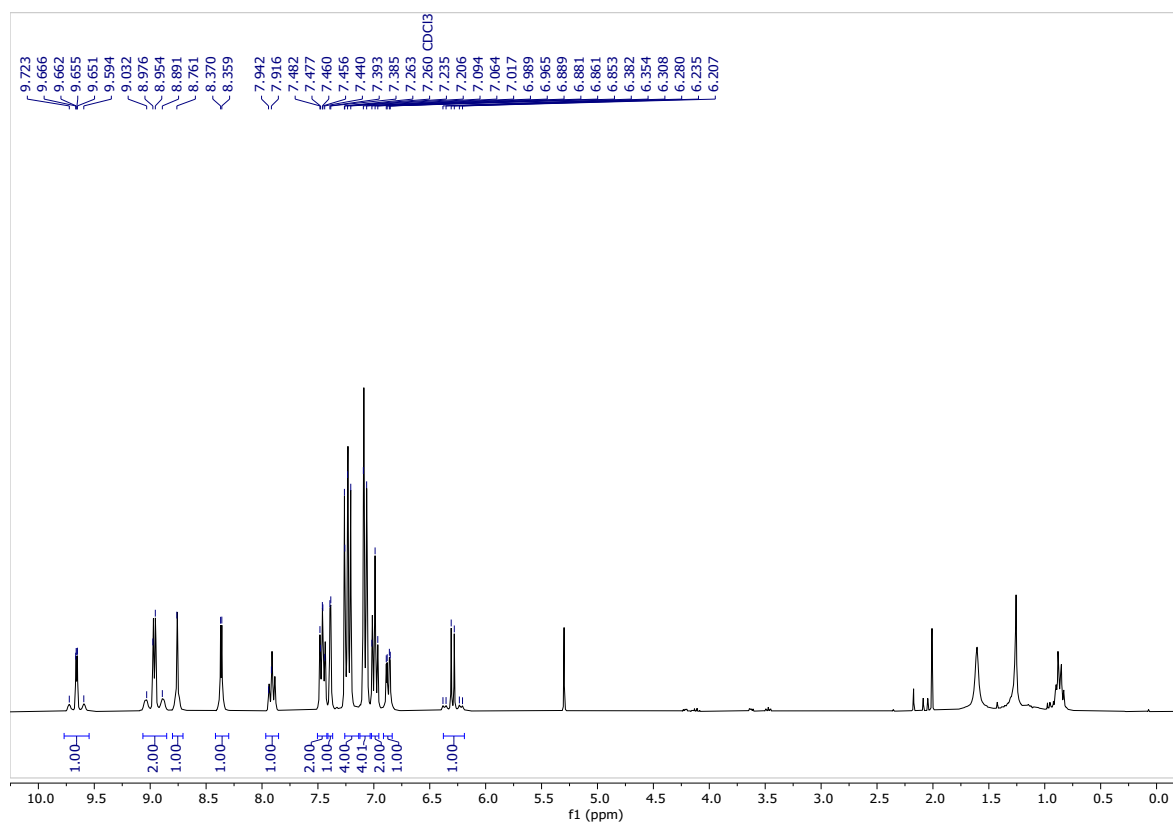

Fig. S49. <sup>1</sup>H NMR spectrum (300 MHz, CDCl<sub>3</sub>) of complex 18.

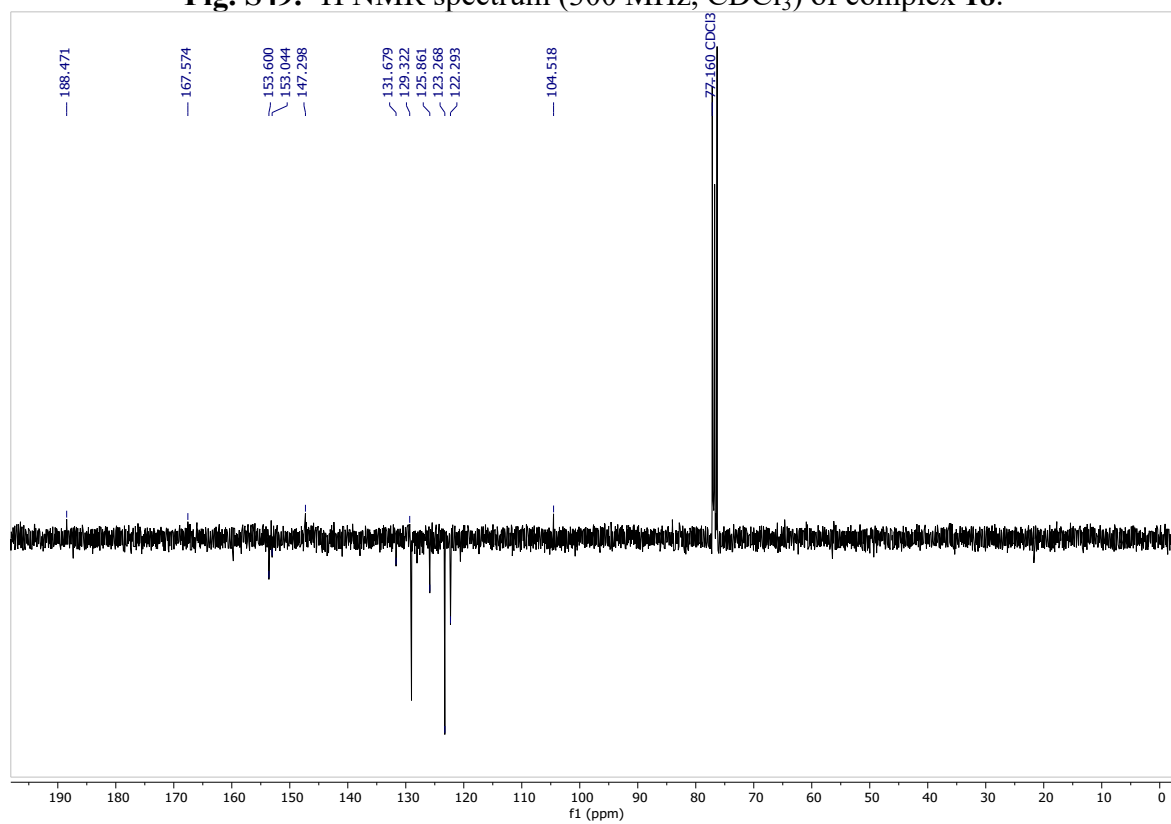

Fig. S50. <sup>13</sup>C NMR spectrum (75 MHz, CDCl<sub>3</sub>) of complex 18.

## Complex 19

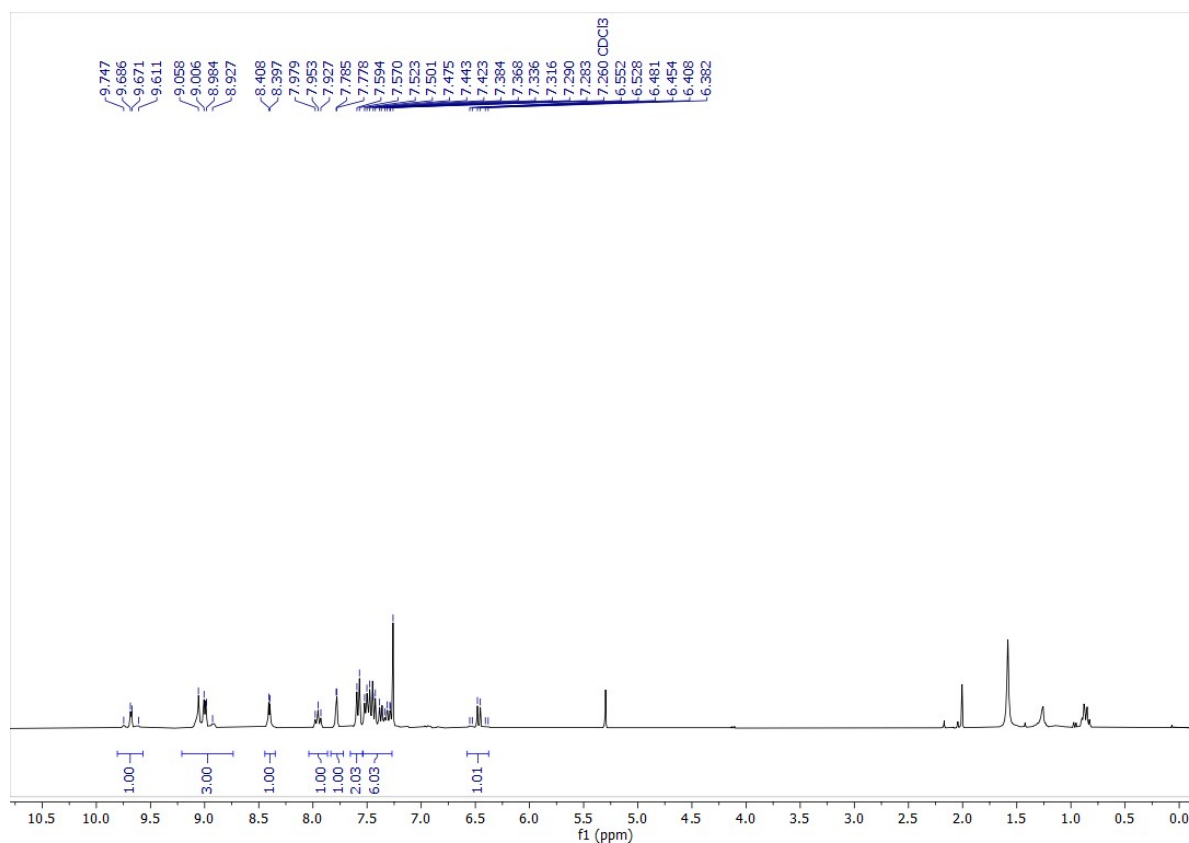

**Fig. S51.** <sup>1</sup>H NMR spectrum (300 MHz, CDCl<sub>3</sub>) of complex 19.

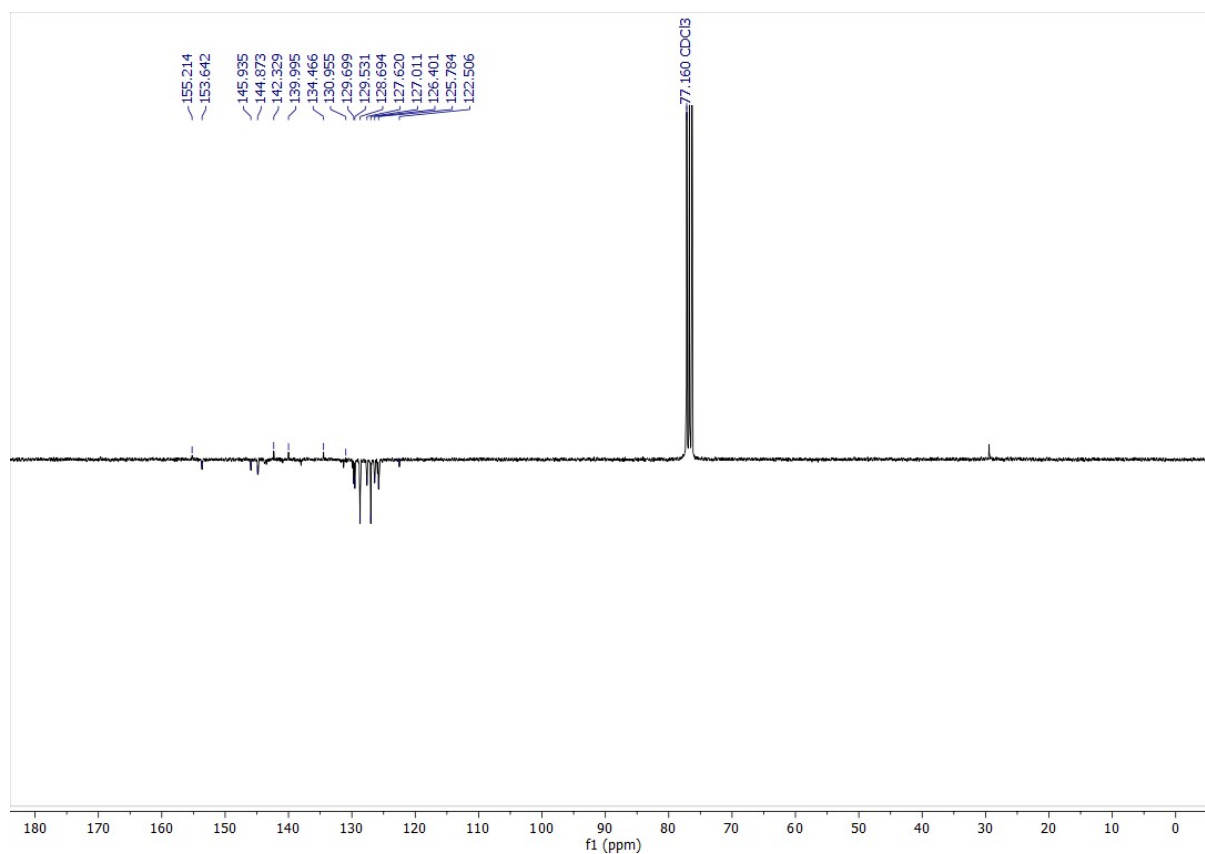

**Fig. S52.** <sup>13</sup>C NMR spectrum (75 MHz, CDCl<sub>3</sub>) of complex 19.

## Complex 20

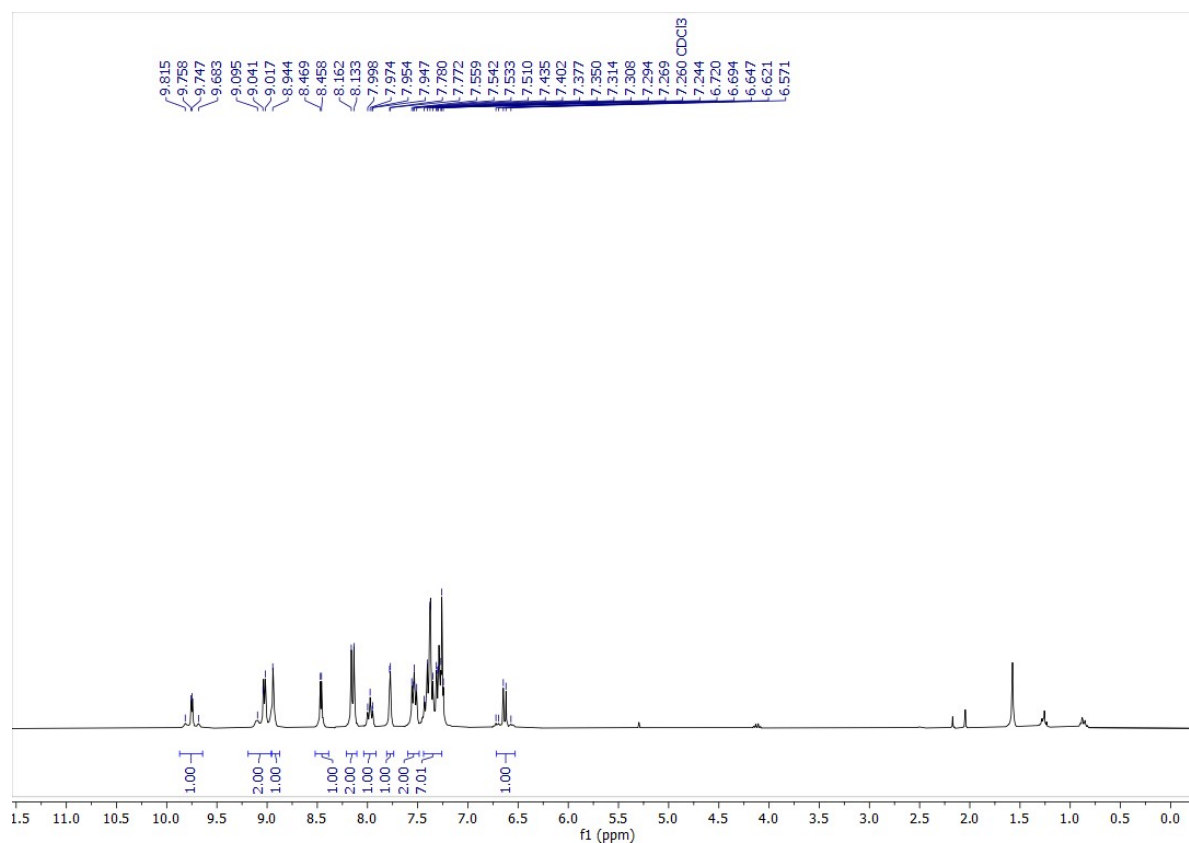

**Fig. S53.** <sup>1</sup>H NMR spectrum (300 MHz, CDCl<sub>3</sub>) of complex 20.

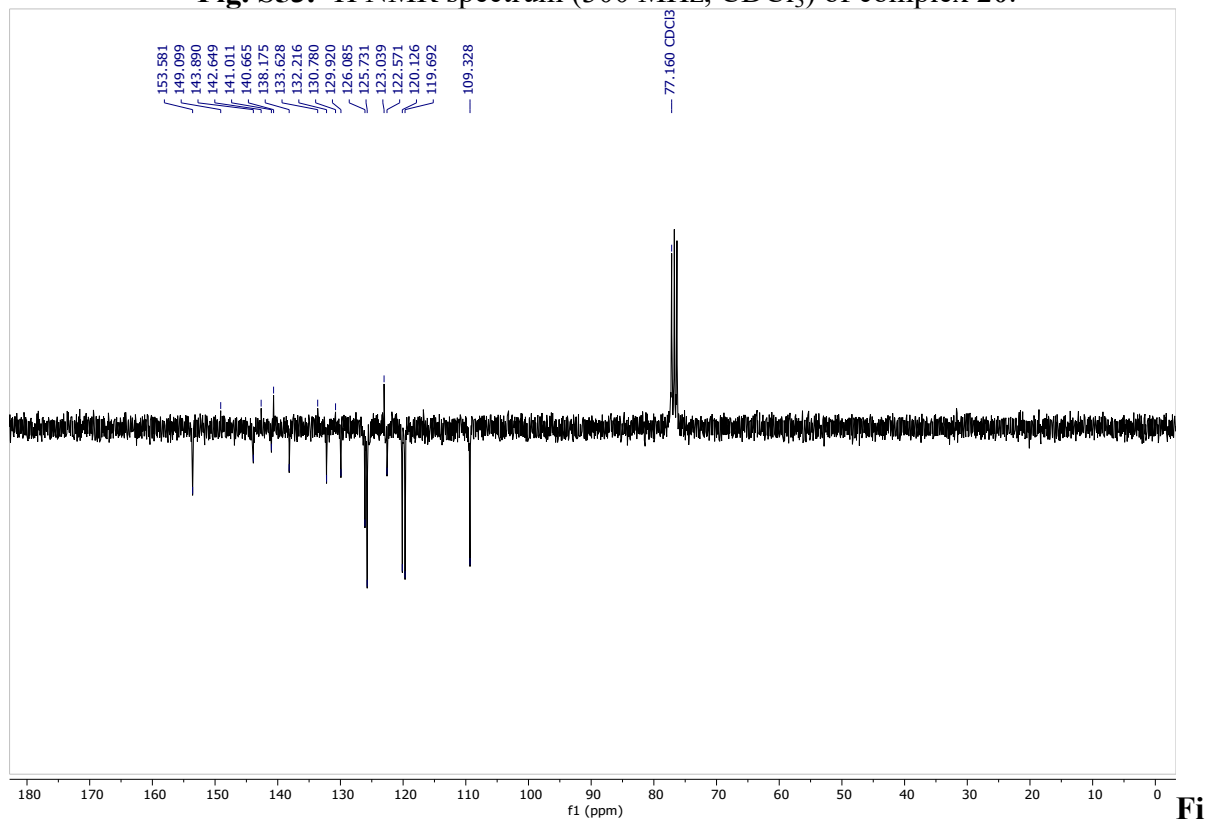

**g. S54.** <sup>13</sup>C NMR spectrum (75 MHz, CDCl<sub>3</sub>) of complex 20.

Fi

## Complex 21

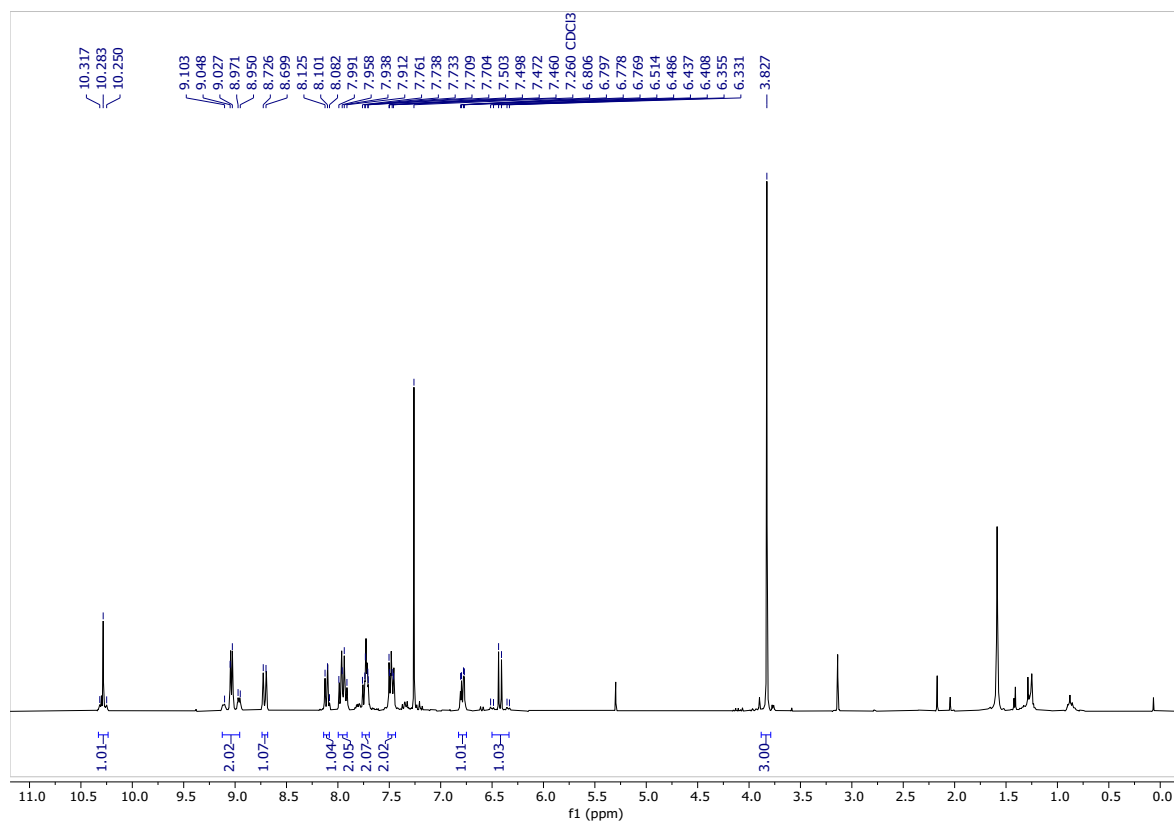

Fig. S55. <sup>1</sup>H NMR spectrum (300 MHz, CDCl<sub>3</sub>) of complex 21.

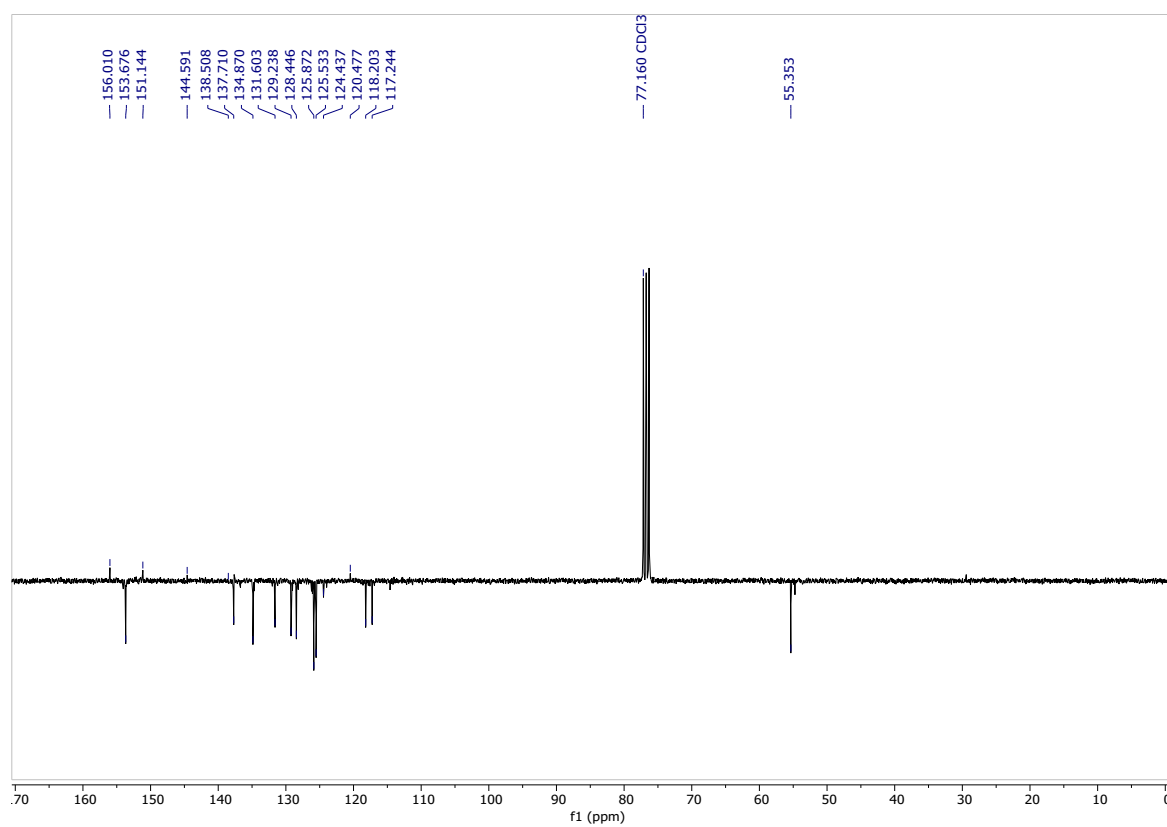

Fig. S56. <sup>13</sup>C NMR spectrum (75 MHz, CDCl<sub>3</sub>) of complex 21.

## Complex 22

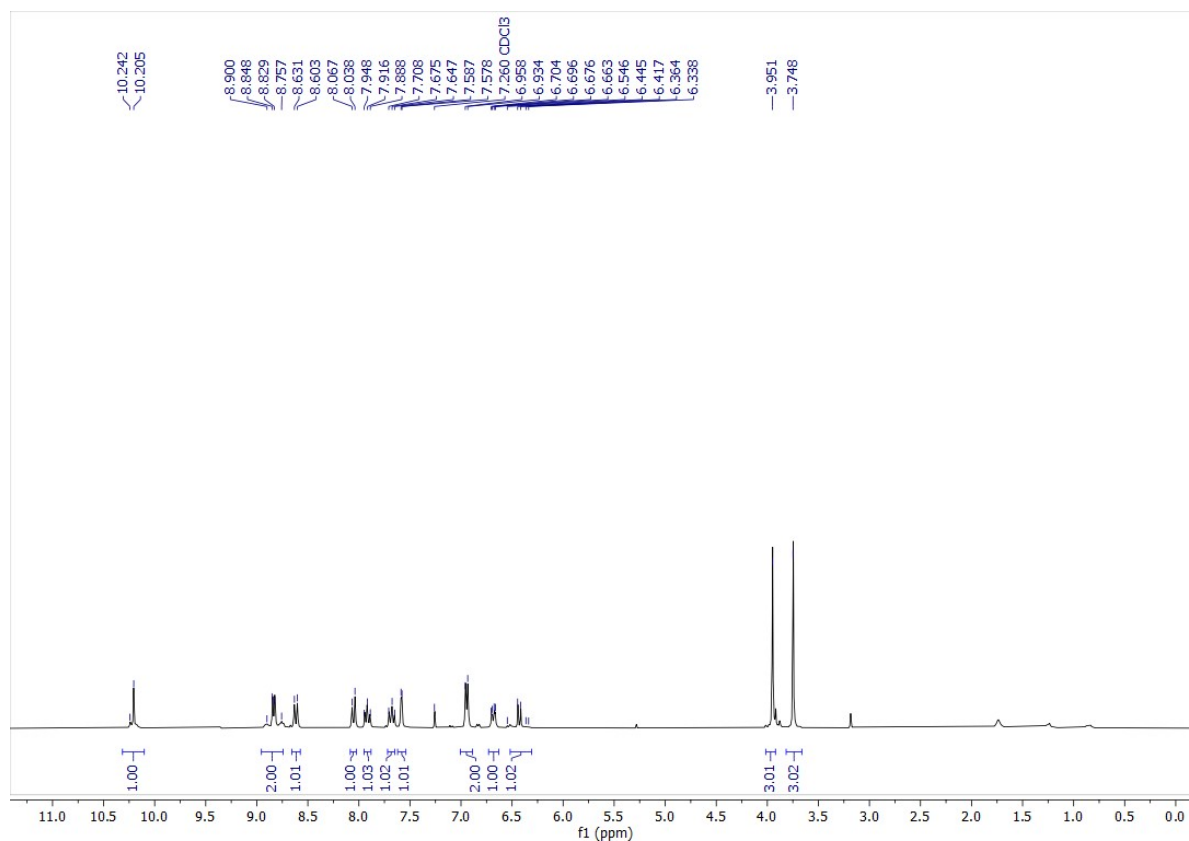

Fig. S57. <sup>1</sup>H NMR spectrum (300 MHz, CDCl<sub>3</sub>) of complex 22.

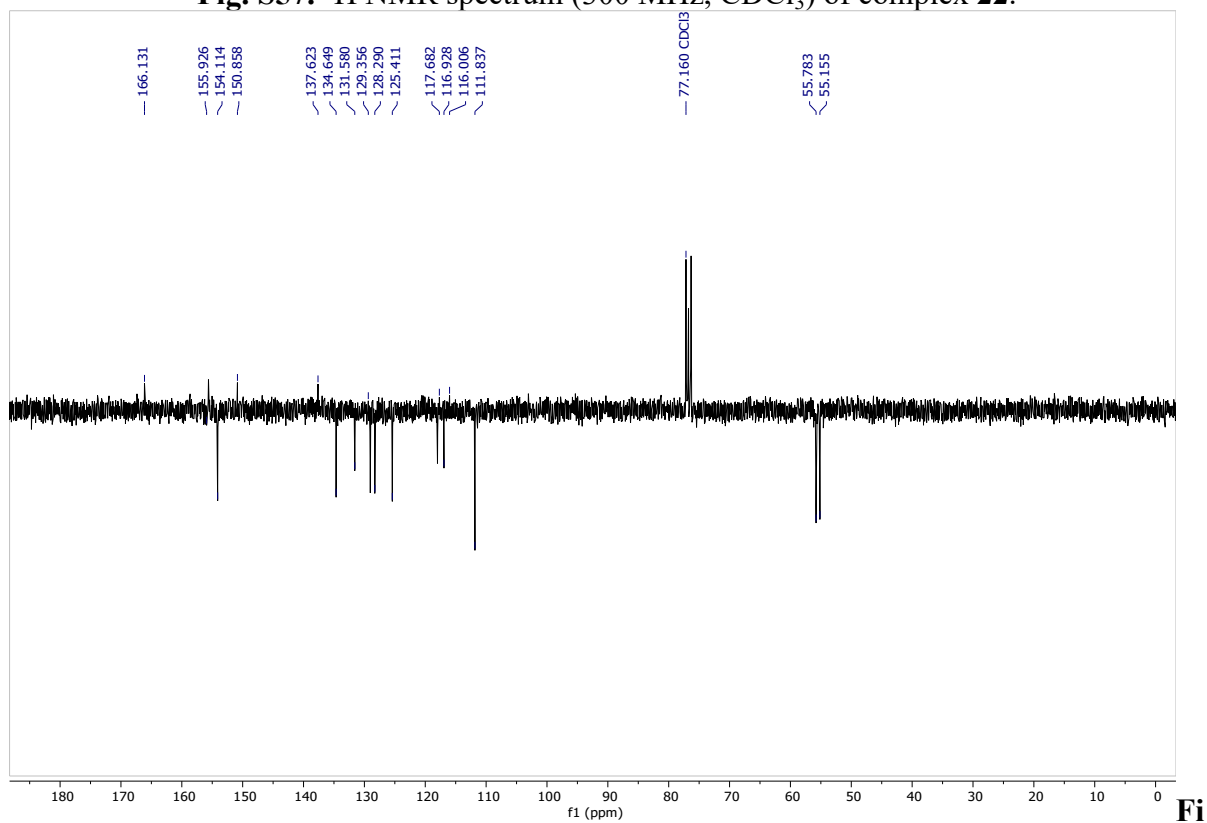

g. S58. <sup>13</sup>C NMR spectrum (75 MHz, CDCl<sub>3</sub>) of complex 22.

Fi

## Complex 23

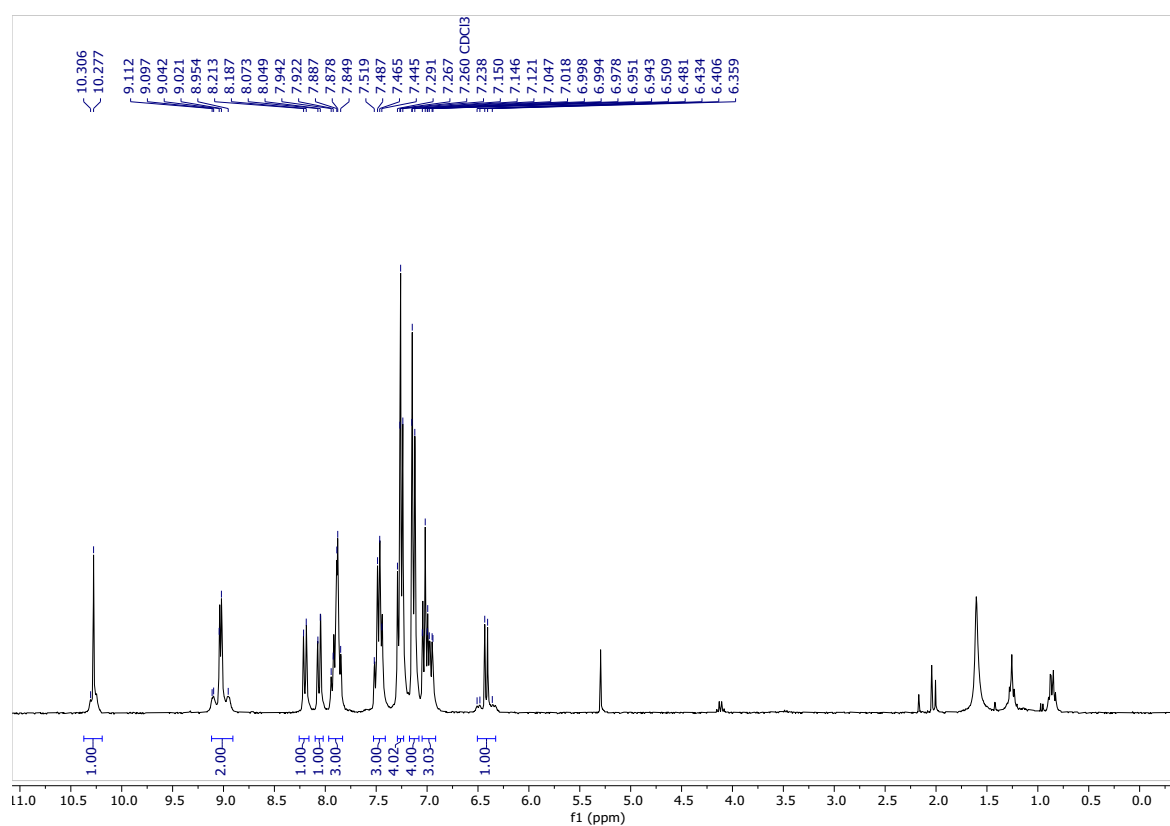

Fig. S59. <sup>1</sup>H NMR spectrum (300 MHz, CDCl<sub>3</sub>) of complex 23.

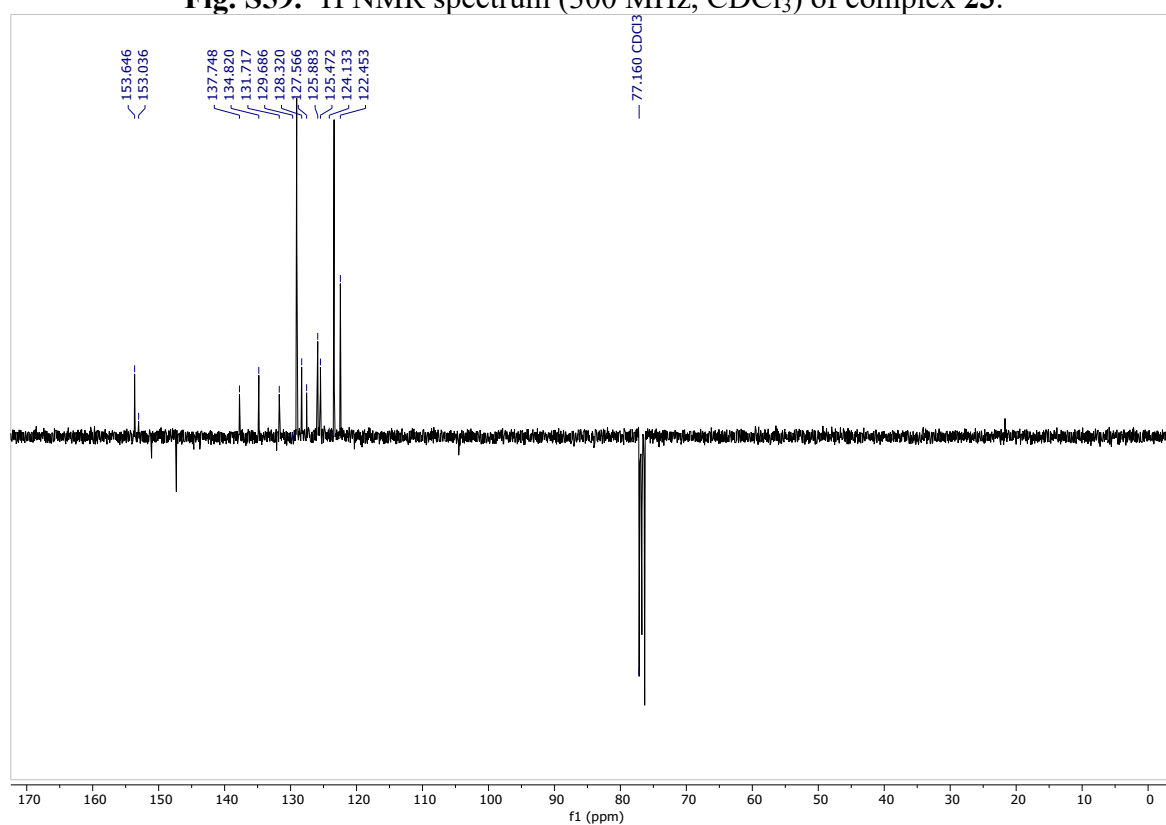

Fig. S60. <sup>13</sup>C NMR spectrum (75 MHz, CDCl<sub>3</sub>) of complex 23.

## Complex 24

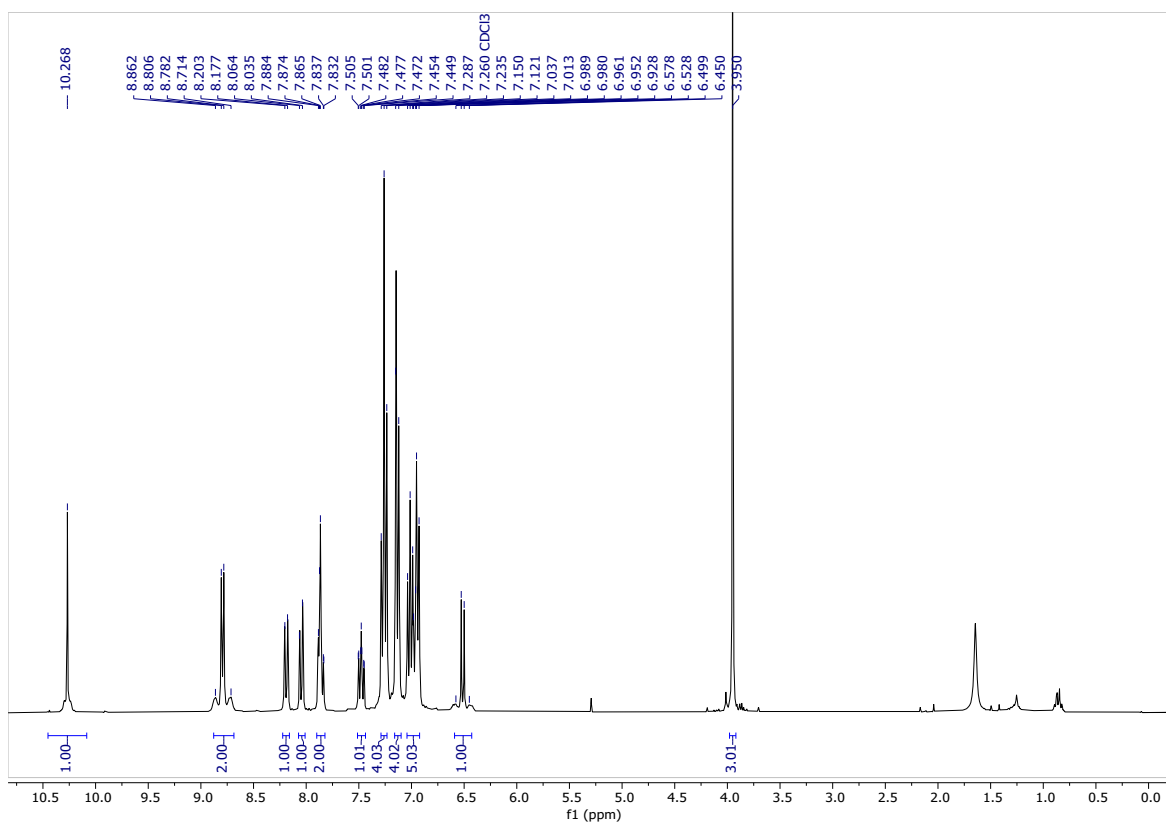

Fig. S61. <sup>1</sup>H NMR spectrum (300 MHz, CDCl<sub>3</sub>) of complex 24.

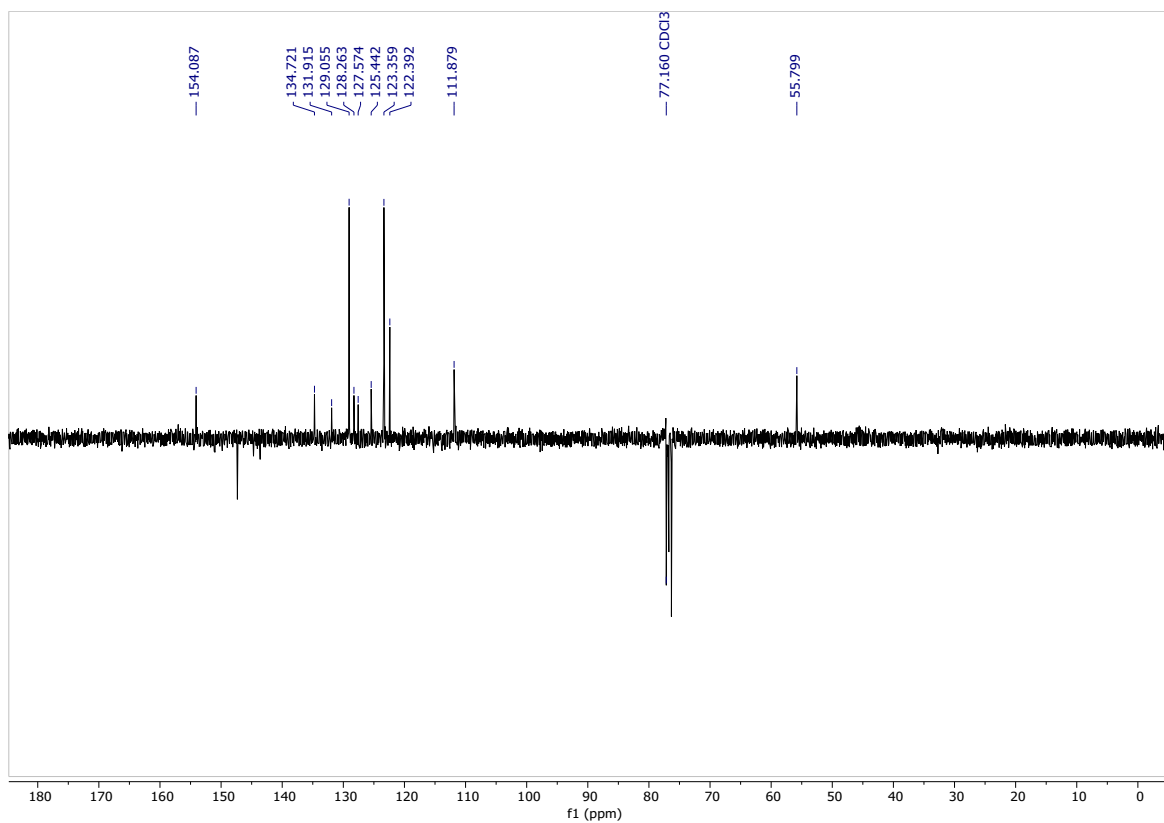



**Fig. S62.**  $^{13}\text{C}$  NMR spectrum (75 MHz,  $\text{CDCl}_3$ ) of complex **24**.

## Crystallographic Data

**Table S1** Crystallographic data for **7** + hexane ( $\text{C}_6\text{H}_{14}$ )

**Complex 7: crystal Data** for  $\text{C}_{28}\text{H}_{23}\text{ClN}_4\text{O Pt}$ , ( $M = 662.05$ ), triclinic, space group  $P-1$ ,  $a = 9.0087(9)$ ,  $b = 10.5776(12)$ ,  $c = 17.4264(19)$  Å,  $\alpha = 98.163(5)$ ,  $\beta = 104.652(4)$ ,  $\gamma = 101.634(5)$  °,  $V = 1540.6(3)$  Å<sup>3</sup>.  $Z = 2$ ,  $d = 1.613$  g.cm<sup>-3</sup>,  $\mu = 4.674$  mm<sup>-1</sup>. The structure was solved by dual-space algorithm using the SHELXT program,<sup>12</sup> and then refined with full-matrix least-square methods based on  $F^2$  (SHELXL).<sup>13</sup> All non-hydrogen atoms were refined with anisotropic atomic displacement parameters. H atoms were finally included in their calculated positions. A final refinement on  $F^2$  with 6996 unique intensities and 360 parameters converged at  $\omega R(F^2) = 0.0852$  ( $R(F) = 0.0424$ ) for 6467 observed reflections with  $I > 2\sigma(I)$ .

Crystallographic data for **7** + hexane ( $\text{C}_6\text{H}_{14}$ )

|                                      |                                                                    |                          |
|--------------------------------------|--------------------------------------------------------------------|--------------------------|
| Compound                             | <b>7</b>                                                           |                          |
| Empirical formula                    | $\text{C}_{34}\text{H}_{37}\text{ClN}_4\text{O Pt}$                |                          |
| CCDC                                 | 2211426                                                            |                          |
| Formula weight                       | 748.21                                                             |                          |
| Temperature                          | 150 K                                                              |                          |
| Wavelength                           | 0.71073 Å                                                          |                          |
| Crystal system                       | Triclinic                                                          |                          |
| Space group                          | $P-1$                                                              |                          |
| Unit cell dimensions                 | $a = 9.0087(9)$ Å                                                  | $a = 98.163(5)$ °.       |
|                                      | $b = 10.5776(12)$ Å                                                | $b = 104.652(4)$ °.      |
|                                      | $c = 17.4264(19)$ Å                                                | $\gamma = 101.634(5)$ °. |
| Volume                               | $1540.6(3)$ Å <sup>3</sup>                                         |                          |
| Z                                    | 2                                                                  |                          |
| Density (calculated)                 | $1.613$ g/cm <sup>3</sup>                                          |                          |
| Absorption coefficient               | $4.674$ mm <sup>-1</sup>                                           |                          |
| $F(000)$                             | 744                                                                |                          |
| Crystal size                         | 0.480 x 0.420 x 0.130 mm                                           |                          |
| Crystal color                        | orange                                                             |                          |
| Theta range for data collection      | 2.132 to 27.475°.                                                  |                          |
| Index ranges                         | $-11 \leq h \leq 11$ , $-13 \leq k \leq 13$ , $-22 \leq l \leq 22$ |                          |
| Reflections collected                | 20079                                                              |                          |
| Independent reflections              | 6996 [ $R(\text{int}) = 0.0472$ ]                                  |                          |
| Reflections [ $I > 2\sigma(I)$ ]     | 6467                                                               |                          |
| Completeness to theta max            | 98.9 %                                                             |                          |
| Absorption correction                | multi-scan                                                         |                          |
| Max. and min. transmission           | 0.545 and 0.269                                                    |                          |
| Refinement method                    | Full-matrix least-squares on $F^2$                                 |                          |
| Data / restraints / parameters       | 6996 / 19 / 360                                                    |                          |
| Goodness-of-fit on $F^2$             | 1.102                                                              |                          |
| Final R indices [ $I > 2\sigma(I)$ ] | $R_1 = 0.0299$ , $wR_2 = 0.0742$                                   |                          |
| R indices (all data)                 | $R_1 = 0.0328$ , $wR_2 = 0.0753$                                   |                          |
| Largest diff. peak and hole          | 1.873 and -0.993 e.Å <sup>-3</sup>                                 |                          |

**Table S2** Crystallographic data for **12**

**Complex 12: crystal Data** for  $C_{21}H_{16}ClN_3Pt$ , ( $M = 540.91$ ), monoclinic, space group P 21/c (I.T.#14),  $a = 11.6802(10)$ ,  $b = 7.3821(7)$ ,  $c = 20.8746(18)$  Å,  $\alpha = 90^\circ$ ,  $\beta = 94.571(3)$ ,  $\gamma = 90^\circ$ ,  $V = 1794.2(3)$  Å<sup>3</sup>.  $Z = 4$ ,  $d = 2.002$  g.cm<sup>-3</sup>,  $\mu = 7.979$  mm<sup>-1</sup>. The structure was solved by dual-space algorithm using the SHELXT program,<sup>12</sup> and then refined with full-matrix least-square methods based on  $F^2$  (SHELXL).<sup>13</sup> All non-hydrogen atoms were refined with anisotropic atomic displacement parameters. H atoms were finally included in their calculated positions. A final refinement on  $F^2$  with 4075 unique intensities and 235 parameters converged at  $\omega R(F^2) = 0.0699$  ( $R(F) = 0.0285$ ) for 3545 observed reflections with  $I > 2\sigma(I)$ .

| Crystallographic data for <b>12</b>  |                                                                                                                                |
|--------------------------------------|--------------------------------------------------------------------------------------------------------------------------------|
| Compound                             | <b>12</b>                                                                                                                      |
| Empirical formula                    | C <sub>21</sub> H <sub>16</sub> Cl N <sub>3</sub> Pt                                                                           |
| CCDC                                 | 2211427                                                                                                                        |
| Formula weight                       | 540.91                                                                                                                         |
| Temperature                          | 150(2) K                                                                                                                       |
| Wavelength                           | 0.71073 Å                                                                                                                      |
| Crystal system                       | Monoclinic                                                                                                                     |
| Space group                          | P 21/c (I.T.#14)                                                                                                               |
| Unit cell dimensions                 | $a = 11.6802(10)$ Å $a = 90^\circ$ .<br>$b = 7.3821(7)$ Å $b = 94.571(3)^\circ$ .<br>$c = 20.8746(18)$ Å $\gamma = 90^\circ$ . |
| Volume                               | 15794.2(3) Å <sup>3</sup>                                                                                                      |
| Z                                    | 4                                                                                                                              |
| Density (calculated)                 | 2.002 g/cm <sup>3</sup>                                                                                                        |
| Absorption coefficient               | 7.979 mm <sup>-1</sup>                                                                                                         |
| F(000)                               | 1032                                                                                                                           |
| Crystal size                         | 0.280 x 0.120 x 0.070 mm                                                                                                       |
| Crystal color                        | yellow                                                                                                                         |
| Theta range for data collection      | 1.749 to 27.486°.                                                                                                              |
| Index ranges                         | -15 ≤ h ≤ 15, -9 ≤ k ≤ 9, -27 ≤ l ≤ 23                                                                                         |
| Reflections collected                | 18884                                                                                                                          |
| Independent reflections              | 4075 [ $R(\text{int}) = 0.0591$ ]                                                                                              |
| Reflections [ $I > 2\sigma(I)$ ]     | 3545                                                                                                                           |
| Completeness to theta max            | 98.8 %                                                                                                                         |
| Absorption correction                | multi-scan                                                                                                                     |
| Max. and min. transmission           | 0.572 and 0.338                                                                                                                |
| Refinement method                    | Full-matrix least-squares on $F^2$                                                                                             |
| Data / restraints / parameters       | 4075 / 0 / 235                                                                                                                 |
| Goodness-of-fit on $F^2$             | 1.105                                                                                                                          |
| Final R indices [ $I > 2\sigma(I)$ ] | $R_1 = 0.0285$ , $wR_2 = 0.0699$                                                                                               |
| R indices (all data)                 | $R_1 = 0.0337$ , $wR_2 = 0.0733$                                                                                               |
| Largest diff. peak and hole          | 1.100 and -1.404 e.Å <sup>-3</sup>                                                                                             |

**Table S3:** Crystallographic data for **14**+ 0.5 EtOAc

**Complex 14: crystal Data** for C<sub>27</sub> H<sub>20</sub> Cl N<sub>4</sub> Pt, (*M* = 5631.02), monoclinic, space group P 21/n, *a* = 12.4061(3), *b* = 7.9544(2), *c* = 25.2752(5) Å,  $\alpha = 90^\circ$ ,  $\beta = 94.2180(10)$ ,  $\gamma = 90^\circ$ , *V* = 1794.2(3) Å<sup>3</sup>. *Z* = 4, *d* = 1.800 g.cm<sup>-3</sup>,  $\mu = 5.779$  mm<sup>-1</sup>. The structure was solved by dual-space algorithm using the SHELXT program,<sup>12</sup> and then refined with full-matrix least-square methods based on *F*<sup>2</sup> (SHELXL).<sup>13</sup> All non-hydrogen atoms were refined with anisotropic atomic displacement parameters. H atoms were finally included in their calculated positions. A final refinement on *F*<sup>2</sup> with 5683 unique intensities and 322 parameters converged at  $\omega R(F^2) = 0.0644$  (*R*(*F*) = 0.0281) for 4968 observed reflections with *I* > 2 $\sigma$ (*I*).

| Crystallographic data for <b>14</b> + 0.5 EtOAc              |                                                                                                                                       |
|--------------------------------------------------------------|---------------------------------------------------------------------------------------------------------------------------------------|
| Compound                                                     | <b>14</b>                                                                                                                             |
| Empirical formula                                            | C <sub>29</sub> H <sub>23</sub> Cl N <sub>4</sub> O Pt                                                                                |
| CCDC                                                         | 2211428                                                                                                                               |
| Formula weight                                               | 674.05                                                                                                                                |
| Temperature                                                  | 150 K                                                                                                                                 |
| Wavelength                                                   | 0.71073 Å                                                                                                                             |
| Crystal system                                               | Monoclinic, P 21/n                                                                                                                    |
| Space group                                                  | P 21/c (I.T.#14)                                                                                                                      |
| Unit cell dimensions                                         | <i>a</i> = 12.4061(3) Å <i>a</i> = 90°.<br><i>b</i> = 7.9544(2) Å <i>b</i> = 94.2180(10)°.<br><i>c</i> = 25.2752(5) Å <i>c</i> = 90°. |
| Volume                                                       | 2487.48(10) Å <sup>3</sup>                                                                                                            |
| <i>Z</i>                                                     | 4                                                                                                                                     |
| Density (calculated)                                         | 1.800 g/cm <sup>3</sup>                                                                                                               |
| Absorption coefficient                                       | 5.779 mm <sup>-1</sup>                                                                                                                |
| <i>F</i> (000)                                               | 1312                                                                                                                                  |
| Crystal size                                                 | 0.340 x 0.220 x 0.200 mm                                                                                                              |
| Crystal color                                                | yellow                                                                                                                                |
| Theta range for data collection                              | 2.685 to 27.477°.                                                                                                                     |
| Index ranges                                                 | -16 ≤ <i>h</i> ≤ 15, -9 ≤ <i>k</i> ≤ 10, -32 ≤ <i>l</i> ≤ 32                                                                          |
| Reflections collected                                        | 19769                                                                                                                                 |
| Independent reflections                                      | 5683 [ <i>R</i> (int) = 0.0421]                                                                                                       |
| Reflections [ <i>I</i> > 2 $\sigma$ ( <i>I</i> )]            | 4968                                                                                                                                  |
| Completeness to theta max                                    | 99.7 %                                                                                                                                |
| Absorption correction                                        | multi-scan                                                                                                                            |
| Max. and min. transmission                                   | 0.315 and 0.191                                                                                                                       |
| Refinement method                                            | Full-matrix least-squares on <i>F</i> <sup>2</sup>                                                                                    |
| Data / restraints / parameters                               | 5683 / 15 / 322                                                                                                                       |
| Goodness-of-fit on <i>F</i> <sup>2</sup>                     | 1.061                                                                                                                                 |
| Final <i>R</i> indices [ <i>I</i> > 2 $\sigma$ ( <i>I</i> )] | <i>R</i> <sub>1</sub> = 0.0281, <i>wR</i> <sub>2</sub> = 0.0644                                                                       |
| <i>R</i> indices (all data)                                  | <i>R</i> <sub>1</sub> = 0.0344, <i>wR</i> <sub>2</sub> = 0.0660                                                                       |
| Largest diff. peak and hole                                  | 1.808 and -1.323 e.Å <sup>-3</sup>                                                                                                    |

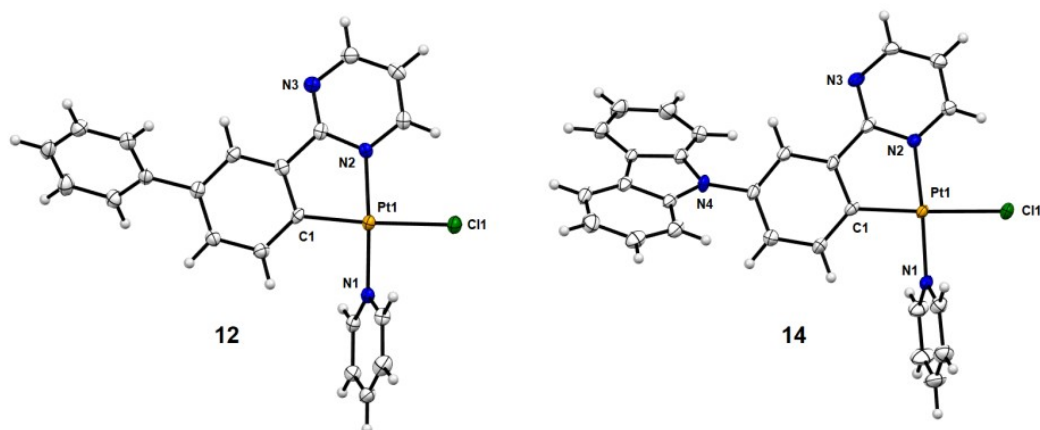

**Fig. 63.** ORTEP representation of complexes **12**, and **14** with 50% ellipsoid probability. All co-crystallized solvent molecules have been omitted for clarity.

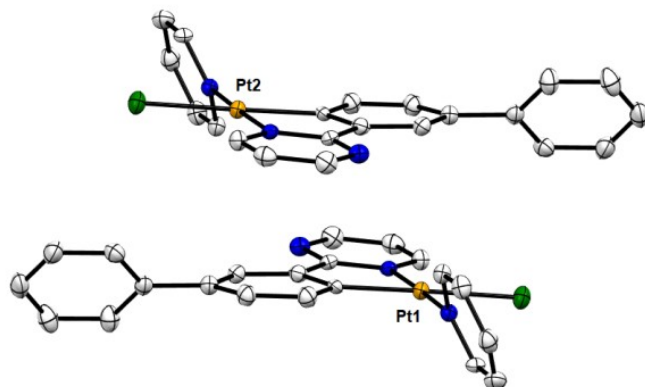

**Fig. 64.** ORTEP representation of the crystal packing structure in dimeric form: complex **12** showing the head-to-tail configuration. Thermal ellipsoids are set at 50% probability level. Hydrogen atoms and all co-crystallized solvent molecules have been omitted for clarity.

## Additional Cyclic Voltammetry

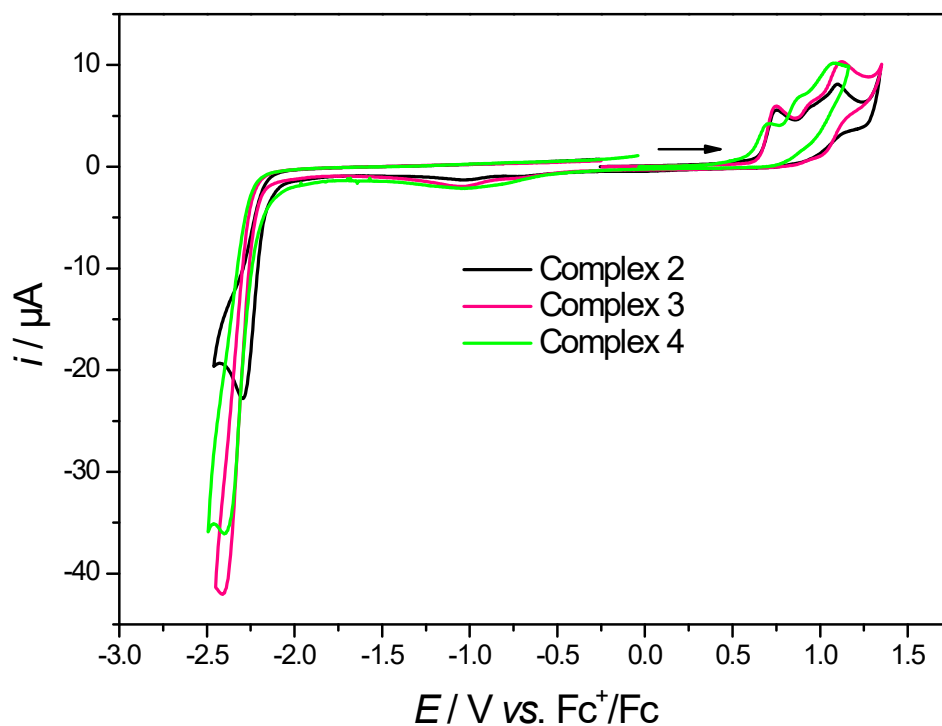

**Fig. S65.** Cyclic voltammograms of complexes **2** (black), **3** (red) and **4** (green) at a Pt working electrode in  $\text{CH}_2\text{Cl}_2/\text{NBu}_4\text{PF}_6$  0.1 M ( $E$  / V vs.  $\text{Fc}^+/\text{Fc}$ ,  $\nu = 0.1 \text{ V s}^{-1}$ ,  $C = 0.5 \text{ mM}$ ). The arrow indicates the scanning direction from the initial potential.

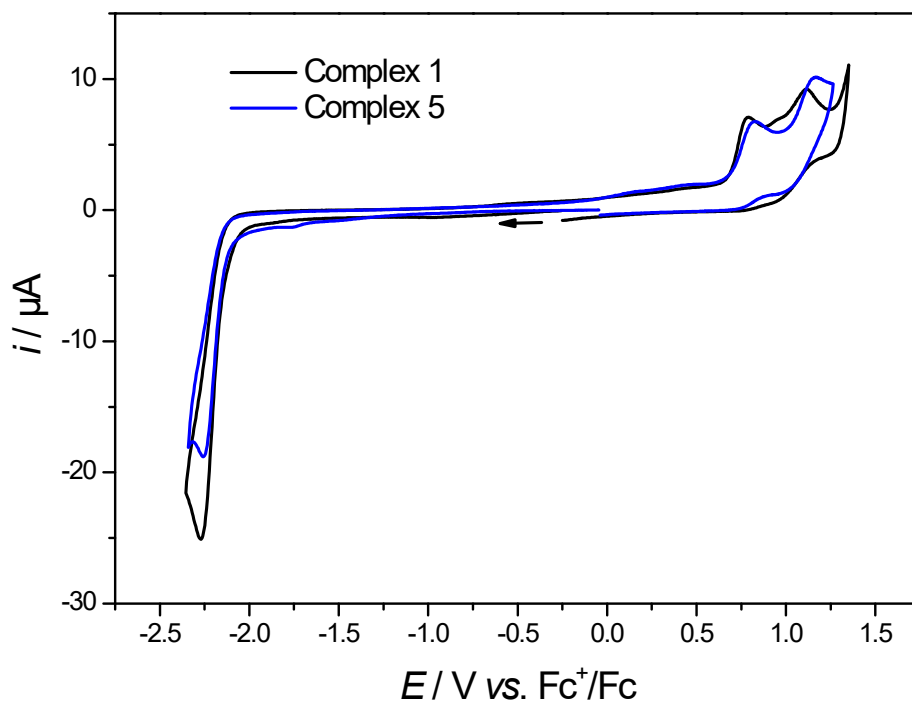

**Fig. S66.** Cyclic voltammograms of complexes **1** (black) and **5** (blue) at a Pt working electrode in  $\text{CH}_2\text{Cl}_2/\text{NBu}_4\text{PF}_6$  0.1 M ( $E / \text{V vs. Fc}^+/\text{Fc}$ ,  $\nu = 0.1 \text{ V s}^{-1}$ ,  $C = 0.5 \text{ mM}$ ). The arrow indicates the scanning direction from the initial potential.

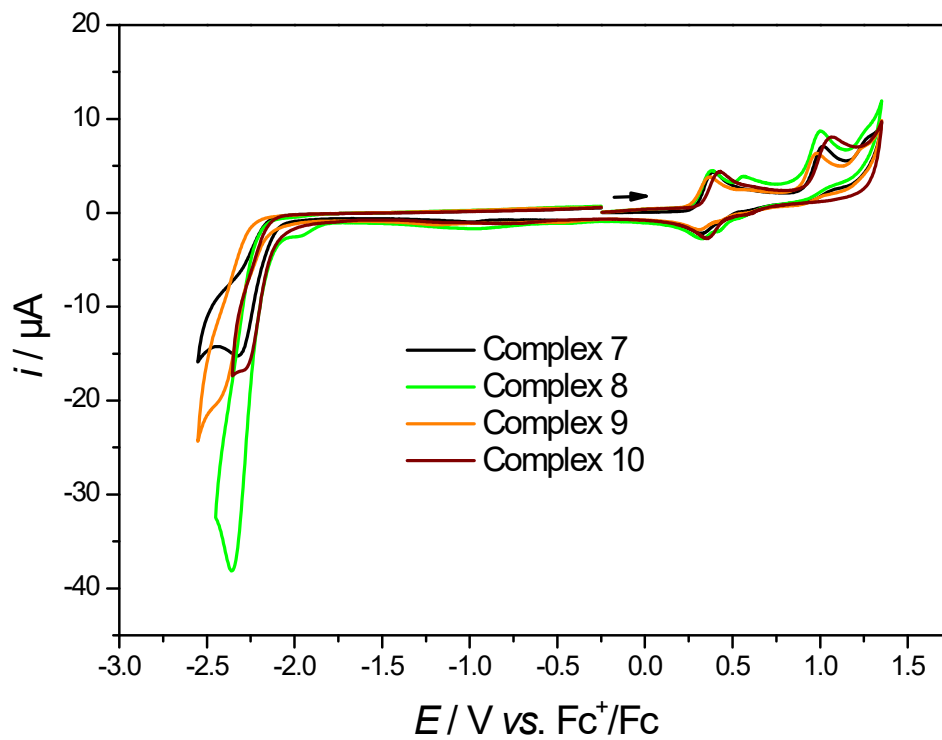

**Fig. S67.** Cyclic voltammograms of complexes **7** (black), **8** (green), **9** (orange) and **10** (brown) at a Pt working electrode in  $\text{CH}_2\text{Cl}_2/\text{NBu}_4\text{PF}_6$  0.1 M ( $E$  / V vs.  $\text{Fc}^+/\text{Fc}$ ,  $\nu = 0.1 \text{ V s}^{-1}$ ,  $C = 0.5 \text{ mM}$ ). The arrow indicates the scanning direction from the initial potential.

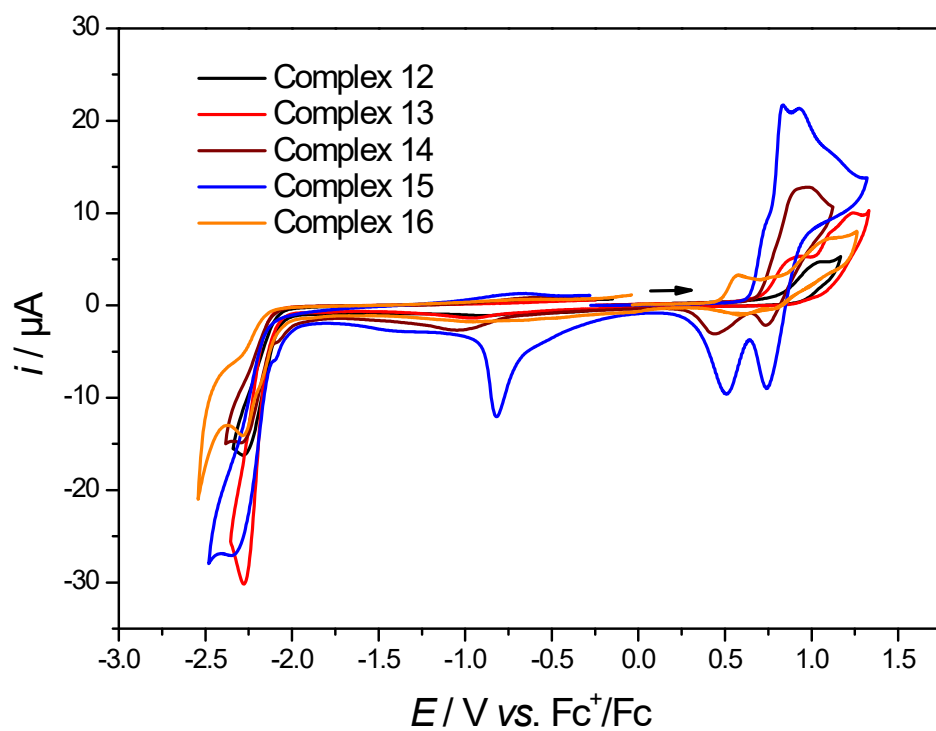

**Fig. S68.** Cyclic voltammograms of complexes **12** (black), **13** (red), **14** (brown), **15** (blue) and **16** (orange) at a Pt working electrode in  $\text{CH}_2\text{Cl}_2/\text{NBu}_4\text{PF}_6$  0.1 M ( $E / \text{V vs. Fc}^+/\text{Fc}$ ,  $\nu = 0.1 \text{ V s}^{-1}$ ,  $C = 0.5 \text{ mM}$ ). The arrow indicates the scanning direction from the initial potential.



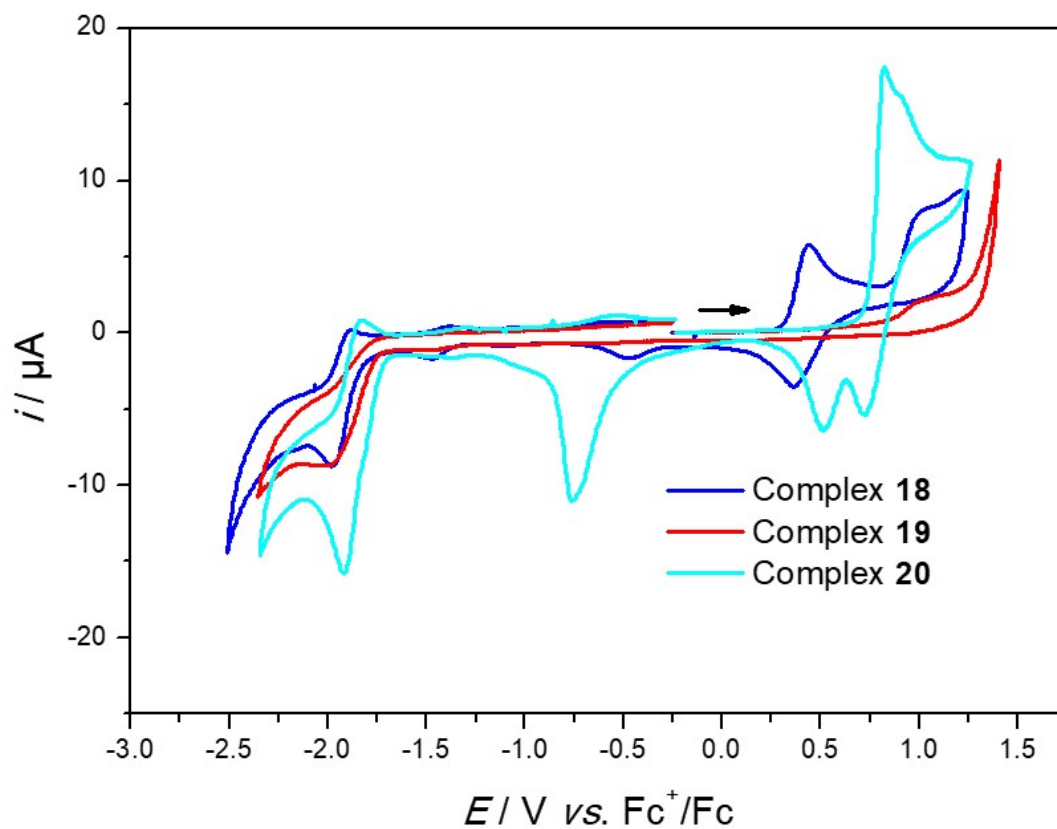

**Fig. S69.** Cyclic voltammograms of complexes **18** (blue), **19** (red) and **20** (cyan) at a Pt working electrode in  $\text{CH}_2\text{Cl}_2/\text{NBu}_4\text{PF}_6$  0.1 M ( $E / \text{V vs. Fc}^+/\text{Fc}$ ,  $\nu = 0.1 \text{ V s}^{-1}$ ,  $C = 0.5 \text{ mM}$ ). The arrow indicates the scanning direction from the initial potential.

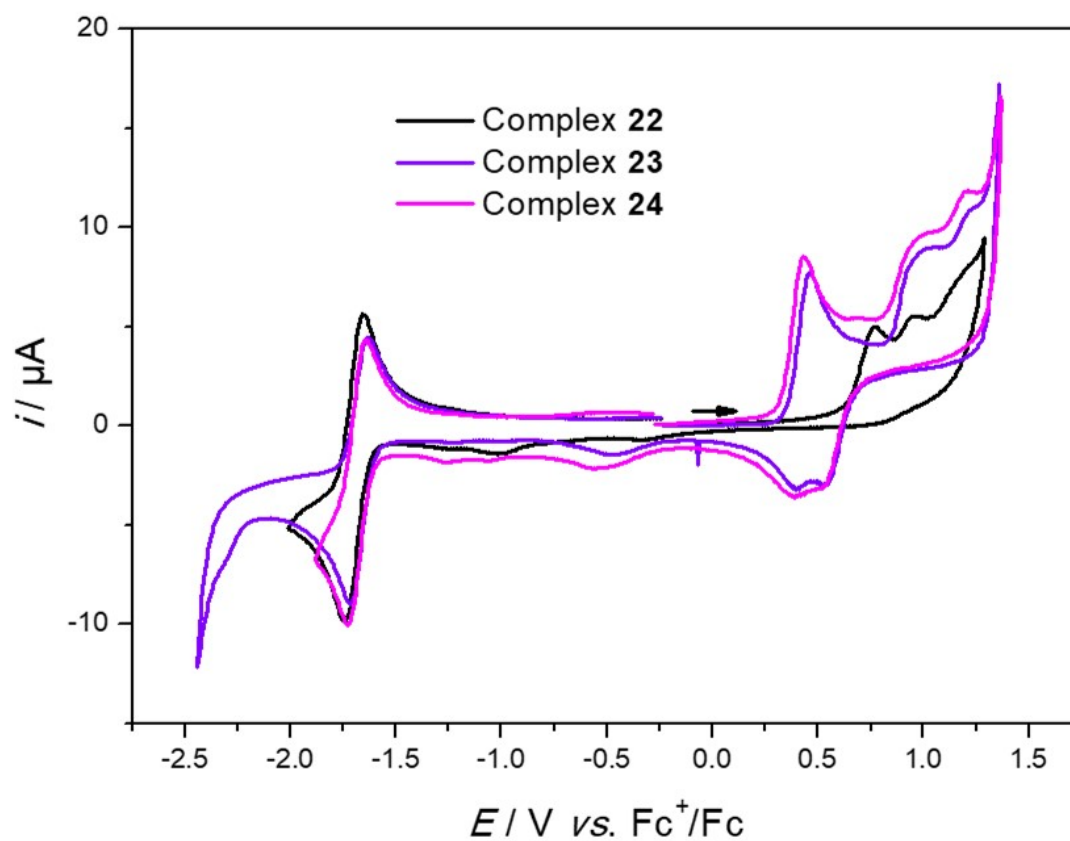

**Fig. S70.** Cyclic voltammograms of complexes **22** (black), **23** (blue) and **24** (pink) at a Pt working electrode in  $\text{CH}_2\text{Cl}_2/\text{NBu}_4\text{PF}_6$  0.1 M ( $E$  / V vs.  $\text{Fc}^+/\text{Fc}$ ,  $\nu = 0.1 \text{ V s}^{-1}$ ,  $C = 0.5 \text{ mM}$ ). The arrow indicates the scanning direction from the initial potential.

## Additional Photophysical Data

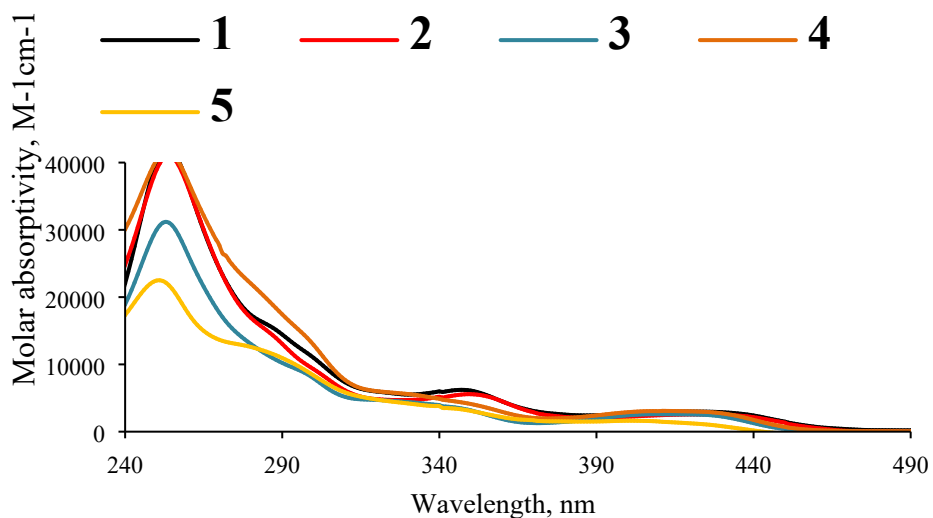

**Fig. S71:** Absorption spectra of phenylpyrimidine complexes **1-5** in DCM solution ( $C \sim 10^{-5}$  M).

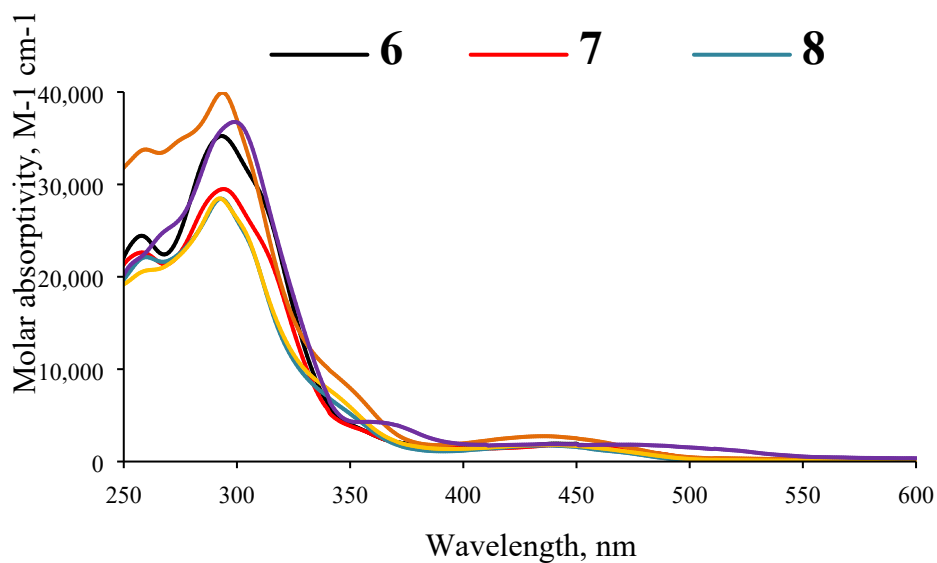

**Fig. S72:** Absorption spectra of phenylpyrimidine complexes **6 – 11** in DCM solution ( $C \sim 10^{-5}$  M).

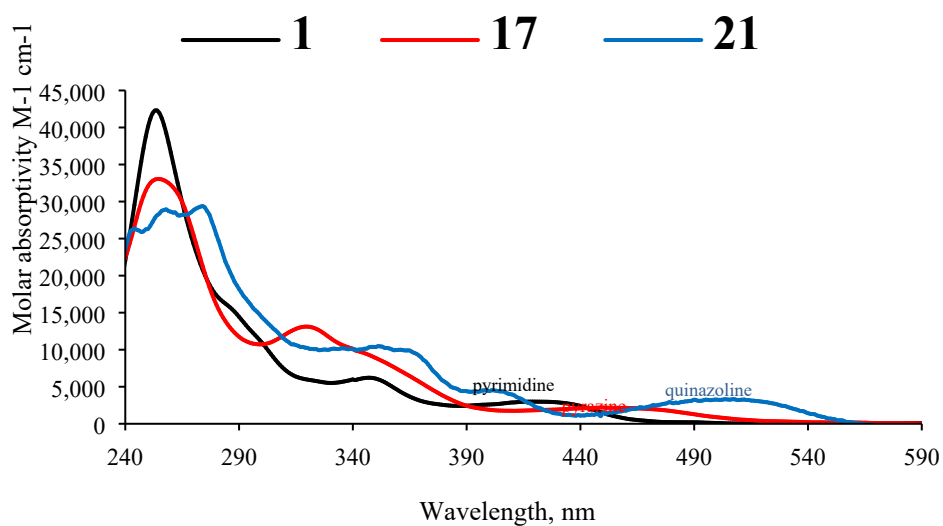

**Fig. S73:** Absorption spectra of methoxy complexes **1**, **17** and **21** in DCM solution ( $C \sim 10^{-5}$  M).

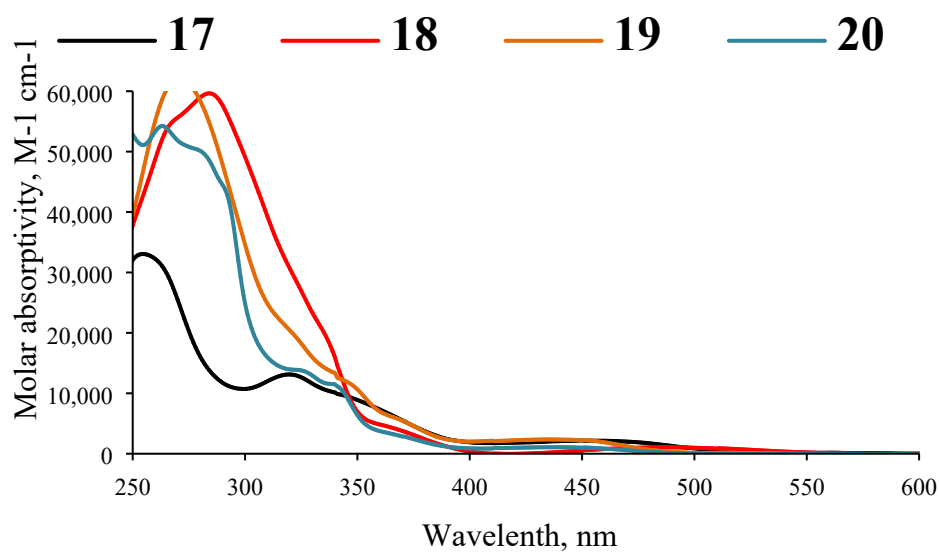

**Fig. S74:** Absorption spectra of phenylpyrazine complexes **17** – **20** in DCM solution ( $C \sim 10^{-5}$  M).

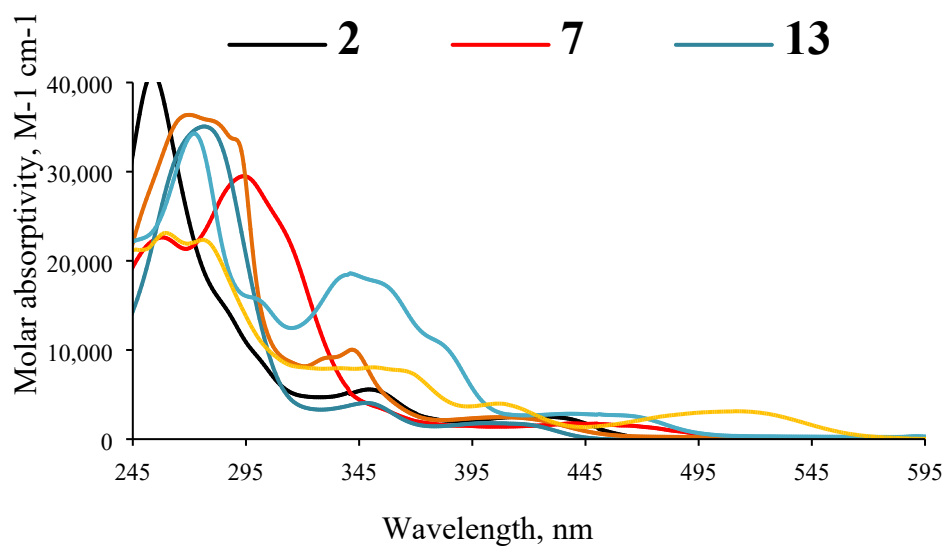

**Fig. S75:** Absorption spectra of phenylpyrimidine complexes **2**, **7**, **13**, **15**, **16** and **22** in DCM solution ( $C \sim 10^{-5}$  M).

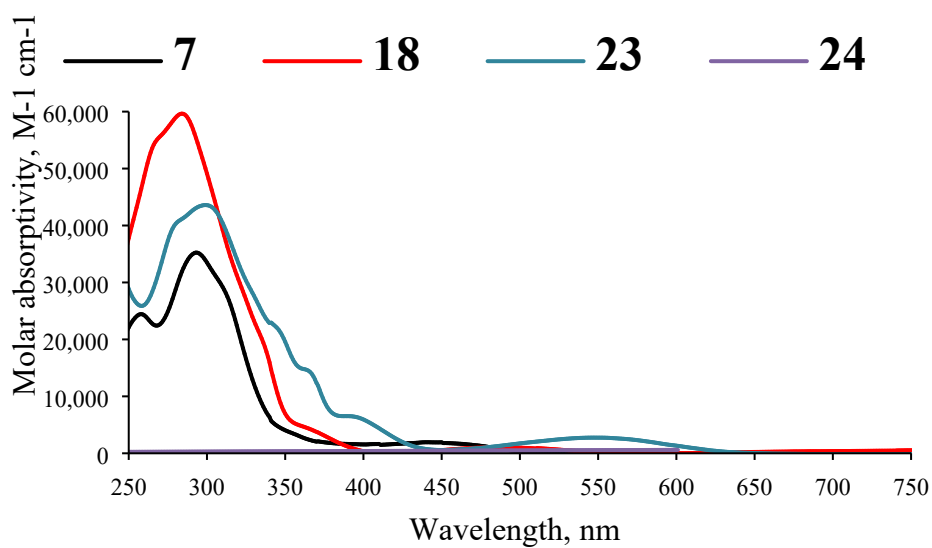

**Fig. S76:** Absorption spectra of diphenylamino-complexes **7**, **19**, **23** and **24** in DCM solution ( $C \sim 10^{-5}$  M).

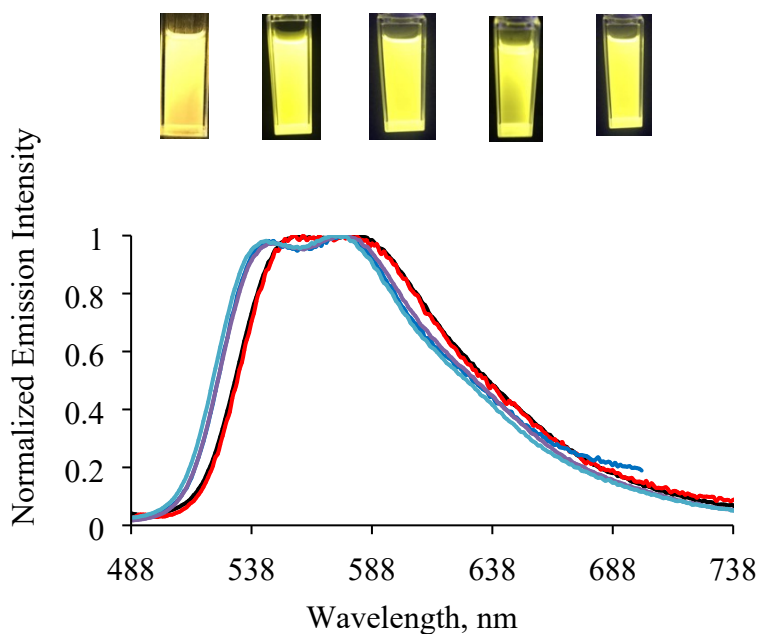

**Fig. S77:** Normalized Emission spectra of phenylpyrimidine complexes **1-5** in deoxygenated DCM solution ( $C \sim 10^{-5}$  M).  $\lambda_{exc} = \lambda_{abs_{max}}^{abs}$  of the lowest energy band. Inset: picture of DCM solution taken under UV irradiation.

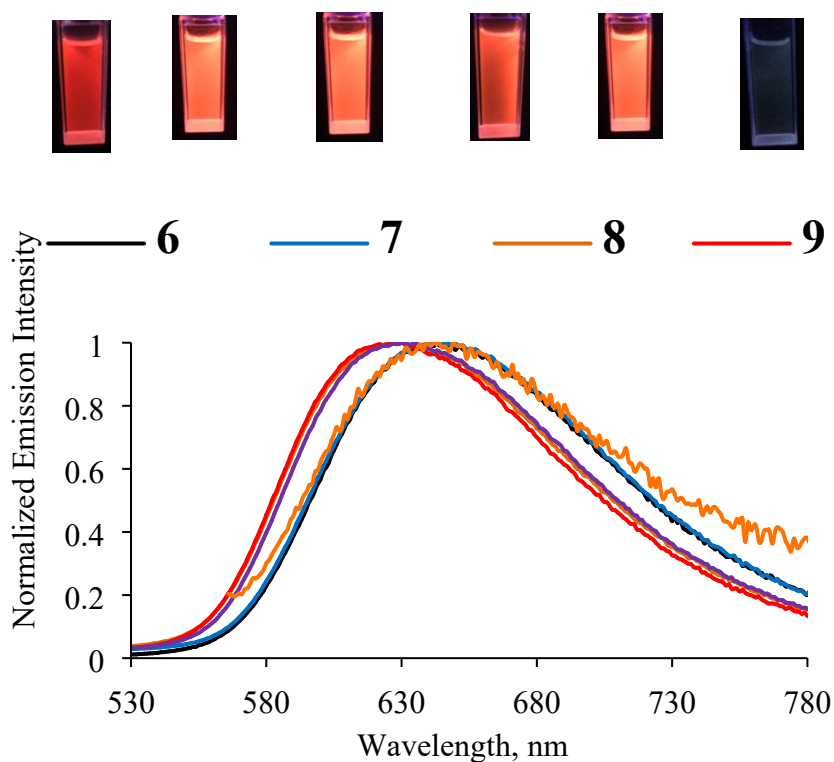

**Fig. S78:** Normalized Emission spectra of phenylpyrimidine complexes **6-11** in deoxygenated DCM solution ( $C \sim 10^{-5}$  M).  $\lambda_{exc} = \lambda_{abs_{max}}^{abs}$  of the lowest energy band. Inset: picture of DCM solution taken under UV irradiation.

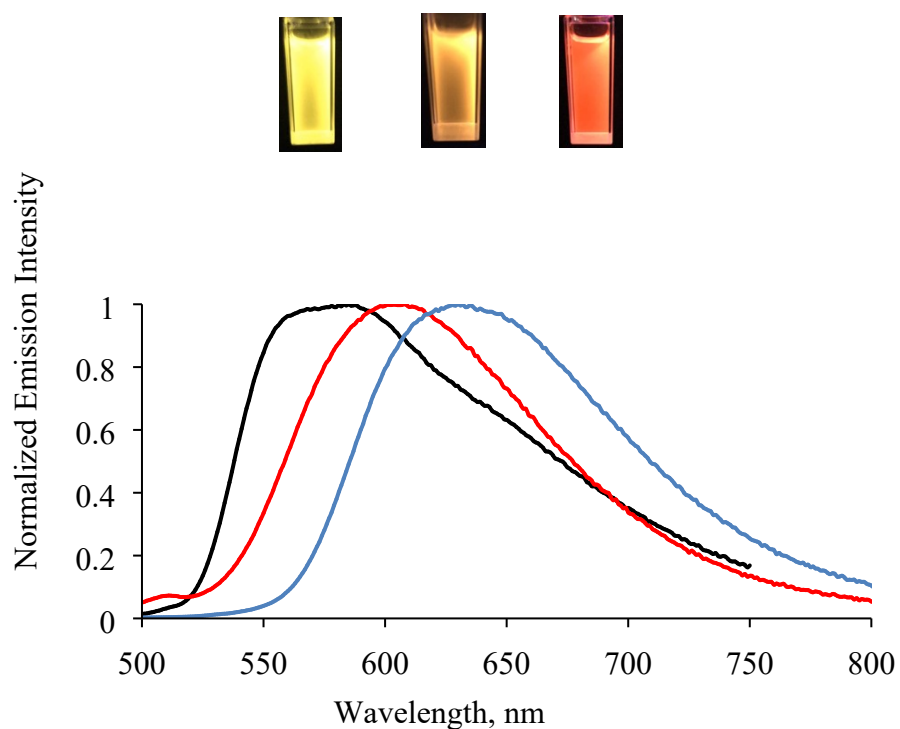

**Fig. S79:** Normalized Emission spectra of phenylpyrazine complexes **17**, **19** and **20** in deoxygenated DCM solution ( $C \sim 10^{-5}$  M).  $\lambda_{exc} = \lambda_{max}^{abs}$  of the lowest energy band. Inset: picture of DCM solution taken under UV irradiation.

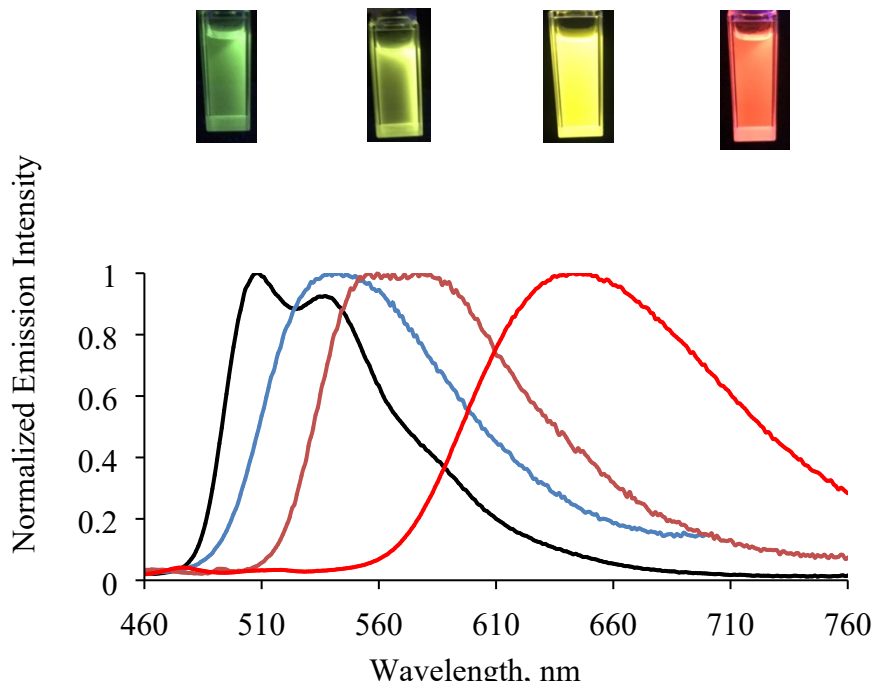

**Fig. S80:** Normalized Emission spectra of phenylpyrimidine complexes **2**, **7**, **13** and **15** in deoxygenated DCM solution ( $C \sim 10^{-5}$  M).  $\lambda_{exc} = \lambda_{max}^{abs}$  of the lowest energy band. Inset: picture of DCM solution taken under UV irradiation.

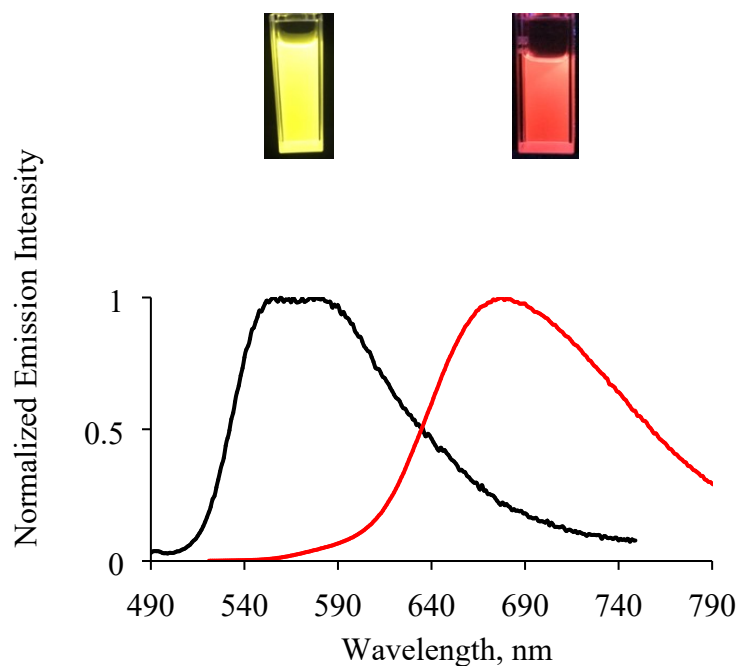

**Fig. S81:** Normalized Emission spectra of phenyldiazine complexes **2** and **22** in deoxygenated DCM solution ( $C \sim 10^{-5}$  M).  $\lambda_{exc} = \lambda_{abs_{max}}^{abs}$  of the lowest energy band. Inset: picture of DCM solution taken under UV irradiation.

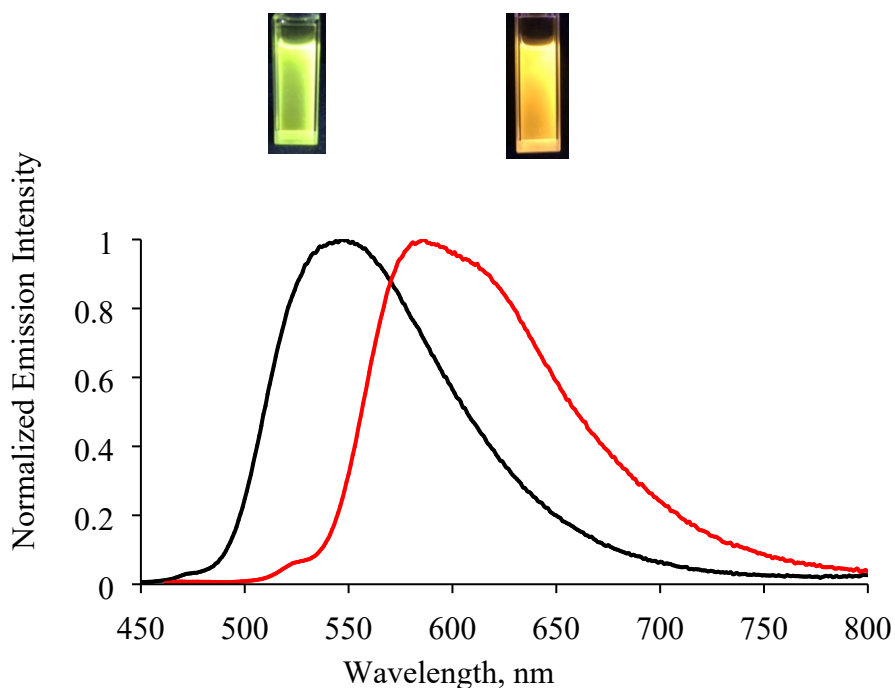

**Fig. S82:** Normalized Emission spectra of complexes **14** and **16** in deoxygenated DCM solution ( $C \sim 10^{-5}$  M).  $\lambda_{exc} = \lambda_{abs_{max}}^{abs}$  of the lowest energy band. Inset: picture of DCM solution taken under UV irradiation.



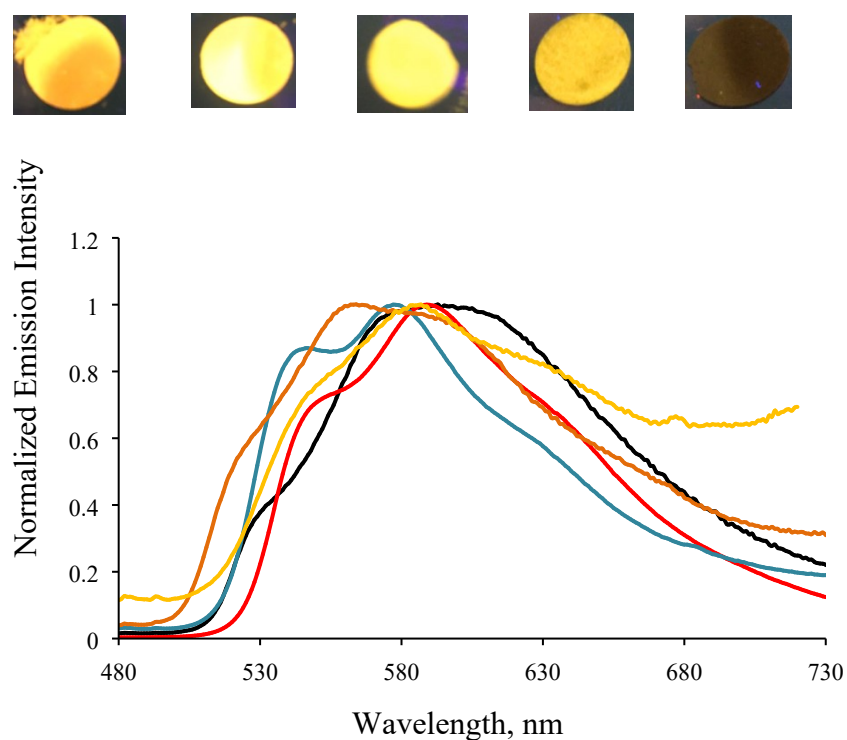

**Fig. S83:** Solid state emission (2 w% in KBr matrix) of complexes **1-5**.  $\lambda_{exc} = \lambda_{max}^{abs}$  of the lowest energy band in DCM solution Inset: picture of KBr pellets taken under UV irradiation.

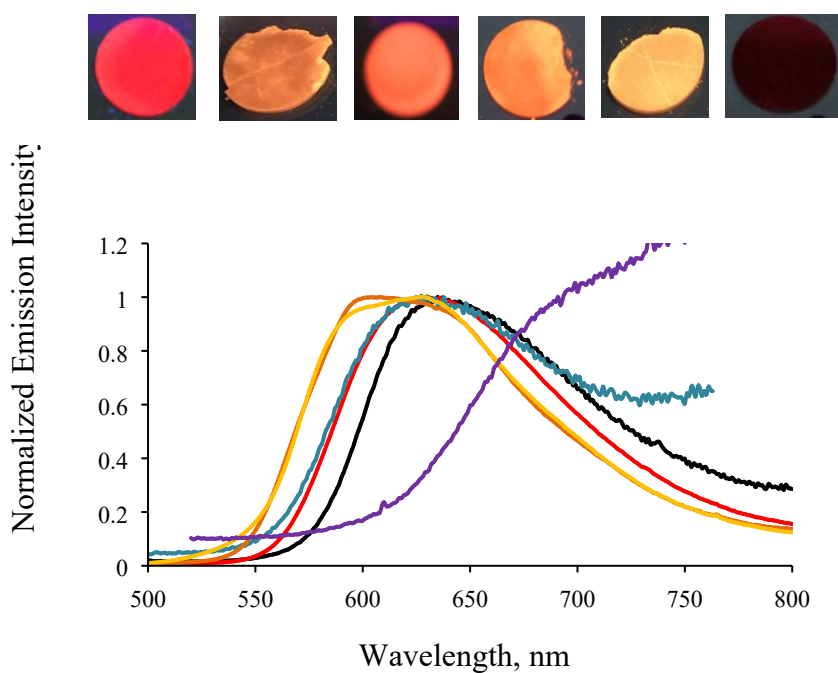

**Fig. S84:** Solid state emission (2 w% in KBr matrix) of complexes **6-11**.  $\lambda_{exc} = \lambda_{max}^{abs}$  of the lowest energy band in DCM solution Inset: picture of KBr pellets taken under UV irradiation

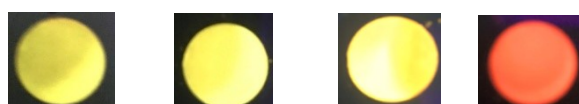

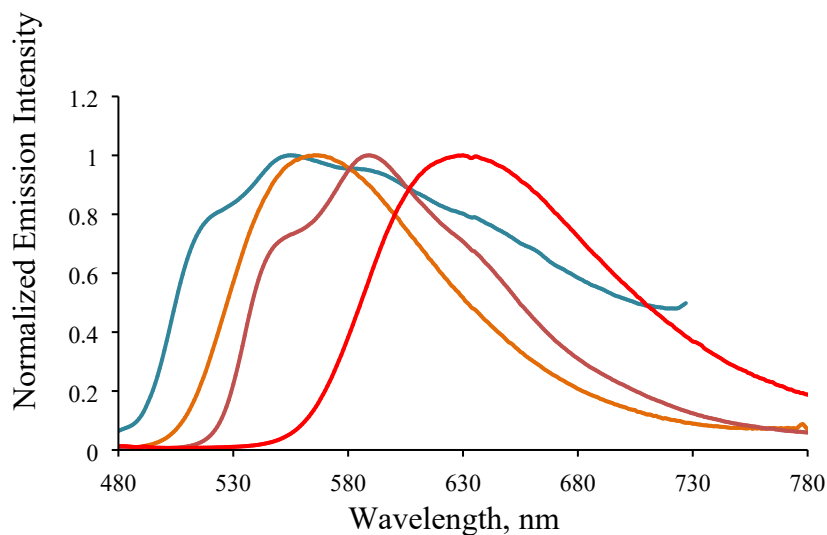

**Fig. S85:** Solid state emission (2 w% in KBr matrix) of complexes **2**, **7**, **13** and **15**.  $\lambda_{exc} = \lambda_{abs_{max}}^{abs}$  of the lowest energy band in DCM solution Inset: picture of KBr pellets taken under UV irradiation.

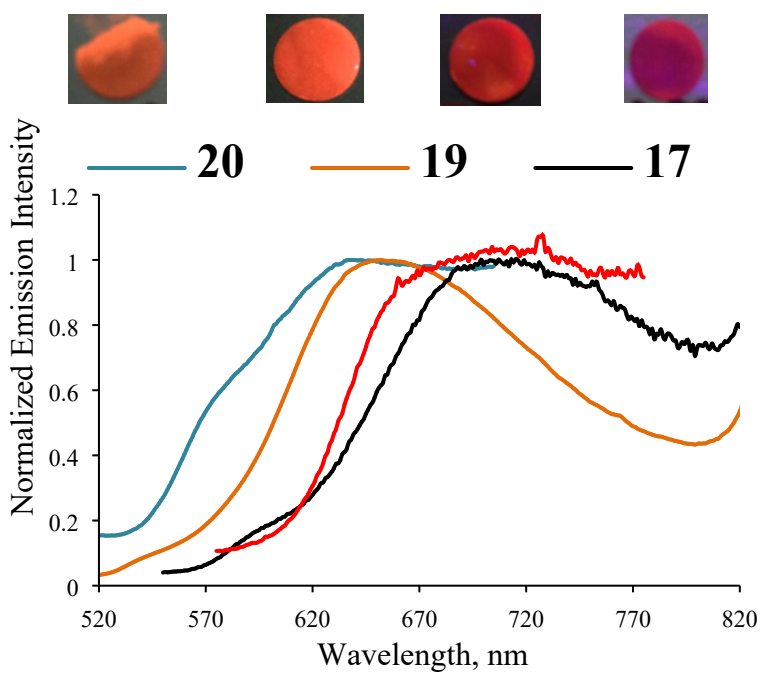

**Fig. S86:** Solid state emission (2 w% in KBr matrix) of complexes **17-20**.  $\lambda_{exc} = \lambda_{abs_{max}}^{abs}$  of the lowest energy band in DCM solution Inset: picture of KBr pellets taken under UV irradiation.

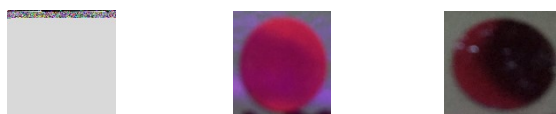

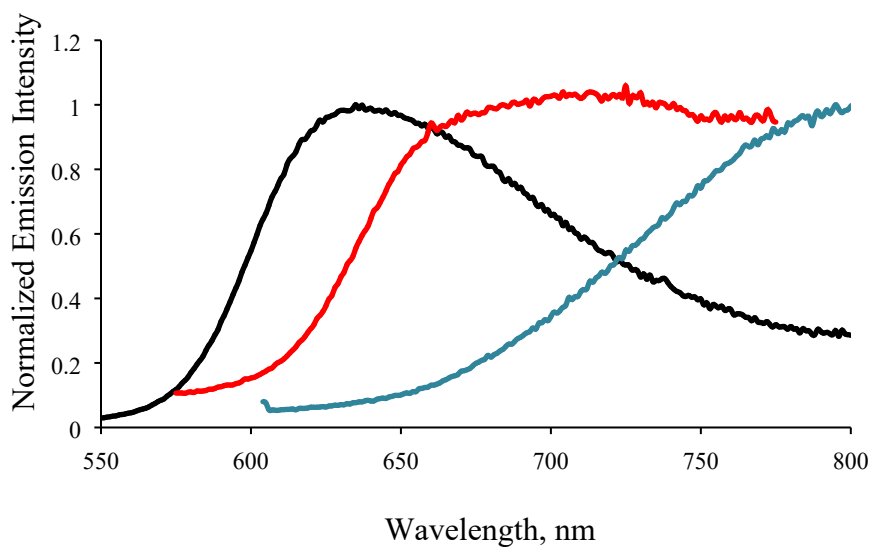

**Fig. S87:** Solid state emission (2 w% in KBr matrix) of complexes **6**, **18** and **23**.  $\lambda_{exc}$   
 $= \lambda_{max}^{abs}$  of the lowest energy band in DCM solution Inset: picture of KBr pellets taken under  
 UV irradiation.

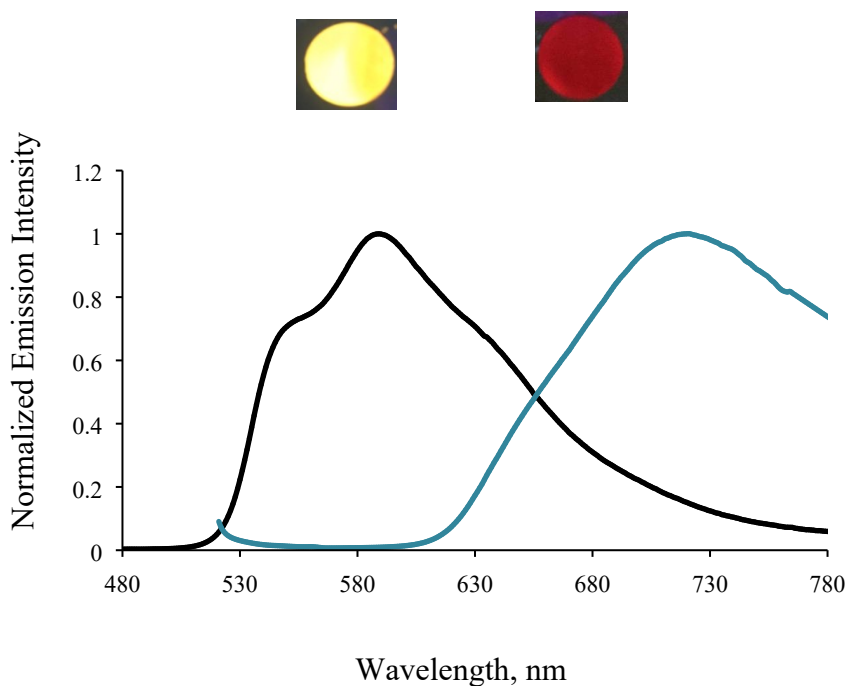

**Fig. S88:** Solid state emission (2 w% in KBr matrix) of complexes **2** and **23**.  $\lambda_{exc}$   
 $= \lambda_{max}^{abs}$  of the lowest energy band in DCM solution Inset: picture of KBr pellets taken under  
 UV irradiation.

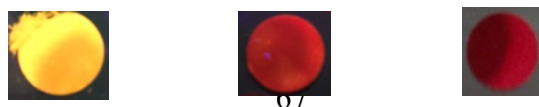

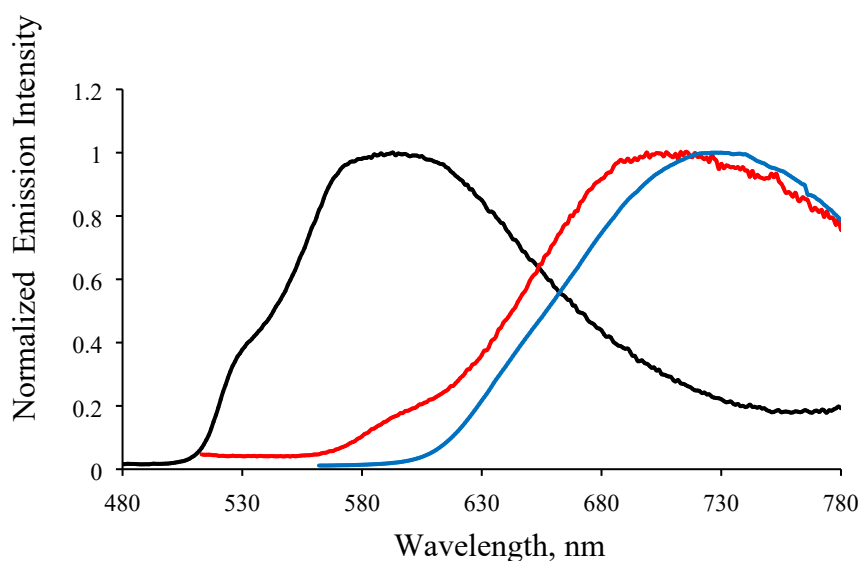

**Fig. S89:** Solid state emission (2 w% in KBr matrix) of complexes **1**, **17** and **21**.  $\lambda_{exc}$   
 $= \lambda_{max}^{abs}$  of the lowest energy band in DCM solution Inset: picture of KBr pellets taken under  
 UV irradiation

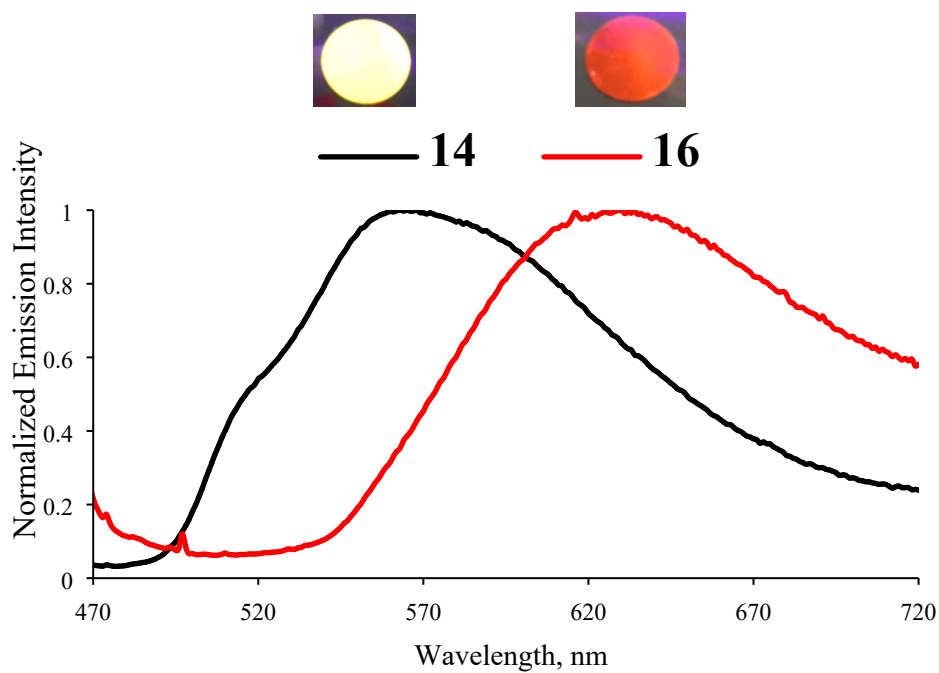

**Fig. S90:** Solid state emission (2 w% in KBr matrix) of complexes **14** and **16**.  $\lambda_{exc} = \lambda_{max}^{abs}$  of  
 the lowest energy band in DCM solution Inset: picture of KBr pellets taken under UV  
 irradiation.

## Additional Theoretical Results

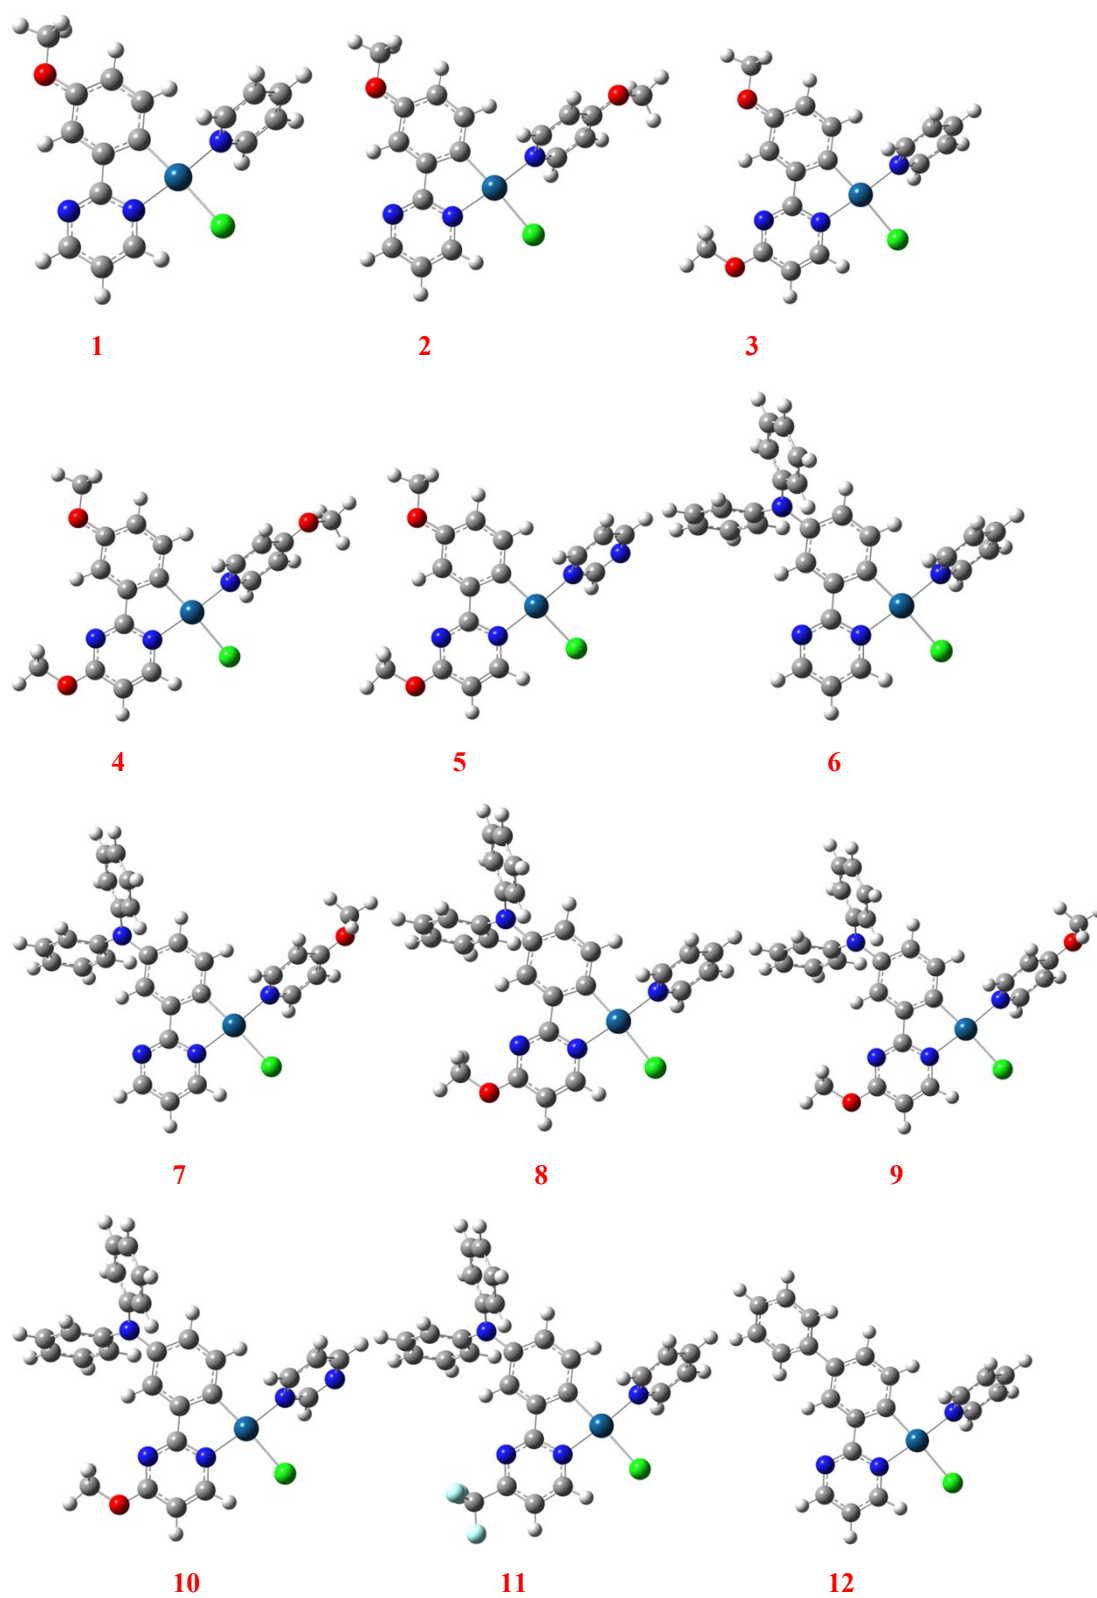

Fig. S91. DFT-optimized structures of complexes 1-12.

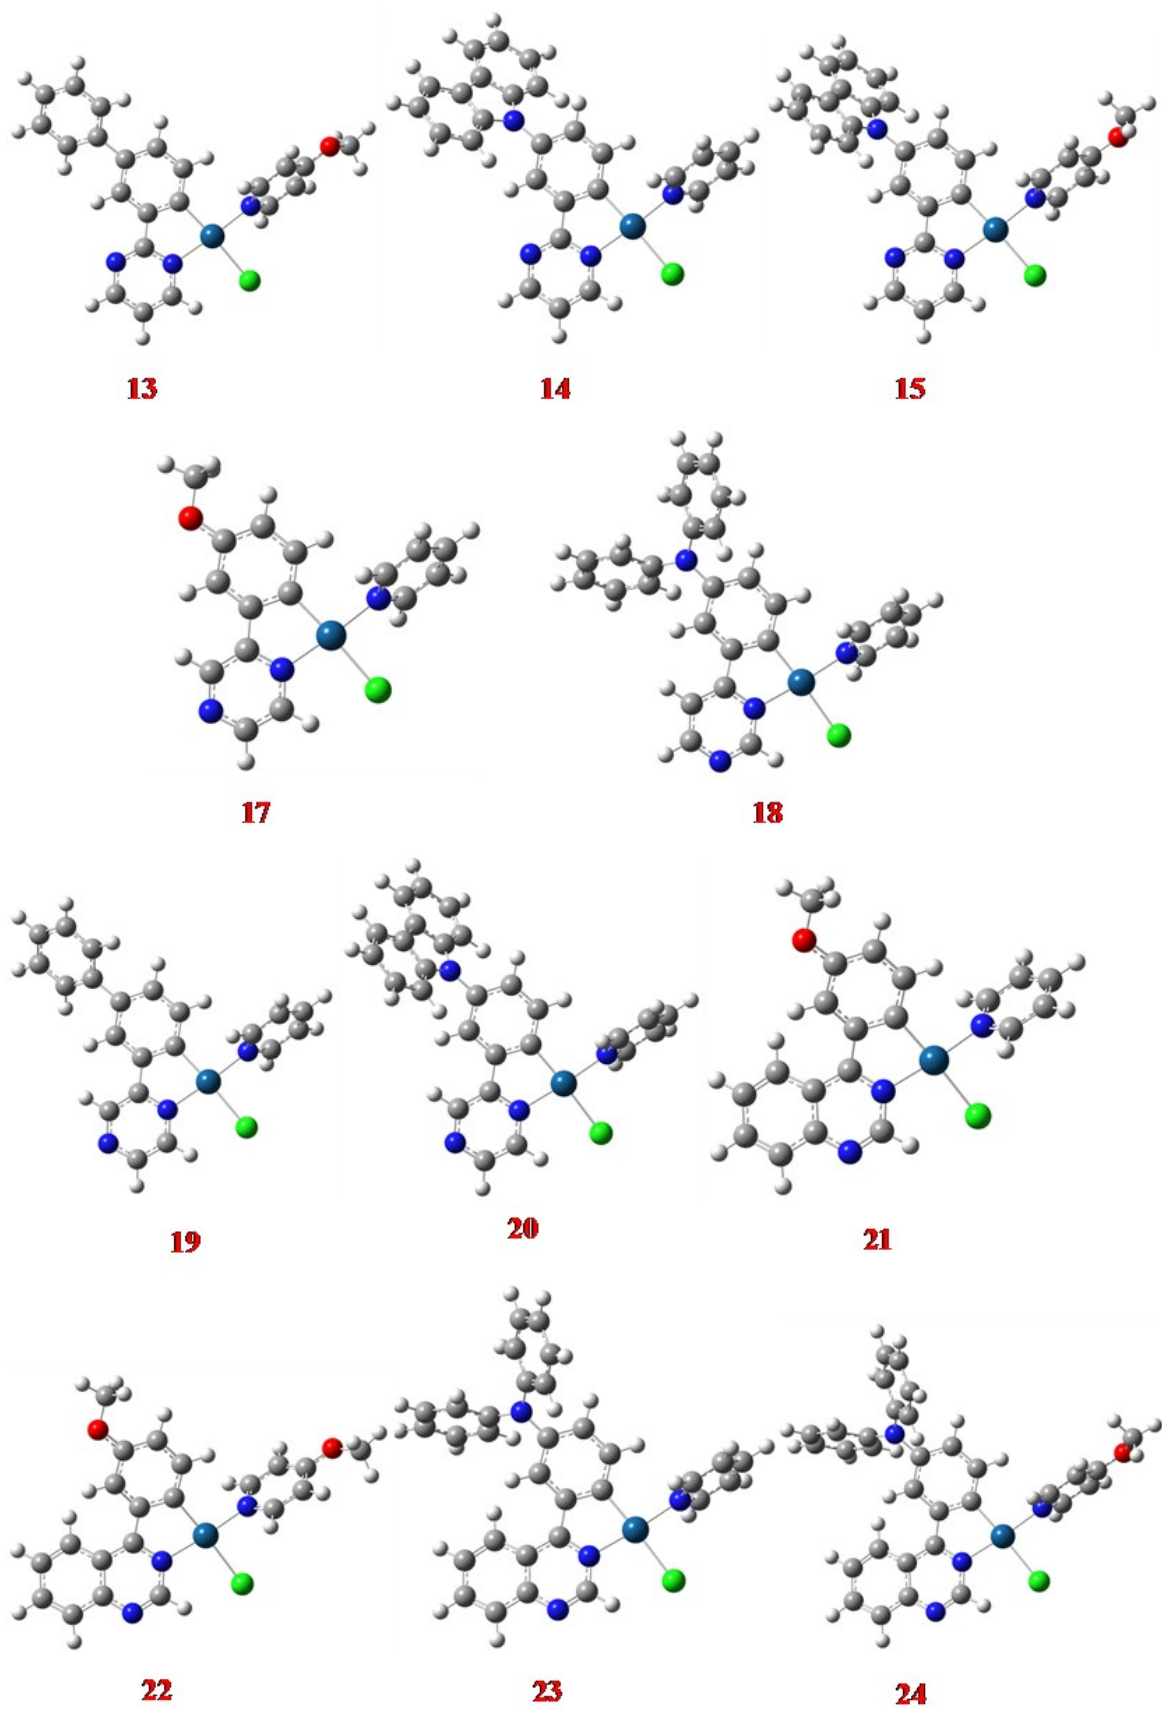

Fig. S92. DFT-optimized structures of complexes 13-15 and 17-24.

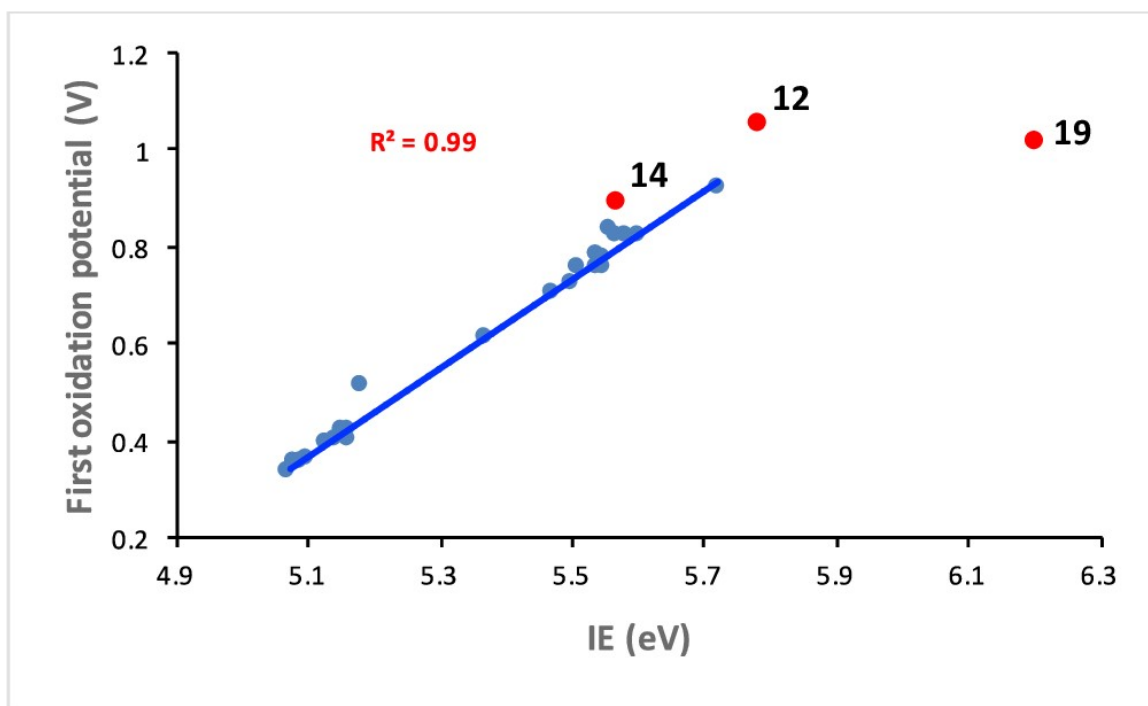

**Fig. S93.** The linear correlation between the first recorded oxidation peak and the computed ionization energies for a series of 23 complexes (see text). Complexes **12**, **14** and **19** (not included in the fit) are added for comparison.

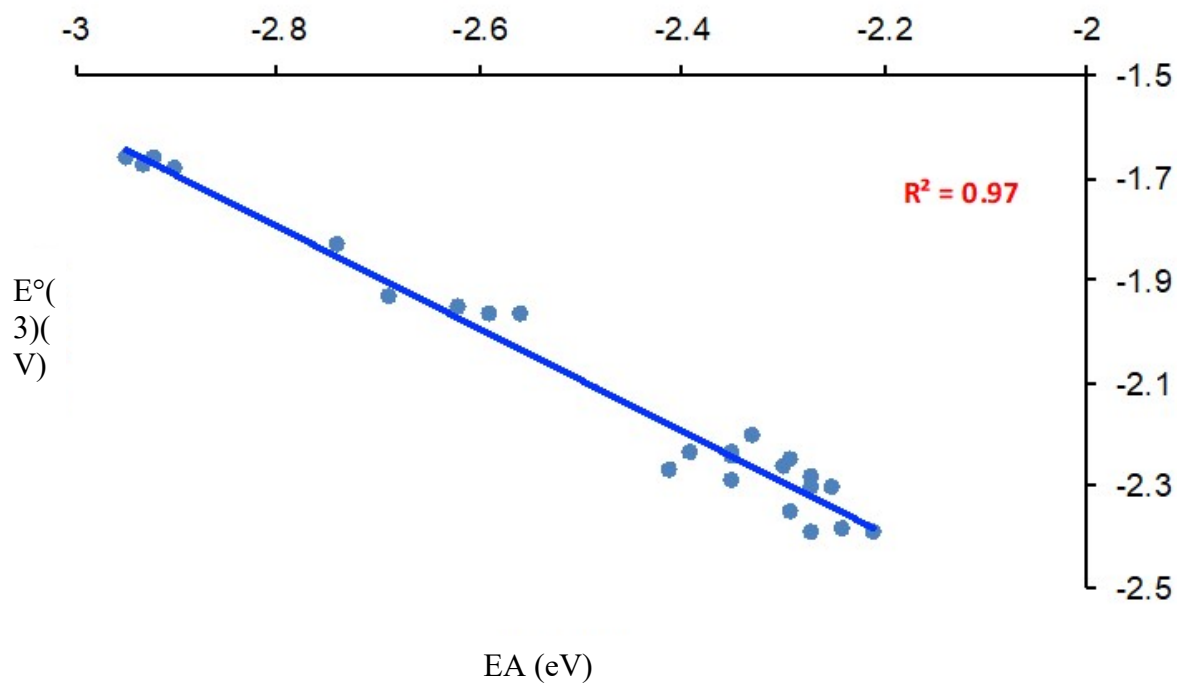

**Fig. S94.** The linear correlation between the recorded  $E^{\circ}(3)$  reduction potentials and the computed electron affinities for a series of 24 complexes.

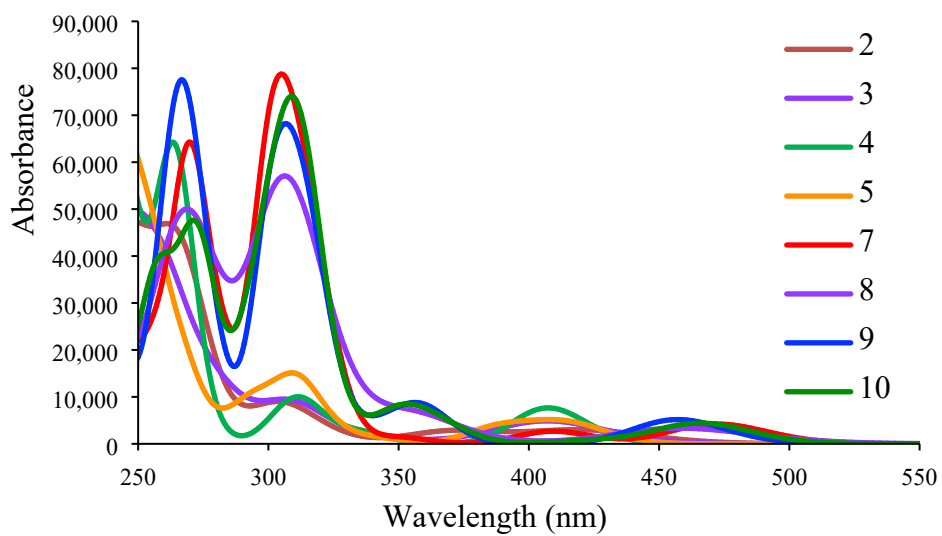

**Fig. S95.** TD-DFT-simulated UV-vis spectra of complexes **2-5, 7-10**.

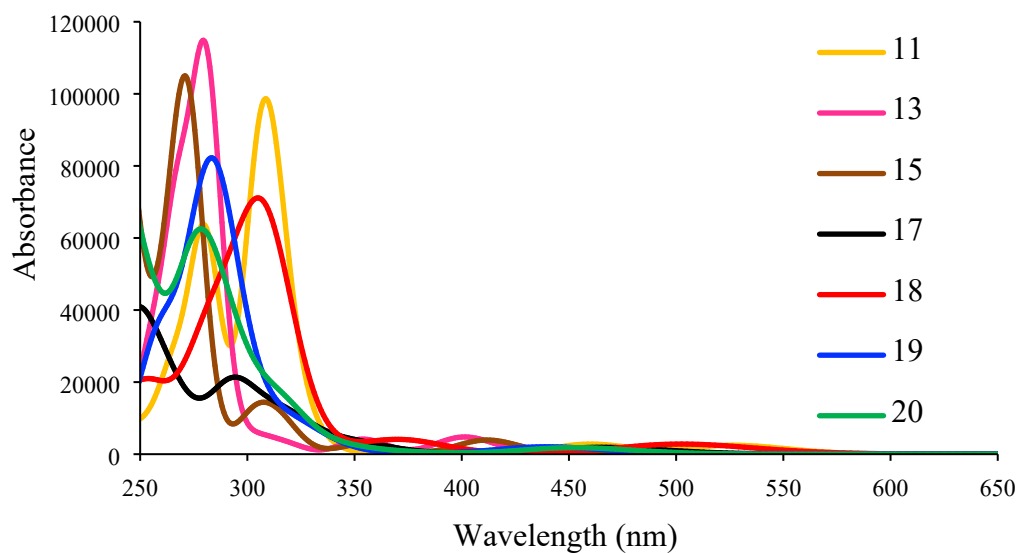

**Fig. S96.** TD-DFT-simulated UV-vis spectra of complexes **11, 13, 15, 17-20**.



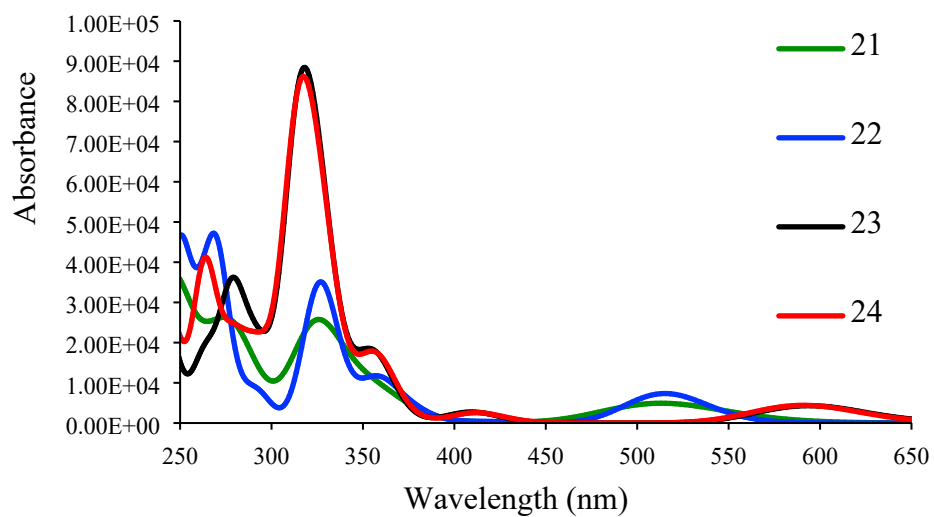

**Fig. S97.** TD-DFT-simulated UV-vis spectra of complexes **21-24**.

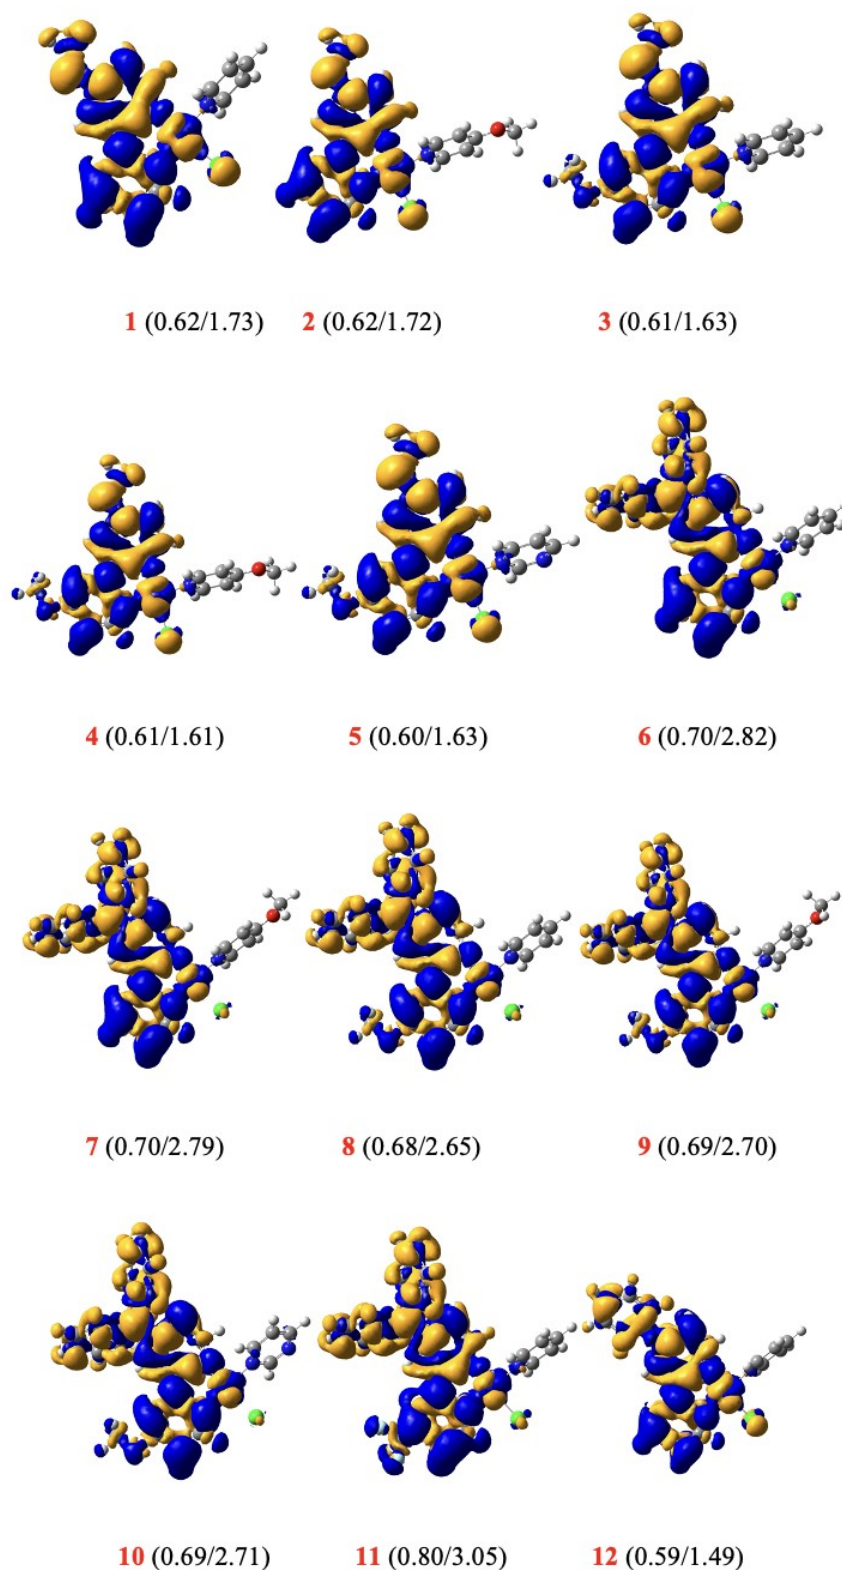

**Fig. S98.** Density difference plots associated with the triplet→singlet emissive transitions for complexes 1-12. The blue and yellow colors indicate an increase and decrease of density upon de-excitation, respectively. The numerical values are the computed charge transfers ( $q^{CT}$ ) and corresponding distance transfer ( $d^{CT}$ , in Å), respectively (see Computational details)

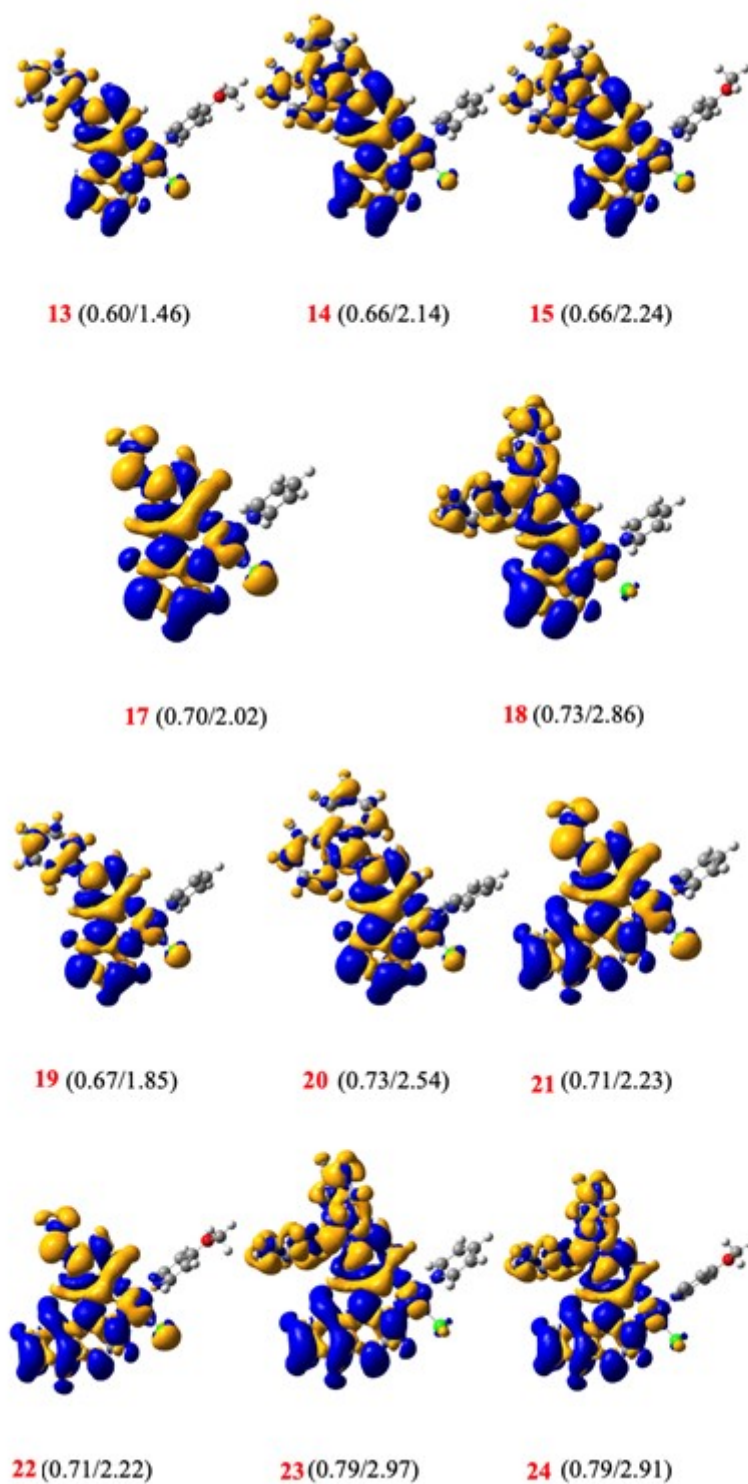

**Fig. S99.** Density difference plots associated with the triplet→singlet emissive transitions for complexes **13-15**, **17-24**. The blue and yellow colors indicate an increase and decrease of density upon de-excitation, respectively. The numerical values are the computed charge transfers ( $q^{\text{CT}}$ ) and corresponding distance transfer ( $d^{\text{CT}}$ , in Å), respectively (see Computational details).

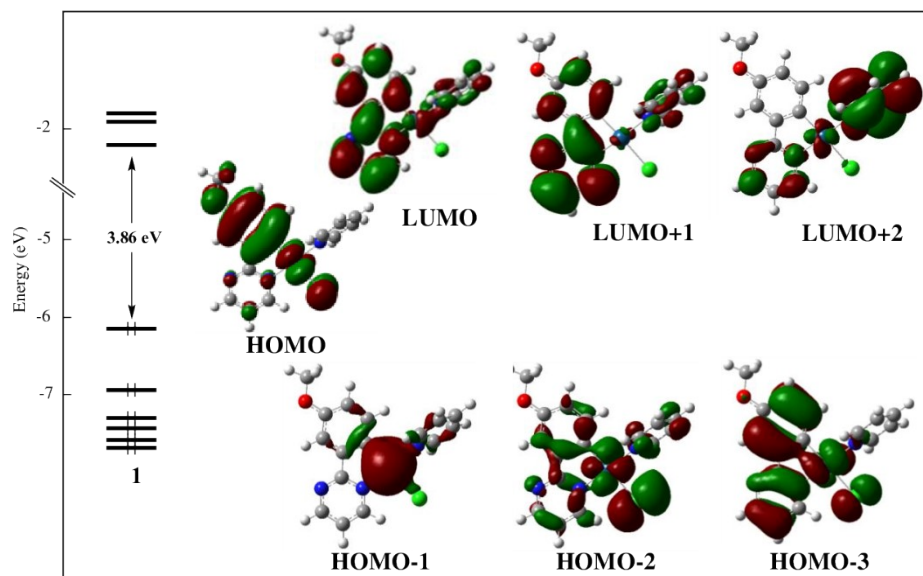

**Fig. S100.** Kohn-Sham MO diagrams of complex 1.

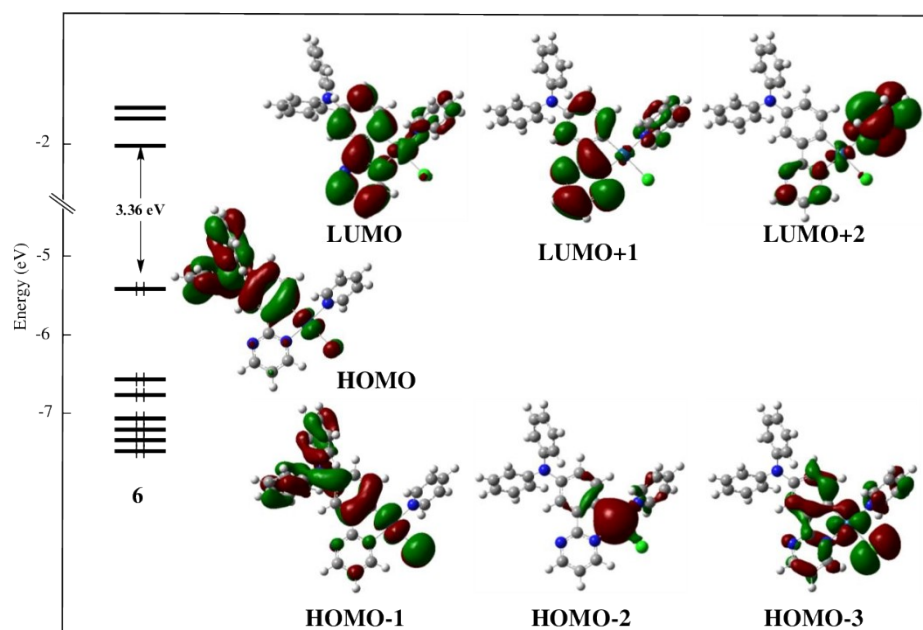

**Fig. S101.** Kohn-Sham MO diagrams of complex 6.

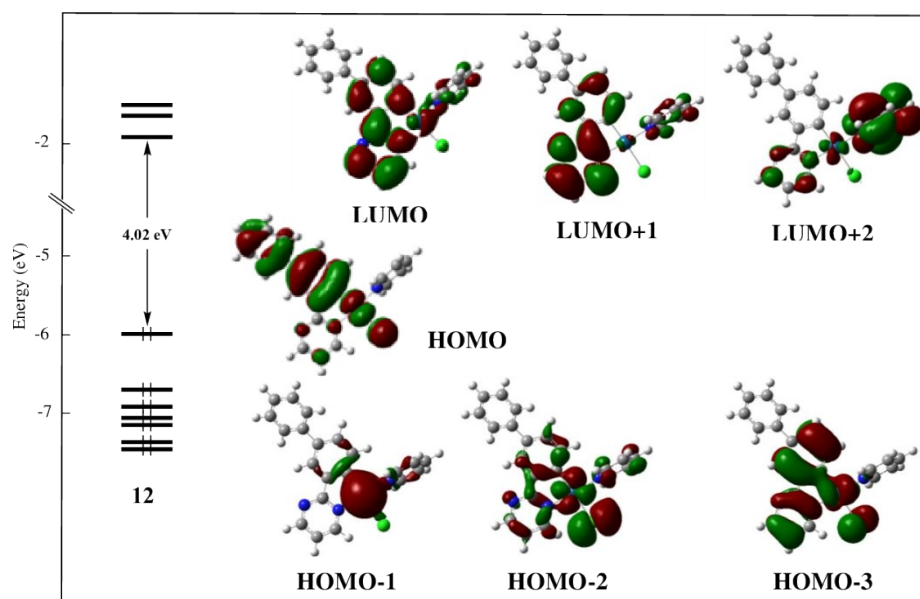

**Fig. S102.** Kohn-Sham MO diagrams of complex 12.

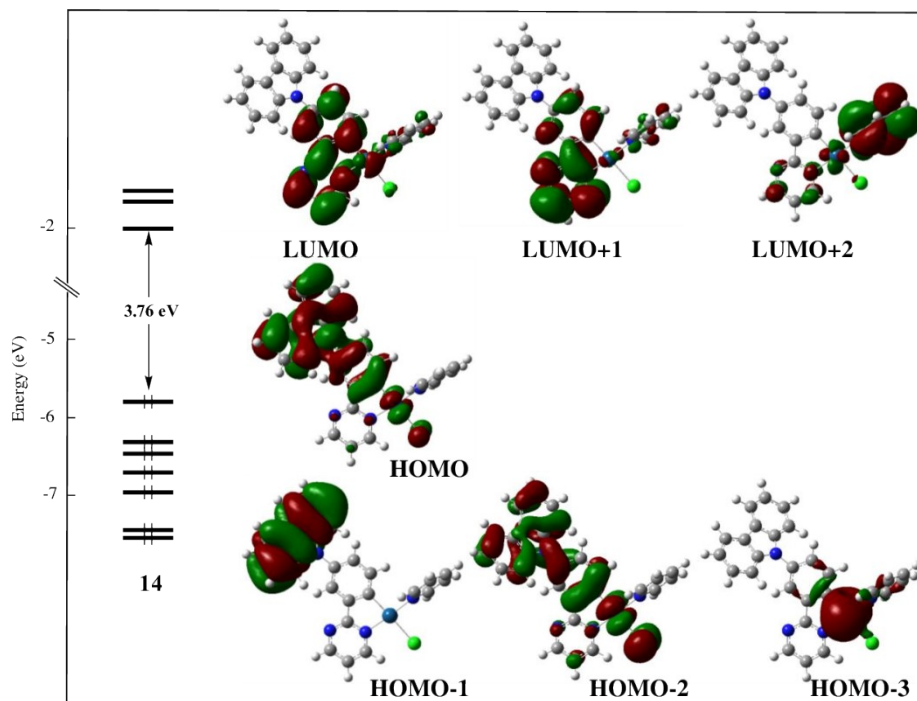

**Fig. S103.** Kohn-Sham MO diagrams of complex 14.

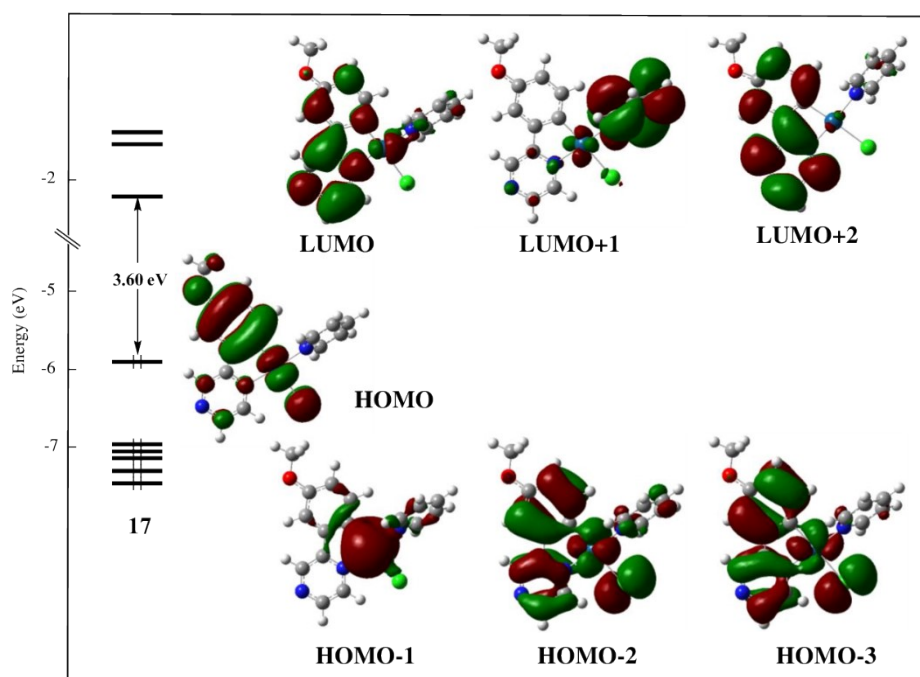

**Fig. S104.** Kohn-Sham MO diagrams of complex 17.

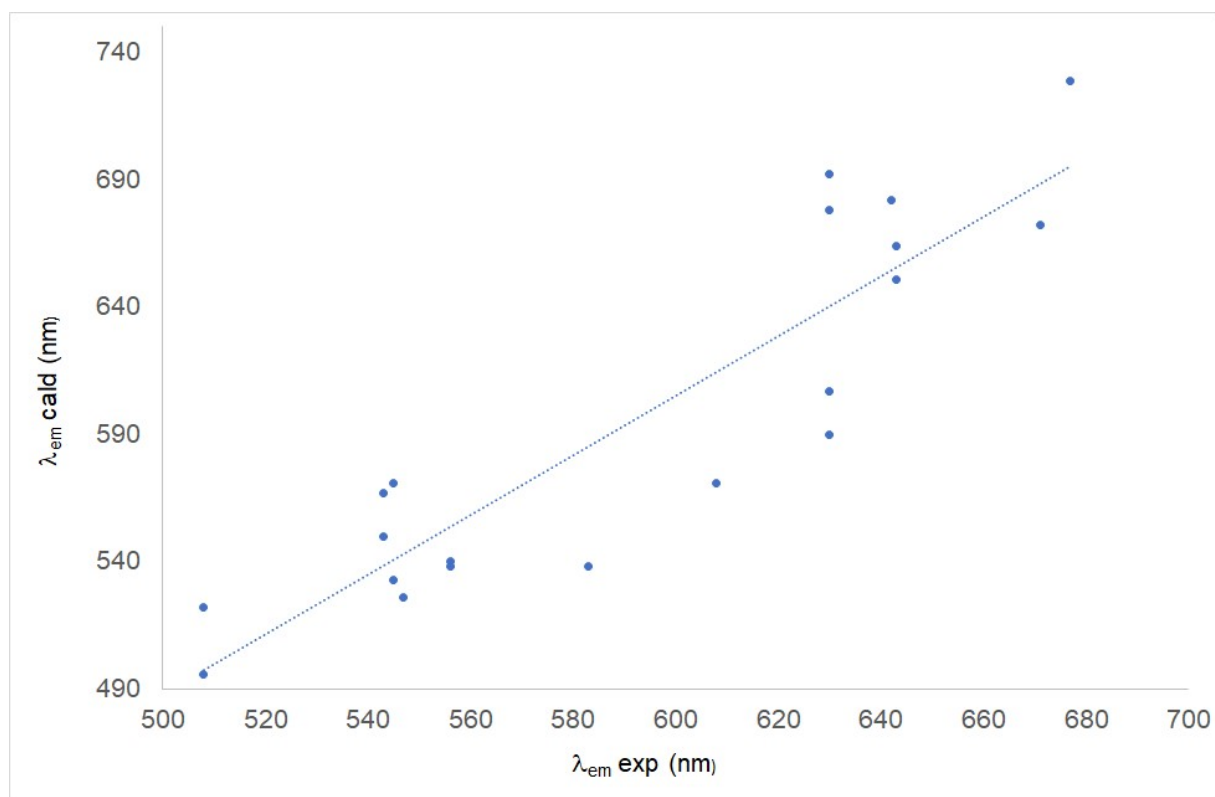

**Fig. S105.** Correlation between calculated and experimental phosphorescence maxima

## Cartesian coordinates (Å)

### Comp 1

|    |           |           |           |
|----|-----------|-----------|-----------|
| Pt | 2.627012  | 2.708132  | 8.889426  |
| Cl | 3.090737  | 3.623759  | 6.696124  |
| N  | 3.206907  | 4.353088  | 9.906602  |
| N  | 3.408012  | 5.275707  | 12.072158 |
| N  | 1.987734  | 1.020545  | 7.971415  |
| C  | 3.667141  | 5.482465  | 9.368746  |
| H  | 3.742013  | 5.494204  | 8.288034  |
| C  | 4.016356  | 6.554775  | 10.163612 |
| H  | 4.389732  | 7.471167  | 9.728724  |
| C  | 3.863302  | 6.397931  | 11.530412 |
| H  | 4.114999  | 7.200792  | 12.216798 |
| C  | 3.091992  | 4.280967  | 11.257775 |
| C  | 2.597701  | 3.004373  | 11.742933 |
| C  | 2.441733  | 2.740253  | 13.096363 |
| H  | 2.673262  | 3.498813  | 13.834869 |
| C  | 1.991142  | 1.490938  | 13.501453 |
| C  | 1.711913  | 0.525079  | 12.536159 |
| H  | 1.368975  | -0.459982 | 12.826556 |
| C  | 1.873233  | 0.811330  | 11.182422 |
| H  | 1.649243  | 0.022313  | 10.473305 |
| C  | 2.311459  | 2.055555  | 10.740508 |
| C  | 0.697020  | 0.665010  | 8.014928  |
| H  | 0.046207  | 1.302229  | 8.597853  |
| C  | 0.219373  | -0.450711 | 7.356401  |
| H  | -0.833492 | -0.692407 | 7.418720  |
| C  | 1.102035  | -1.235297 | 6.632363  |
| H  | 0.755908  | -2.118719 | 6.109631  |
| C  | 2.435970  | -0.865078 | 6.589091  |
| H  | 3.165793  | -1.441621 | 6.036102  |
| C  | 2.841273  | 0.270216  | 7.262766  |
| H  | 3.868380  | 0.606658  | 7.244186  |
| O  | 1.860159  | 1.301007  | 14.837514 |
| C  | 1.413464  | 0.039182  | 15.283395 |
| H  | 1.378258  | 0.095804  | 16.369764 |
| H  | 0.412929  | -0.189766 | 14.902476 |
| H  | 2.102765  | -0.757998 | 14.986864 |

### Comp 2

|    |          |           |           |
|----|----------|-----------|-----------|
| Pt | 2.527762 | 2.879886  | 8.865886  |
| Cl | 2.950319 | 3.911367  | 6.715035  |
| N  | 3.223768 | 4.431246  | 9.952526  |
| N  | 3.558805 | 5.206725  | 12.159357 |
| N  | 1.772585 | 1.279496  | 7.876848  |
| C  | 3.710694 | 5.572153  | 9.464872  |
| H  | 3.739693 | 5.648768  | 8.384625  |
| C  | 4.141396 | 6.576736  | 10.306966 |
| H  | 4.536256 | 7.502242  | 9.912131  |
| C  | 4.040348 | 6.340747  | 11.667144 |
| H  | 4.357106 | 7.087405  | 12.389123 |
| C  | 3.163745 | 4.279489  | 11.300880 |
| C  | 2.634254 | 2.996785  | 11.729441 |
| C  | 2.524951 | 2.654947  | 13.070128 |
| H  | 2.820717 | 3.355814  | 13.842015 |
| C  | 2.037591 | 1.402447  | 13.418488 |
| C  | 1.676175 | 0.510987  | 12.409787 |
| H  | 1.303344 | -0.475473 | 12.655114 |
| C  | 1.791966 | 0.874583  | 11.070084 |

|   |           |           |           |
|---|-----------|-----------|-----------|
| H | 1.504474  | 0.141544  | 10.324758 |
| C | 2.263777  | 2.125549  | 10.684743 |
| C | 0.473004  | 0.951723  | 7.972756  |
| H | -0.124797 | 1.559929  | 8.637773  |
| C | -0.083192 | -0.090798 | 7.276446  |
| H | -1.135842 | -0.318868 | 7.378577  |
| C | 0.724192  | -0.856999 | 6.432939  |
| C | 2.072206  | -0.518226 | 6.332427  |
| H | 2.758928  | -1.060548 | 5.698867  |
| C | 2.543584  | 0.553135  | 7.061529  |
| H | 3.580161  | 0.852938  | 6.992820  |
| O | 1.954363  | 1.134744  | 14.745320 |
| C | 1.468098  | -0.131584 | 15.132926 |
| H | 1.479255  | -0.141250 | 16.221263 |
| H | 0.443513  | -0.292312 | 14.782210 |
| H | 2.107139  | -0.938310 | 14.759522 |
| O | 0.139047  | -1.859935 | 5.783238  |
| C | 0.932044  | -2.656077 | 4.913692  |
| H | 1.732577  | -3.156222 | 5.464065  |
| H | 0.258627  | -3.399619 | 4.495005  |
| H | 1.355431  | -2.051063 | 4.108427  |

Comp 3

|    |           |           |           |
|----|-----------|-----------|-----------|
| Pt | 2.629485  | 2.689498  | 8.894367  |
| Cl | 3.104048  | 3.624676  | 6.713196  |
| N  | 3.205284  | 4.329295  | 9.926034  |
| N  | 3.385577  | 5.245275  | 12.092830 |
| N  | 1.988707  | 1.009009  | 7.963821  |
| C  | 3.671225  | 5.473973  | 9.402021  |
| H  | 3.757157  | 5.494903  | 8.322692  |
| C  | 4.009111  | 6.538486  | 10.190951 |
| H  | 4.384288  | 7.462102  | 9.774481  |
| C  | 3.839739  | 6.369652  | 11.570699 |
| C  | 3.080658  | 4.253943  | 11.267981 |
| C  | 2.587087  | 2.974929  | 11.749379 |
| C  | 2.424692  | 2.706436  | 13.101018 |
| H  | 2.648853  | 3.463514  | 13.843461 |
| C  | 1.976361  | 1.454417  | 13.500491 |
| C  | 1.707230  | 0.490168  | 12.530970 |
| H  | 1.367130  | -0.497275 | 12.816635 |
| C  | 1.874965  | 0.780996  | 11.178813 |
| H  | 1.658572  | -0.007358 | 10.466519 |
| C  | 2.309652  | 2.028282  | 10.741670 |
| C  | 0.701816  | 0.641875  | 8.022389  |
| H  | 0.055217  | 1.265810  | 8.624065  |
| C  | 0.222748  | -0.468801 | 7.356255  |
| H  | -0.827092 | -0.719910 | 7.431672  |
| C  | 1.099950  | -1.236263 | 6.607532  |
| H  | 0.752766  | -2.115280 | 6.078163  |
| C  | 2.429900  | -0.854148 | 6.548397  |
| H  | 3.155673  | -1.416814 | 5.976039  |
| C  | 2.836568  | 0.275252  | 7.231305  |
| H  | 3.860506  | 0.620224  | 7.200635  |
| O  | 1.837408  | 1.260662  | 14.835616 |
| C  | 1.388777  | -0.002768 | 15.274787 |
| H  | 1.344982  | 0.050953  | 16.361017 |
| H  | 0.391493  | -0.231736 | 14.885425 |
| H  | 2.081128  | -0.798571 | 14.981648 |
| O  | 4.152358  | 7.385134  | 12.358275 |
| C  | 3.977958  | 7.218745  | 13.765019 |
| H  | 2.933056  | 7.016841  | 14.001969 |
| H  | 4.597106  | 6.401525  | 14.135770 |



|   |          |          |           |
|---|----------|----------|-----------|
| H | 4.290994 | 8.161642 | 14.206290 |
|---|----------|----------|-----------|

Comp 4

|    |           |           |           |
|----|-----------|-----------|-----------|
| Pt | 2.659048  | 2.721488  | 8.895933  |
| Cl | 3.148447  | 3.675327  | 6.722615  |
| N  | 3.209648  | 4.362803  | 9.939869  |
| N  | 3.372473  | 5.265614  | 12.114016 |
| N  | 2.049979  | 1.031055  | 7.956926  |
| C  | 3.671679  | 5.513831  | 9.426454  |
| H  | 3.764171  | 5.542167  | 8.347772  |
| C  | 3.998949  | 6.575052  | 10.224386 |
| H  | 4.371288  | 7.503607  | 9.816427  |
| C  | 3.823617  | 6.395678  | 11.601983 |
| C  | 3.077780  | 4.278029  | 11.280591 |
| C  | 2.589313  | 2.993003  | 11.750826 |
| C  | 2.416220  | 2.716828  | 13.099673 |
| H  | 2.627792  | 3.472130  | 13.847564 |
| C  | 1.973050  | 1.459956  | 13.489001 |
| C  | 1.720196  | 0.498380  | 12.512419 |
| H  | 1.383911  | -0.492662 | 12.790176 |
| C  | 1.898749  | 0.796723  | 11.163338 |
| H  | 1.694705  | 0.010689  | 10.444926 |
| C  | 2.328206  | 2.049388  | 10.735638 |
| C  | 0.766029  | 0.636734  | 8.000293  |
| H  | 0.099314  | 1.248665  | 8.592405  |
| C  | 0.307172  | -0.474672 | 7.340421  |
| H  | -0.736087 | -0.755340 | 7.398733  |
| C  | 1.201671  | -1.242709 | 6.591938  |
| C  | 2.532874  | -0.833740 | 6.543206  |
| H  | 3.283069  | -1.371563 | 5.981884  |
| C  | 2.903590  | 0.303252  | 7.230245  |
| H  | 3.925022  | 0.656873  | 7.200217  |
| O  | 1.822358  | 1.259015  | 14.822077 |
| C  | 1.375206  | -0.008355 | 15.250781 |
| H  | 1.318369  | 0.040624  | 16.336654 |
| H  | 0.383745  | -0.240971 | 14.848861 |
| H  | 2.075011  | -0.799524 | 14.962734 |
| O  | 4.127618  | 7.407345  | 12.398302 |
| C  | 3.949994  | 7.228997  | 13.803024 |
| H  | 2.905751  | 7.018401  | 14.035388 |
| H  | 4.573213  | 6.412809  | 14.169378 |
| H  | 4.255728  | 8.170398  | 14.252599 |
| O  | 0.709379  | -2.315136 | 5.976444  |
| C  | 1.593446  | -3.117436 | 5.206257  |
| H  | 2.386674  | -3.534539 | 5.831438  |
| H  | 0.986850  | -3.923813 | 4.801908  |
| H  | 2.029622  | -2.541346 | 4.386755  |

Comp 5

|    |          |          |           |
|----|----------|----------|-----------|
| Pt | 2.616211 | 2.680915 | 8.903527  |
| Cl | 3.087015 | 3.601832 | 6.717647  |
| N  | 3.203098 | 4.317467 | 9.929547  |
| N  | 3.387557 | 5.241264 | 12.092180 |
| N  | 1.956571 | 1.010445 | 7.971523  |
| C  | 3.677381 | 5.456656 | 9.400362  |
| H  | 3.764498 | 5.472648 | 8.321153  |
| C  | 4.021676 | 6.521947 | 10.184991 |
| H  | 4.403673 | 7.441025 | 9.764763  |
| C  | 3.849779 | 6.360494 | 11.565482 |
| C  | 3.077062 | 4.248619 | 11.271771 |
| C  | 2.577236 | 2.973868 | 11.757973 |

|   |           |           |           |
|---|-----------|-----------|-----------|
| C | 2.414908  | 2.710272  | 13.110186 |
| H | 2.640960  | 3.469409  | 13.849894 |
| C | 1.965474  | 1.459776  | 13.514258 |
| C | 1.696924  | 0.492022  | 12.548380 |
| H | 1.358454  | -0.494928 | 12.837360 |
| C | 1.864832  | 0.778353  | 11.195095 |
| H | 1.652711  | -0.015863 | 10.487898 |
| C | 2.297861  | 2.024280  | 10.753901 |
| C | 0.681379  | 0.613155  | 8.055128  |
| H | 0.032805  | 1.198123  | 8.693294  |
| C | 0.234890  | -0.488120 | 7.356354  |
| H | -0.797179 | -0.803983 | 7.420120  |
| C | 1.161917  | -1.162831 | 6.582542  |
| H | 0.883527  | -2.043278 | 6.012412  |
| C | 2.776151  | 0.299124  | 7.184183  |
| H | 3.798165  | 0.649245  | 7.119191  |
| O | 1.826673  | 1.271104  | 14.849481 |
| C | 1.379257  | 0.008791  | 15.293861 |
| H | 1.335430  | 0.067068  | 16.379803 |
| H | 0.382244  | -0.222549 | 14.905334 |
| H | 2.072601  | -0.787261 | 15.003947 |
| O | 4.168084  | 7.376927  | 12.348498 |
| C | 3.992479  | 7.217883  | 13.756229 |
| H | 2.946323  | 7.023383  | 13.993657 |
| H | 4.606733  | 6.398576  | 14.130390 |
| H | 4.311248  | 8.160859  | 14.193097 |
| N | 2.430852  | -0.770610 | 6.498844  |

Comp 6

|    |           |           |           |
|----|-----------|-----------|-----------|
| Pt | -2.512757 | -0.234549 | -0.038708 |
| Cl | -4.857010 | -0.812623 | -0.196700 |
| N  | -1.834174 | -2.071925 | -0.530918 |
| N  | 0.127905  | -3.326047 | -0.930256 |
| N  | -3.077218 | 1.652918  | 0.424898  |
| C  | -2.586717 | -3.136070 | -0.809482 |
| H  | -3.657768 | -2.986889 | -0.744598 |
| C  | -2.009803 | -4.339419 | -1.159926 |
| H  | -2.618791 | -5.203251 | -1.386195 |
| C  | -0.626927 | -4.380944 | -1.208714 |
| H  | -0.104447 | -5.293093 | -1.480804 |
| C  | -0.483810 | -2.200141 | -0.597487 |
| C  | 0.243110  | -0.989791 | -0.259717 |
| C  | 1.632735  | -0.935405 | -0.264854 |
| H  | 2.200702  | -1.814478 | -0.545751 |
| C  | 2.275924  | 0.238947  | 0.099219  |
| C  | 1.496108  | 1.339764  | 0.463450  |
| H  | 1.989853  | 2.256890  | 0.765984  |
| C  | 0.111017  | 1.281398  | 0.441042  |
| H  | -0.439967 | 2.166900  | 0.736778  |
| C  | -0.562975 | 0.115511  | 0.073421  |
| C  | -2.848536 | 2.661535  | -0.426239 |
| H  | -2.316123 | 2.409159  | -1.332998 |
| C  | -3.264743 | 3.951983  | -0.165360 |
| H  | -3.059464 | 4.731102  | -0.887579 |
| C  | -3.934631 | 4.217923  | 1.017593  |
| H  | -4.268959 | 5.221694  | 1.250167  |
| C  | -4.169751 | 3.172883  | 1.895622  |
| H  | -4.690436 | 3.326051  | 2.831698  |
| C  | -3.734191 | 1.905035  | 1.564441  |
| H  | -3.908346 | 1.057250  | 2.212106  |
| N  | 3.685660  | 0.324413  | 0.109932  |
| C  | 4.445904  | -0.729644 | 0.648468  |

|   |          |           |           |
|---|----------|-----------|-----------|
| C | 4.013817 | -1.402054 | 1.793279  |
| H | 3.089807 | -1.100503 | 2.272088  |
| C | 4.756779 | -2.448783 | 2.314601  |
| H | 4.404010 | -2.956993 | 3.205198  |
| C | 5.948341 | -2.837681 | 1.717115  |
| H | 6.529519 | -3.653503 | 2.130342  |
| C | 6.383664 | -2.167774 | 0.581443  |
| H | 7.306908 | -2.464114 | 0.095904  |
| C | 5.639744 | -1.129546 | 0.044873  |
| H | 5.982092 | -0.622410 | -0.849220 |
| C | 4.315550 | 1.451531  | -0.448234 |
| C | 5.455466 | 1.998545  | 0.144673  |
| H | 5.858084 | 1.547349  | 1.043694  |
| C | 6.069150 | 3.110122  | -0.408999 |
| H | 6.952201 | 3.520508  | 0.068230  |
| C | 5.554118 | 3.708044  | -1.551869 |
| H | 6.033519 | 4.581119  | -1.978491 |
| C | 4.416266 | 3.171865  | -2.139373 |
| H | 4.004172 | 3.621345  | -3.036081 |
| C | 3.804317 | 2.051420  | -1.600667 |
| H | 2.922876 | 1.634224  | -2.072870 |

Comp 7

|    |           |           |           |
|----|-----------|-----------|-----------|
| Pt | -2.166059 | -0.932125 | -0.095759 |
| Cl | -4.372605 | -1.912908 | -0.269725 |
| N  | -1.171599 | -2.641920 | -0.497321 |
| N  | 0.985664  | -3.552554 | -0.814731 |
| N  | -3.060707 | 0.843871  | 0.294594  |
| C  | -1.722360 | -3.833127 | -0.729610 |
| H  | -2.804077 | -3.869996 | -0.682347 |
| C  | -0.938974 | -4.932725 | -1.014388 |
| H  | -1.384558 | -5.899276 | -1.202949 |
| C  | 0.430694  | -4.734697 | -1.048702 |
| H  | 1.108448  | -5.553353 | -1.271163 |
| C  | 0.181708  | -2.536372 | -0.542973 |
| C  | 0.681276  | -1.204253 | -0.254048 |
| C  | 2.040189  | -0.908642 | -0.246365 |
| H  | 2.758189  | -1.686173 | -0.479461 |
| C  | 2.462388  | 0.374296  | 0.070612  |
| C  | 1.497107  | 1.337977  | 0.373446  |
| H  | 1.819133  | 2.339445  | 0.637969  |
| C  | 0.143818  | 1.038054  | 0.339619  |
| H  | -0.558856 | 1.825062  | 0.588486  |
| C  | -0.310668 | -0.242912 | 0.020328  |
| C  | -3.008584 | 1.856915  | -0.575455 |
| H  | -2.427094 | 1.687829  | -1.471831 |
| C  | -3.646831 | 3.062163  | -0.370794 |
| H  | -3.560387 | 3.832749  | -1.122959 |
| C  | -4.379948 | 3.241638  | 0.801003  |
| C  | -4.434281 | 2.182197  | 1.709170  |
| H  | -4.995839 | 2.281238  | 2.628591  |
| C  | -3.776351 | 1.014575  | 1.419177  |
| H  | -3.811573 | 0.171104  | 2.094546  |
| N  | 3.836721  | 0.701864  | 0.097385  |
| C  | 4.747903  | -0.169405 | 0.721401  |
| C  | 4.398701  | -0.833980 | 1.898662  |
| H  | 3.421409  | -0.666815 | 2.335616  |
| C  | 5.290997  | -1.703189 | 2.505035  |
| H  | 5.000231  | -2.208309 | 3.419474  |
| C  | 6.550380  | -1.918083 | 1.961284  |
| H  | 7.247742  | -2.594816 | 2.440671  |
| C  | 6.902881  | -1.255061 | 0.793226  |

|   |           |           |           |
|---|-----------|-----------|-----------|
| H | 7.878575  | -1.418131 | 0.348933  |
| C | 6.011687  | -0.395142 | 0.172294  |
| H | 6.292294  | 0.106707  | -0.745968 |
| C | 4.278625  | 1.886037  | -0.518524 |
| C | 5.298557  | 2.650756  | 0.052191  |
| H | 5.754450  | 2.325339  | 0.979594  |
| C | 5.726147  | 3.817909  | -0.558973 |
| H | 6.518071  | 4.397779  | -0.097893 |
| C | 5.139680  | 4.255898  | -1.739307 |
| H | 5.473125  | 5.172466  | -2.211341 |
| C | 4.119751  | 3.502886  | -2.305102 |
| H | 3.654638  | 3.825574  | -3.230054 |
| C | 3.695260  | 2.326570  | -1.708292 |
| H | 2.905635  | 1.740838  | -2.163671 |
| O | -5.038604 | 4.350717  | 1.126363  |
| C | -5.009812 | 5.445115  | 0.220832  |
| H | -5.449144 | 5.168014  | -0.740435 |
| H | -5.606919 | 6.227796  | 0.681786  |
| H | -3.987969 | 5.803175  | 0.074036  |

Comp 8

|    |           |           |           |
|----|-----------|-----------|-----------|
| Pt | 2.554710  | 0.041914  | 0.018536  |
| Cl | 4.875367  | 0.722518  | -0.103054 |
| N  | 1.803332  | 1.887843  | -0.326039 |
| N  | -0.202480 | 3.098812  | -0.603382 |
| N  | 3.188760  | -1.853656 | 0.342593  |
| C  | 2.510954  | 3.011724  | -0.520920 |
| H  | 3.587353  | 2.902129  | -0.475905 |
| C  | 1.899493  | 4.210832  | -0.761709 |
| H  | 2.463715  | 5.118701  | -0.918739 |
| C  | 0.499407  | 4.200421  | -0.796013 |
| C  | 0.457087  | 1.972926  | -0.372375 |
| C  | -0.227283 | 0.714472  | -0.133942 |
| C  | -1.613706 | 0.611789  | -0.138393 |
| H  | -2.214846 | 1.490414  | -0.341111 |
| C  | -2.213616 | -0.610609 | 0.127815  |
| C  | -1.394400 | -1.710987 | 0.391476  |
| H  | -1.854465 | -2.667521 | 0.615033  |
| C  | -0.012008 | -1.602145 | 0.369765  |
| H  | 0.571415  | -2.490041 | 0.585384  |
| C  | 0.619615  | -0.385921 | 0.103132  |
| C  | 3.014648  | -2.801068 | -0.588207 |
| H  | 2.487661  | -2.499026 | -1.482958 |
| C  | 3.477810  | -4.091007 | -0.420208 |
| H  | 3.315288  | -4.818684 | -1.204371 |
| C  | 4.139382  | -4.422378 | 0.750900  |
| H  | 4.509914  | -5.427524 | 0.911510  |
| C  | 4.319048  | -3.440495 | 1.711051  |
| H  | 4.831225  | -3.645856 | 2.641834  |
| C  | 3.837691  | -2.168565 | 1.470907  |
| H  | 3.967697  | -1.367746 | 2.185360  |
| N  | -3.620644 | -0.741313 | 0.142324  |
| C  | -4.401340 | 0.225098  | 0.801980  |
| C  | -3.965993 | 0.785687  | 2.004469  |
| H  | -3.024683 | 0.463101  | 2.433215  |
| C  | -4.727715 | 1.748423  | 2.646593  |
| H  | -4.372095 | 2.169415  | 3.580526  |
| C  | -5.941307 | 2.162331  | 2.113781  |
| H  | -6.537373 | 2.911502  | 2.621279  |
| C  | -6.379856 | 1.603375  | 0.920652  |
| H  | -7.320713 | 1.921144  | 0.484993  |
| C  | -5.617823 | 0.650500  | 0.264387  |

|   |           |           |           |
|---|-----------|-----------|-----------|
| H | -5.963540 | 0.230414  | -0.672520 |
| C | -4.223533 | -1.825774 | -0.519024 |
| C | -5.346368 | -2.456807 | 0.021146  |
| H | -5.756763 | -2.104580 | 0.959925  |
| C | -5.933447 | -3.526372 | -0.634524 |
| H | -6.803411 | -4.003220 | -0.196637 |
| C | -5.408455 | -3.999457 | -1.830126 |
| H | -5.866978 | -4.840141 | -2.337157 |
| C | -4.287189 | -3.380366 | -2.365702 |
| H | -3.867044 | -3.731751 | -3.301641 |
| C | -3.701800 | -2.300612 | -1.724109 |
| H | -2.832993 | -1.818331 | -2.156013 |
| O | -0.119244 | 5.345333  | -1.030375 |
| C | -1.546291 | 5.339564  | -1.065810 |
| H | -1.908828 | 4.684426  | -1.858345 |
| H | -1.953839 | 5.009861  | -0.109876 |
| H | -1.832140 | 6.369286  | -1.265106 |

Comp 9

|    |           |           |           |
|----|-----------|-----------|-----------|
| Pt | -2.194682 | -0.875621 | -0.017273 |
| Cl | -4.289775 | -2.076982 | -0.148083 |
| N  | -1.029579 | -2.501688 | -0.315079 |
| N  | 1.206487  | -3.214476 | -0.560282 |
| N  | -3.261607 | 0.823801  | 0.265155  |
| C  | -1.452702 | -3.763146 | -0.491957 |
| H  | -2.525324 | -3.907716 | -0.454088 |
| C  | -0.575599 | -4.789919 | -0.707532 |
| H  | -0.910296 | -5.807222 | -0.850087 |
| C  | 0.783314  | -4.452587 | -0.736583 |
| C  | 0.299705  | -2.270379 | -0.352737 |
| C  | 0.668658  | -0.883021 | -0.132754 |
| C  | 1.992925  | -0.459492 | -0.127825 |
| H  | 2.785110  | -1.176231 | -0.310014 |
| C  | 2.287804  | 0.872870  | 0.122280  |
| C  | 1.231488  | 1.755161  | 0.361908  |
| H  | 1.453476  | 2.795579  | 0.573930  |
| C  | -0.086955 | 1.326385  | 0.330788  |
| H  | -0.864424 | 2.055623  | 0.528329  |
| C  | -0.414779 | -0.007285 | 0.078010  |
| C  | -3.293738 | 1.790242  | -0.657221 |
| H  | -2.689500 | 1.628397  | -1.539824 |
| C  | -4.042301 | 2.940671  | -0.520988 |
| H  | -4.019002 | 3.675406  | -1.312650 |
| C  | -4.800777 | 3.113407  | 0.635484  |
| C  | -4.768577 | 2.102002  | 1.597721  |
| H  | -5.346886 | 2.196799  | 2.507174  |
| C  | -4.002662 | 0.986585  | 1.374287  |
| H  | -3.967381 | 0.179882  | 2.093195  |
| N  | 3.625271  | 1.329454  | 0.144432  |
| C  | 4.603783  | 0.580616  | 0.822758  |
| C  | 4.300959  | -0.048066 | 2.032244  |
| H  | 3.307153  | 0.053677  | 2.451734  |
| C  | 5.259987  | -0.798823 | 2.692573  |
| H  | 5.004376  | -1.277200 | 3.631585  |
| C  | 6.540410  | -0.928375 | 2.171181  |
| H  | 7.289751  | -1.511961 | 2.692739  |
| C  | 6.846658  | -0.300432 | 0.971118  |
| H  | 7.838717  | -0.398164 | 0.544197  |
| C  | 5.889772  | 0.440628  | 0.296894  |
| H  | 6.136029  | 0.915528  | -0.645250 |
| C  | 3.965743  | 2.511823  | -0.535630 |
| C  | 4.907010  | 3.395993  | -0.003444 |

|   |           |           |           |
|---|-----------|-----------|-----------|
| H | 5.379608  | 3.165779  | 0.943903  |
| C | 5.235894  | 4.560290  | -0.677761 |
| H | 5.967857  | 5.233793  | -0.245789 |
| C | 4.625933  | 4.876735  | -1.884754 |
| H | 4.881615  | 5.791368  | -2.406446 |
| C | 3.683234  | 4.004839  | -2.412458 |
| H | 3.201291  | 4.232020  | -3.356982 |
| C | 3.358461  | 2.830757  | -1.751998 |
| H | 2.628916  | 2.152281  | -2.177854 |
| O | 1.654558  | -5.424759 | -0.949128 |
| C | 3.040636  | -5.085599 | -0.980252 |
| H | 3.244754  | -4.373608 | -1.780321 |
| H | 3.354058  | -4.657952 | -0.027588 |
| H | 3.560870  | -6.022134 | -1.164788 |
| O | -5.560461 | 4.173765  | 0.898398  |
| C | -5.617632 | 5.219409  | -0.061490 |
| H | -6.018209 | 4.856290  | -1.010934 |
| H | -6.287890 | 5.967688  | 0.353852  |
| H | -4.629958 | 5.659814  | -0.218248 |

Comp 10

|    |           |           |           |
|----|-----------|-----------|-----------|
| Pt | 2.551205  | 0.035870  | 0.024254  |
| Cl | 4.873655  | 0.703412  | -0.098450 |
| N  | 1.802864  | 1.881014  | -0.317375 |
| N  | -0.199277 | 3.094646  | -0.605529 |
| N  | 3.191428  | -1.859124 | 0.330926  |
| C  | 2.513861  | 3.003892  | -0.507512 |
| H  | 3.589785  | 2.893098  | -0.456684 |
| C  | 1.905459  | 4.203719  | -0.751112 |
| H  | 2.471954  | 5.110837  | -0.904095 |
| C  | 0.505432  | 4.195471  | -0.794035 |
| C  | 0.456909  | 1.968154  | -0.370744 |
| C  | -0.230316 | 0.711244  | -0.132262 |
| C  | -1.616621 | 0.610665  | -0.139404 |
| H  | -2.215620 | 1.489148  | -0.348750 |
| C  | -2.219389 | -0.609452 | 0.132909  |
| C  | -1.402211 | -1.708193 | 0.408670  |
| H  | -1.863526 | -2.662008 | 0.640646  |
| C  | -0.019508 | -1.601001 | 0.389809  |
| H  | 0.559399  | -2.488157 | 0.620368  |
| C  | 0.614230  | -0.388817 | 0.112729  |
| C  | 2.960127  | -2.831890 | -0.558700 |
| H  | 2.364902  | -2.567017 | -1.422207 |
| C  | 3.462471  | -4.101337 | -0.368116 |
| H  | 3.279171  | -4.884141 | -1.090978 |
| C  | 4.199854  | -4.321965 | 0.781170  |
| H  | 4.618622  | -5.298620 | 1.001383  |
| C  | 3.930011  | -2.167477 | 1.406358  |
| H  | 4.119300  | -1.361524 | 2.103531  |
| N  | -3.625727 | -0.739201 | 0.142599  |
| C  | -4.410841 | 0.237401  | 0.782269  |
| C  | -3.984085 | 0.816435  | 1.978939  |
| H  | -3.045676 | 0.501058  | 2.419286  |
| C  | -4.751182 | 1.788019  | 2.601108  |
| H  | -4.402541 | 2.223474  | 3.531015  |
| C  | -5.961574 | 2.192200  | 2.053771  |
| H  | -6.561935 | 2.948175  | 2.545876  |
| C  | -6.391587 | 1.614661  | 0.866410  |
| H  | -7.329964 | 1.924468  | 0.419847  |
| C  | -5.624012 | 0.652882  | 0.229896  |
| H  | -5.962930 | 0.217786  | -0.702650 |
| C  | -4.225943 | -1.836232 | -0.501122 |

|   |           |           |           |
|---|-----------|-----------|-----------|
| C | -5.345648 | -2.462290 | 0.050728  |
| H | -5.755463 | -2.096909 | 0.984738  |
| C | -5.930433 | -3.543581 | -0.587639 |
| H | -6.798082 | -4.016595 | -0.141137 |
| C | -5.405881 | -4.032894 | -1.776859 |
| H | -5.862582 | -4.882614 | -2.270287 |
| C | -4.287753 | -3.418314 | -2.324094 |
| H | -3.868499 | -3.782287 | -3.255602 |
| C | -3.704869 | -2.327055 | -1.699936 |
| H | -2.838861 | -1.847927 | -2.140943 |
| O | -0.109872 | 5.340740  | -1.032076 |
| C | -1.536953 | 5.337728  | -1.075361 |
| H | -1.896159 | 4.683416  | -1.870034 |
| H | -1.950096 | 5.008674  | -0.121652 |
| H | -1.819564 | 6.368028  | -1.276039 |
| N | 4.431273  | -3.356472 | 1.667323  |

Comp 11

|    |           |           |           |
|----|-----------|-----------|-----------|
| Pt | 2.554728  | -0.263747 | 0.066522  |
| Cl | 4.877002  | 0.406914  | 0.021245  |
| N  | 1.822205  | 1.598875  | -0.180508 |
| N  | -0.175059 | 2.833455  | -0.405714 |
| N  | 3.172839  | -2.178007 | 0.280927  |
| C  | 2.539044  | 2.710373  | -0.309829 |
| H  | 3.614655  | 2.588832  | -0.263197 |
| C  | 1.929510  | 3.939031  | -0.494674 |
| H  | 2.513560  | 4.841039  | -0.600017 |
| C  | 0.550277  | 3.931223  | -0.536300 |
| C  | 0.464235  | 1.690135  | -0.229154 |
| C  | -0.224191 | 0.427684  | -0.061550 |
| C  | -1.612716 | 0.334390  | -0.071644 |
| H  | -2.209253 | 1.226143  | -0.223836 |
| C  | -2.217761 | -0.897838 | 0.125333  |
| C  | -1.401672 | -2.015615 | 0.325240  |
| H  | -1.866148 | -2.980879 | 0.495189  |
| C  | -0.019587 | -1.913864 | 0.310445  |
| H  | 0.558677  | -2.815406 | 0.476607  |
| C  | 0.617720  | -0.687458 | 0.113791  |
| C  | 3.000663  | -3.063891 | -0.709129 |
| H  | 2.482433  | -2.703688 | -1.587303 |
| C  | 3.456186  | -4.363981 | -0.618018 |
| H  | 3.296592  | -5.040542 | -1.447192 |
| C  | 4.106378  | -4.770954 | 0.535507  |
| H  | 4.470581  | -5.786151 | 0.635905  |
| C  | 4.283041  | -3.852237 | 1.556784  |
| H  | 4.786496  | -4.118368 | 2.476802  |
| C  | 3.810857  | -2.565009 | 1.392838  |
| H  | 3.939570  | -1.810853 | 2.156485  |
| N  | -3.623172 | -1.024955 | 0.136828  |
| C  | -4.402839 | -0.085892 | 0.838041  |
| C  | -3.971243 | 0.415727  | 2.067191  |
| H  | -3.032790 | 0.070796  | 2.484788  |
| C  | -4.733670 | 1.349196  | 2.750414  |
| H  | -4.381203 | 1.725843  | 3.704207  |
| C  | -5.943989 | 1.789882  | 2.232166  |
| H  | -6.540385 | 2.516302  | 2.771320  |
| C  | -6.378848 | 1.288630  | 1.012426  |
| H  | -7.317040 | 1.628874  | 0.588278  |
| C  | -5.615649 | 0.366199  | 0.315305  |
| H  | -5.957517 | -0.009086 | -0.641850 |
| C  | -4.230622 | -2.085148 | -0.560131 |
| C  | -5.344430 | -2.740786 | -0.031479 |

|   |           |           |           |
|---|-----------|-----------|-----------|
| H | -5.744014 | -2.427258 | 0.925516  |
| C | -5.936429 | -3.785280 | -0.722301 |
| H | -6.799495 | -4.282413 | -0.293481 |
| C | -5.424823 | -4.207765 | -1.942376 |
| H | -5.887192 | -5.028939 | -2.477133 |
| C | -4.312678 | -3.563473 | -2.467115 |
| H | -3.904038 | -3.874991 | -3.422044 |
| C | -3.722886 | -2.508055 | -1.790014 |
| H | -2.862410 | -2.004045 | -2.213850 |
| C | -0.251739 | 5.201900  | -0.738436 |
| F | 0.540448  | 6.268365  | -0.862065 |
| F | -1.002447 | 5.123324  | -1.839404 |
| F | -1.070154 | 5.420669  | 0.293050  |

Comp 12

|    |           |           |           |
|----|-----------|-----------|-----------|
| Pt | 2.588180  | 2.733349  | 8.899064  |
| Cl | 3.002491  | 3.617901  | 6.686889  |
| N  | 3.099270  | 4.425607  | 9.875287  |
| N  | 3.281551  | 5.396701  | 12.021159 |
| N  | 2.034398  | 0.994571  | 8.022071  |
| C  | 3.506017  | 5.562718  | 9.311432  |
| H  | 3.570986  | 5.556691  | 8.230052  |
| C  | 3.816841  | 6.663693  | 10.082518 |
| H  | 4.146976  | 7.586580  | 9.626956  |
| C  | 3.683913  | 6.526296  | 11.453667 |
| H  | 3.908724  | 7.351845  | 12.122218 |
| C  | 2.999449  | 4.374219  | 11.228627 |
| C  | 2.563277  | 3.088218  | 11.741544 |
| C  | 2.419079  | 2.839559  | 13.101527 |
| H  | 2.611656  | 3.643446  | 13.802963 |
| C  | 2.011360  | 1.587860  | 13.548755 |
| C  | 1.765151  | 0.605444  | 12.582672 |
| H  | 1.474954  | -0.389892 | 12.903126 |
| C  | 1.910156  | 0.856661  | 11.226373 |
| H  | 1.718761  | 0.046172  | 10.532377 |
| C  | 2.306704  | 2.110756  | 10.760066 |
| C  | 0.757826  | 0.590209  | 8.043742  |
| H  | 0.067204  | 1.219595  | 8.588224  |
| C  | 0.342117  | -0.563908 | 7.409889  |
| H  | -0.701832 | -0.845296 | 7.452639  |
| C  | 1.274144  | -1.334984 | 6.734819  |
| H  | 0.977032  | -2.247344 | 6.232120  |
| C  | 2.593492  | -0.913812 | 6.714368  |
| H  | 3.359920  | -1.478041 | 6.199552  |
| C  | 2.935962  | 0.257114  | 7.361395  |
| H  | 3.949800  | 0.632433  | 7.359636  |
| C  | 1.850579  | 1.302999  | 14.988096 |
| C  | 0.843870  | 0.448509  | 15.443701 |
| C  | 2.700421  | 1.881155  | 15.934035 |
| C  | 0.692076  | 0.181602  | 16.795629 |
| H  | 0.156353  | 0.004487  | 14.732355 |
| C  | 2.548755  | 1.615921  | 17.286131 |
| H  | 3.504193  | 2.530130  | 15.604535 |
| C  | 1.543680  | 0.764321  | 17.724102 |
| H  | -0.101911 | -0.478908 | 17.125930 |
| H  | 3.225397  | 2.070887  | 18.000927 |
| H  | 1.425120  | 0.556193  | 18.781274 |

Comp 13

|    |          |          |          |
|----|----------|----------|----------|
| Pt | 2.643203 | 2.754746 | 8.910045 |
| Cl | 3.079894 | 3.651346 | 6.705169 |



|   |           |           |           |
|---|-----------|-----------|-----------|
| N | 3.114697  | 4.453223  | 9.894409  |
| N | 3.237394  | 5.429190  | 12.042710 |
| N | 2.110890  | 1.009577  | 8.025588  |
| C | 3.509103  | 5.598110  | 9.337541  |
| H | 3.593430  | 5.592607  | 8.257483  |
| C | 3.783206  | 6.705628  | 10.113226 |
| H | 4.102811  | 7.634908  | 9.663128  |
| C | 3.627060  | 6.566504  | 11.481763 |
| H | 3.821768  | 7.397090  | 12.153560 |
| C | 2.991137  | 4.400684  | 11.245842 |
| C | 2.572588  | 3.106101  | 11.751575 |
| C | 2.413917  | 2.853889  | 13.109267 |
| H | 2.578848  | 3.661944  | 13.812888 |
| C | 2.027031  | 1.593572  | 13.550621 |
| C | 1.818354  | 0.605964  | 12.580780 |
| H | 1.546614  | -0.395983 | 12.896863 |
| C | 1.977149  | 0.860869  | 11.226779 |
| H | 1.815349  | 0.046711  | 10.529605 |
| C | 2.350683  | 2.124246  | 10.765762 |
| C | 0.841688  | 0.569771  | 8.064060  |
| H | 0.143190  | 1.175806  | 8.624789  |
| C | 0.435235  | -0.579695 | 7.436126  |
| H | -0.597648 | -0.897300 | 7.488452  |
| C | 1.369744  | -1.338527 | 6.727869  |
| C | 2.685979  | -0.882478 | 6.685825  |
| H | 3.464513  | -1.411005 | 6.155285  |
| C | 3.003280  | 0.290089  | 7.338175  |
| H | 4.011589  | 0.679804  | 7.311541  |
| C | 1.849219  | 1.305348  | 14.987281 |
| C | 0.858215  | 0.424127  | 15.426280 |
| C | 2.665975  | 1.907107  | 15.947640 |
| C | 0.689796  | 0.154105  | 16.775605 |
| H | 0.195576  | -0.038876 | 14.703551 |
| C | 2.497424  | 1.639060  | 17.297157 |
| H | 3.457353  | 2.577793  | 15.631968 |
| C | 1.508475  | 0.760540  | 17.718393 |
| H | -0.091619 | -0.527649 | 17.092486 |
| H | 3.148428  | 2.113141  | 18.023264 |
| H | 1.376829  | 0.550180  | 18.773577 |
| O | 0.927945  | -2.447903 | 6.141613  |
| C | 1.853358  | -3.240716 | 5.410685  |
| H | 2.652386  | -3.605931 | 6.060289  |
| H | 1.283845  | -4.082627 | 5.025438  |
| H | 2.279077  | -2.675302 | 4.578390  |

Comp 14

|    |           |           |           |
|----|-----------|-----------|-----------|
| Pt | 2.590396  | -0.203991 | -0.036669 |
| Cl | 4.941839  | -0.736546 | -0.190356 |
| N  | 1.946484  | -2.065487 | -0.483111 |
| N  | 0.006071  | -3.377909 | -0.789544 |
| N  | 3.120128  | 1.692249  | 0.434989  |
| C  | 2.717859  | -3.121541 | -0.741097 |
| H  | 3.786282  | -2.946134 | -0.705039 |
| C  | 2.161284  | -4.349634 | -1.033586 |
| H  | 2.785136  | -5.206990 | -1.243361 |
| C  | 0.779036  | -4.425974 | -1.044093 |
| H  | 0.272306  | -5.360439 | -1.265029 |
| C  | 0.599294  | -2.226838 | -0.517659 |
| C  | -0.148915 | -1.014943 | -0.233538 |
| C  | -1.538953 | -0.981115 | -0.248984 |
| H  | -2.098351 | -1.879404 | -0.482554 |
| C  | -2.190267 | 0.208807  | 0.028891  |

|   |           |           |           |
|---|-----------|-----------|-----------|
| C | -1.438704 | 1.350612  | 0.303591  |
| H | -1.951880 | 2.278669  | 0.530848  |
| C | -0.052585 | 1.309934  | 0.291783  |
| H | 0.486887  | 2.226495  | 0.499911  |
| C | 0.636417  | 0.123653  | 0.032411  |
| C | 2.969273  | 2.154221  | 1.683061  |
| H | 2.516492  | 1.474673  | 2.392241  |
| C | 3.366600  | 3.425047  | 2.048403  |
| H | 3.227006  | 3.750374  | 3.070895  |
| C | 3.934740  | 4.253515  | 1.094522  |
| H | 4.252601  | 5.256508  | 1.352130  |
| C | 4.089777  | 3.772105  | -0.194941 |
| H | 4.529792  | 4.377737  | -0.976174 |
| C | 3.677677  | 2.486885  | -0.487177 |
| H | 3.789877  | 2.064284  | -1.476036 |
| C | -6.325891 | 2.569392  | -2.051331 |
| C | -4.971738 | 2.769313  | -2.338615 |
| C | -3.980663 | 2.050800  | -1.691396 |
| C | -4.376558 | 1.119568  | -0.737160 |
| C | -5.738409 | 0.897002  | -0.444122 |
| C | -6.715278 | 1.633595  | -1.109304 |
| H | -7.074667 | 3.151343  | -2.575858 |
| H | -4.688853 | 3.502025  | -3.085969 |
| H | -2.935116 | 2.209077  | -1.925411 |
| H | -7.766104 | 1.474090  | -0.893805 |
| C | -4.443144 | -0.499081 | 0.821054  |
| C | -4.124841 | -1.467262 | 1.767308  |
| C | -5.170687 | -2.082315 | 2.434628  |
| C | -6.503083 | -1.746127 | 2.173884  |
| C | -6.814347 | -0.775183 | 1.238430  |
| C | -5.781080 | -0.140160 | 0.553968  |
| H | -3.096358 | -1.732634 | 1.978846  |
| H | -4.948745 | -2.841596 | 3.176000  |
| H | -7.296440 | -2.250306 | 2.713183  |
| H | -7.847795 | -0.510641 | 1.042753  |
| N | -3.601991 | 0.269685  | 0.034107  |

Comp 15

|    |           |           |           |
|----|-----------|-----------|-----------|
| Pt | 2.279544  | -0.835641 | -0.124767 |
| Cl | 4.528788  | -1.708787 | -0.265642 |
| N  | 1.372967  | -2.633351 | -0.282666 |
| N  | -0.737175 | -3.696133 | -0.312756 |
| N  | 3.082544  | 1.014511  | 0.069977  |
| C  | 1.982944  | -3.812519 | -0.403140 |
| H  | 3.065493  | -3.783457 | -0.431078 |
| C  | 1.254492  | -4.981476 | -0.483516 |
| H  | 1.747637  | -5.938309 | -0.581427 |
| C  | -0.124132 | -4.866999 | -0.430507 |
| H  | -0.760731 | -5.744861 | -0.484509 |
| C  | 0.016528  | -2.610671 | -0.243746 |
| C  | -0.548933 | -1.278005 | -0.128414 |
| C  | -1.921170 | -1.053925 | -0.115411 |
| H  | -2.606785 | -1.890500 | -0.183978 |
| C  | -2.393888 | 0.243995  | -0.024254 |
| C  | -1.485799 | 1.299904  | 0.036167  |
| H  | -1.860995 | 2.314927  | 0.110789  |
| C  | -0.119257 | 1.065220  | 0.003852  |
| H  | 0.547158  | 1.918963  | 0.041124  |
| C  | 0.393124  | -0.232028 | -0.066735 |
| C  | 2.980922  | 1.698080  | 1.214102  |
| H  | 2.412105  | 1.226443  | 2.004233  |
| C  | 3.555154  | 2.936562  | 1.407824  |

|   |           |           |           |
|---|-----------|-----------|-----------|
| H | 3.431796  | 3.424802  | 2.363521  |
| C | 4.273698  | 3.513002  | 0.361645  |
| C | 4.380067  | 2.797444  | -0.832952 |
| H | 4.932795  | 3.209093  | -1.666918 |
| C | 3.784771  | 1.566257  | -0.934162 |
| H | 3.862325  | 0.981132  | -1.839856 |
| C | -6.300789 | 2.641725  | -2.470400 |
| C | -4.948866 | 2.591754  | -2.825982 |
| C | -4.023940 | 1.902948  | -2.059555 |
| C | -4.484719 | 1.260135  | -0.915614 |
| C | -5.846389 | 1.292054  | -0.547511 |
| C | -6.755687 | 1.992670  | -1.336039 |
| H | -6.996652 | 3.191382  | -3.093400 |
| H | -4.615442 | 3.101629  | -3.722812 |
| H | -2.979858 | 1.864922  | -2.345413 |
| H | -7.805700 | 2.026372  | -1.066736 |
| C | -4.671662 | 0.038471  | 0.960911  |
| C | -4.426356 | -0.740372 | 2.086534  |
| C | -5.503018 | -1.050314 | 2.900187  |
| C | -6.794193 | -0.598344 | 2.608112  |
| C | -7.031618 | 0.182674  | 1.490732  |
| C | -5.966023 | 0.509879  | 0.655857  |
| H | -3.429357 | -1.092499 | 2.321552  |
| H | -5.338874 | -1.657042 | 3.783577  |
| H | -7.613751 | -0.862066 | 3.266332  |
| H | -8.032576 | 0.536992  | 1.269816  |
| N | -3.784308 | 0.499331  | 0.003956  |
| O | 4.871892  | 4.699858  | 0.410702  |
| C | 4.790010  | 5.449864  | 1.614846  |
| H | 5.247956  | 4.906320  | 2.444622  |
| H | 5.343150  | 6.367422  | 1.431319  |
| H | 3.751537  | 5.690475  | 1.854849  |

Comp 17

|    |           |           |           |
|----|-----------|-----------|-----------|
| Pt | 2.620531  | 2.713131  | 8.889413  |
| Cl | 3.024932  | 3.653776  | 6.695617  |
| N  | 3.193173  | 4.347606  | 9.914159  |
| N  | 1.985619  | 1.027859  | 7.960688  |
| N  | 3.893429  | 6.501478  | 11.501976 |
| C  | 3.623738  | 5.487470  | 9.373096  |
| H  | 3.678645  | 5.518523  | 8.292628  |
| C  | 3.971839  | 6.557425  | 10.175426 |
| H  | 4.321080  | 7.480681  | 9.727658  |
| C  | 3.466958  | 5.365850  | 12.027592 |
| H  | 3.403092  | 5.317478  | 13.108660 |
| C  | 3.106292  | 4.257896  | 11.260424 |
| C  | 2.641811  | 2.973226  | 11.749872 |
| C  | 2.509123  | 2.672129  | 13.100007 |
| H  | 2.732681  | 3.397294  | 13.874016 |
| C  | 2.083629  | 1.407835  | 13.488045 |
| C  | 1.802947  | 0.455775  | 12.511562 |
| H  | 1.479573  | -0.539688 | 12.787945 |
| C  | 1.938667  | 0.773853  | 11.162453 |
| H  | 1.715195  | -0.003274 | 10.440277 |
| C  | 2.350280  | 2.032070  | 10.737216 |
| C  | 0.699600  | 0.658149  | 8.020167  |
| H  | 0.050866  | 1.281998  | 8.619667  |
| C  | 0.224183  | -0.455625 | 7.356855  |
| H  | -0.824944 | -0.709474 | 7.432146  |
| C  | 1.104419  | -1.222824 | 6.611536  |
| H  | 0.760010  | -2.104512 | 6.084777  |
| C  | 2.433484  | -0.837657 | 6.551931  |

|   |          |           |           |
|---|----------|-----------|-----------|
| H | 3.160922 | -1.400294 | 5.981784  |
| C | 2.836605 | 0.295104  | 7.231035  |
| H | 3.859415 | 0.643542  | 7.199768  |
| O | 1.978328 | 1.195066  | 14.822283 |
| C | 1.557135 | -0.080546 | 15.254927 |
| H | 1.539315 | -0.041620 | 16.342435 |
| H | 0.553876 | -0.317448 | 14.886587 |
| H | 2.253043 | -0.862202 | 14.933917 |

Comp 18

|    |           |           |           |
|----|-----------|-----------|-----------|
| Pt | -2.509903 | -0.230101 | -0.037662 |
| Cl | -4.862167 | -0.773374 | -0.184623 |
| N  | -1.837245 | -2.074321 | -0.515817 |
| N  | -3.061365 | 1.664474  | 0.414264  |
| N  | -2.167355 | -4.328512 | -1.117902 |
| C  | -2.606509 | -3.131924 | -0.784170 |
| H  | -3.674739 | -2.961734 | -0.715828 |
| C  | -0.843023 | -4.475943 | -1.190164 |
| H  | -0.477663 | -5.459989 | -1.466667 |
| C  | 0.037485  | -3.448282 | -0.931147 |
| H  | 1.105164  | -3.603931 | -0.996687 |
| C  | -0.489183 | -2.210798 | -0.582309 |
| C  | 0.246120  | -1.005959 | -0.257453 |
| C  | 1.637989  | -0.940804 | -0.261894 |
| H  | 2.233349  | -1.803381 | -0.537452 |
| C  | 2.280018  | 0.234944  | 0.098163  |
| C  | 1.497800  | 1.335733  | 0.457696  |
| H  | 1.989075  | 2.254818  | 0.757790  |
| C  | 0.114130  | 1.273165  | 0.433182  |
| H  | -0.439045 | 2.158646  | 0.724234  |
| C  | -0.560098 | 0.105424  | 0.070586  |
| C  | -2.837891 | 2.664457  | -0.448199 |
| H  | -2.317545 | 2.401815  | -1.359065 |
| C  | -3.245076 | 3.959062  | -0.193683 |
| H  | -3.044814 | 4.730959  | -0.925001 |
| C  | -3.900126 | 4.238197  | 0.994532  |
| H  | -4.227260 | 5.245448  | 1.222229  |
| C  | -4.130105 | 3.201852  | 1.884140  |
| H  | -4.639542 | 3.365422  | 2.824628  |
| C  | -3.704308 | 1.929173  | 1.558871  |
| H  | -3.875205 | 1.087676  | 2.215498  |
| N  | 3.688218  | 0.320458  | 0.109596  |
| C  | 4.450528  | -0.742734 | 0.629034  |
| C  | 4.030913  | -1.422058 | 1.774281  |
| H  | 3.116092  | -1.118684 | 2.269494  |
| C  | 4.775698  | -2.477083 | 2.276051  |
| H  | 4.433784  | -2.990561 | 3.167825  |
| C  | 5.956684  | -2.866589 | 1.658085  |
| H  | 6.539750  | -3.688407 | 2.056468  |
| C  | 6.380067  | -2.188881 | 0.522592  |
| H  | 7.295553  | -2.484929 | 0.022496  |
| C  | 5.633775  | -1.142378 | 0.005367  |
| H  | 5.966548  | -0.627871 | -0.888180 |
| C  | 4.319678  | 1.454361  | -0.434704 |
| C  | 5.458592  | 1.992337  | 0.167721  |
| H  | 5.858124  | 1.529830  | 1.062385  |
| C  | 6.075080  | 3.109500  | -0.371374 |
| H  | 6.957476  | 3.513205  | 0.112628  |
| C  | 5.563347  | 3.721285  | -1.508365 |
| H  | 6.044739  | 4.598834  | -1.923380 |
| C  | 4.426527  | 3.193591  | -2.105295 |

|   |          |          |           |
|---|----------|----------|-----------|
| H | 4.017380 | 3.654185 | -2.997657 |
| C | 3.812013 | 2.067429 | -1.581438 |
| H | 2.931532 | 1.656739 | -2.061154 |

Comp 19

|    |           |           |           |
|----|-----------|-----------|-----------|
| Pt | 2.580083  | 2.735530  | 8.907033  |
| Cl | 2.988788  | 3.606771  | 6.688690  |
| N  | 3.082113  | 4.425853  | 9.877530  |
| N  | 2.033263  | 0.991634  | 8.032583  |
| N  | 3.699769  | 6.651873  | 11.396848 |
| C  | 3.481073  | 5.559874  | 9.301318  |
| H  | 3.545473  | 5.556137  | 8.220944  |
| C  | 3.788222  | 6.666450  | 10.069717 |
| H  | 4.112492  | 7.584747  | 9.593959  |
| C  | 3.304233  | 5.521993  | 11.957323 |
| H  | 3.232280  | 5.508925  | 13.038886 |
| C  | 2.985239  | 4.377659  | 11.225272 |
| C  | 2.556562  | 3.096004  | 11.752438 |
| C  | 2.410540  | 2.830465  | 13.111004 |
| H  | 2.592410  | 3.610069  | 13.842336 |
| C  | 2.006012  | 1.574495  | 13.550821 |
| C  | 1.760279  | 0.596884  | 12.581947 |
| H  | 1.471373  | -0.400387 | 12.896979 |
| C  | 1.906237  | 0.859118  | 11.228067 |
| H  | 1.716505  | 0.053765  | 10.527771 |
| C  | 2.300742  | 2.115463  | 10.768865 |
| C  | 0.754785  | 0.593068  | 8.037160  |
| H  | 0.058005  | 1.229678  | 8.565196  |
| C  | 0.344677  | -0.564551 | 7.406149  |
| H  | -0.700965 | -0.841395 | 7.434135  |
| C  | 1.284471  | -1.344923 | 6.752900  |
| H  | 0.991751  | -2.260214 | 6.252978  |
| C  | 2.605812  | -0.929506 | 6.750433  |
| H  | 3.378034  | -1.501198 | 6.252845  |
| C  | 2.942664  | 0.245442  | 7.393011  |
| H  | 3.958089  | 0.616383  | 7.404679  |
| C  | 1.847637  | 1.283276  | 14.989136 |
| C  | 0.829868  | 0.440861  | 15.442317 |
| C  | 2.710283  | 1.841567  | 15.935232 |
| C  | 0.679122  | 0.167282  | 16.792970 |
| H  | 0.133593  | 0.012196  | 14.730086 |
| C  | 2.559612  | 1.569607  | 17.286180 |
| H  | 3.524412  | 2.478357  | 15.607107 |
| C  | 1.542997  | 0.730841  | 17.721985 |
| H  | -0.123451 | -0.483369 | 17.121961 |
| H  | 3.246297  | 2.008507  | 18.001392 |
| H  | 1.425216  | 0.517353  | 18.778150 |

Comp 20

|    |           |           |           |
|----|-----------|-----------|-----------|
| Pt | 2.586541  | -0.199077 | -0.036777 |
| Cl | 4.943695  | -0.706763 | -0.183314 |
| N  | 1.954899  | -2.057780 | -0.481213 |
| N  | 0.881416  | -4.538220 | -1.064790 |
| N  | 3.106637  | 1.701566  | 0.434867  |
| C  | 2.742426  | -3.103014 | -0.733676 |
| H  | 3.809247  | -2.924471 | -0.696766 |
| C  | 2.195434  | -4.338464 | -1.025116 |
| H  | 2.842240  | -5.183684 | -1.230093 |
| C  | 0.109866  | -3.494277 | -0.813854 |
| H  | -0.961520 | -3.656582 | -0.845963 |
| C  | 0.614263  | -2.228047 | -0.518091 |

|   |           |           |           |
|---|-----------|-----------|-----------|
| C | -0.151387 | -1.027313 | -0.238425 |
| C | -1.542944 | -0.980922 | -0.251627 |
| H | -2.133938 | -1.858541 | -0.485987 |
| C | -2.192263 | 0.210189  | 0.030371  |
| C | -1.441402 | 1.350114  | 0.306101  |
| H | -1.952251 | 2.278616  | 0.535898  |
| C | -0.055615 | 1.303278  | 0.291399  |
| H | 0.487650  | 2.217412  | 0.499819  |
| C | 0.631070  | 0.117212  | 0.030304  |
| C | 2.960224  | 2.159714  | 1.684809  |
| H | 2.516752  | 1.475711  | 2.395626  |
| C | 3.351044  | 3.432549  | 2.049993  |
| H | 3.215839  | 3.755019  | 3.073962  |
| C | 3.907215  | 4.266601  | 1.093935  |
| H | 4.219669  | 5.271314  | 1.351427  |
| C | 4.057554  | 3.788826  | -0.197453 |
| H | 4.488491  | 4.399014  | -0.980170 |
| C | 3.652967  | 2.501230  | -0.489535 |
| H | 3.762365  | 2.081094  | -1.479785 |
| C | -6.332951 | 2.556486  | -2.055041 |
| C | -4.979145 | 2.761995  | -2.339876 |
| C | -3.986282 | 2.047518  | -1.690894 |
| C | -4.380342 | 1.114844  | -0.737465 |
| C | -5.741609 | 0.886602  | -0.446791 |
| C | -6.720308 | 1.619152  | -1.113745 |
| H | -7.083112 | 3.135565  | -2.580735 |
| H | -4.697923 | 3.496111  | -3.086453 |
| H | -2.940917 | 2.210436  | -1.922562 |
| H | -7.770826 | 1.455605  | -0.899888 |
| C | -4.443237 | -0.503052 | 0.822432  |
| C | -4.122719 | -1.467552 | 1.771656  |
| C | -5.167349 | -2.086843 | 2.437109  |
| C | -6.500540 | -1.757727 | 2.171885  |
| C | -6.813935 | -0.789251 | 1.234539  |
| C | -5.781984 | -0.150233 | 0.551864  |
| H | -3.093421 | -1.725599 | 1.988548  |
| H | -4.943714 | -2.843157 | 3.180980  |
| H | -7.292915 | -2.264912 | 2.709760  |
| H | -7.848088 | -0.529623 | 1.036134  |
| N | -3.603663 | 0.268143  | 0.035756  |

Comp 21

|    |           |           |           |
|----|-----------|-----------|-----------|
| Pt | 2.473747  | -0.152867 | -0.284758 |
| Cl | 4.754983  | 0.383870  | -0.898372 |
| N  | 1.692552  | 1.671631  | -0.652377 |
| N  | 3.144810  | -2.001702 | 0.199066  |
| C  | 2.412248  | 2.703324  | -1.154045 |
| H  | 3.428963  | 2.453924  | -1.434234 |
| C  | 0.732399  | 4.191392  | -0.866083 |
| C  | -0.092786 | 3.192377  | -0.284017 |
| C  | 0.410135  | 1.859361  | -0.300523 |
| C  | -0.283293 | 0.619451  | 0.014855  |
| C  | -1.668484 | 0.481064  | 0.099478  |
| H  | -2.342864 | 1.305201  | -0.082028 |
| C  | -2.236667 | -0.758944 | 0.355698  |
| C  | -1.410923 | -1.868040 | 0.515091  |
| H  | -1.829507 | -2.846932 | 0.711484  |
| C  | -0.033219 | -1.732389 | 0.383591  |
| H  | 0.569355  | -2.628992 | 0.471547  |
| C  | 0.570465  | -0.507943 | 0.118015  |
| C  | 3.683998  | -2.791986 | -0.738284 |
| H  | 3.715012  | -2.388290 | -1.740499 |

|   |           |           |           |
|---|-----------|-----------|-----------|
| C | 4.178097  | -4.047498 | -0.444009 |
| H | 4.597019  | -4.651281 | -1.238234 |
| C | 4.131746  | -4.501395 | 0.863756  |
| C | 3.584999  | -3.676548 | 1.833202  |
| H | 3.529384  | -3.980771 | 2.870123  |
| C | 3.098401  | -2.437964 | 1.464690  |
| H | 2.655375  | -1.764198 | 2.185206  |
| C | -1.309487 | 3.593766  | 0.311263  |
| C | -1.716989 | 4.899522  | 0.251320  |
| H | -2.644152 | 5.193643  | 0.728318  |
| C | -0.935107 | 5.865131  | -0.406732 |
| H | -1.279838 | 6.891375  | -0.457192 |
| C | 0.274139  | 5.520166  | -0.945762 |
| H | 0.919581  | 6.251382  | -1.416972 |
| H | -1.902481 | 2.883488  | 0.866620  |
| N | 1.978578  | 3.912483  | -1.327093 |
| O | -3.590239 | -0.792699 | 0.415972  |
| C | -4.208595 | -2.041829 | 0.638894  |
| H | -5.280415 | -1.853180 | 0.643318  |
| H | -3.971226 | -2.753740 | -0.158061 |
| H | -3.914539 | -2.468170 | 1.603241  |
| H | 4.516549  | -5.480163 | 1.123322  |

Comp 22

|    |           |           |           |
|----|-----------|-----------|-----------|
| Pt | 2.472535  | -0.154000 | -0.297177 |
| Cl | 4.748204  | 0.376967  | -0.942528 |
| N  | 1.691138  | 1.670596  | -0.660984 |
| N  | 3.145736  | -2.004729 | 0.191205  |
| C  | 2.408485  | 2.702332  | -1.166086 |
| H  | 3.423590  | 2.452246  | -1.451801 |
| C  | 0.730842  | 4.191224  | -0.869243 |
| C  | -0.091618 | 3.192542  | -0.283009 |
| C  | 0.410712  | 1.859219  | -0.302229 |
| C  | -0.281794 | 0.619745  | 0.016247  |
| C  | -1.666945 | 0.482002  | 0.104440  |
| H  | -2.341190 | 1.306890  | -0.074234 |
| C  | -2.235028 | -0.758055 | 0.359801  |
| C  | -1.409335 | -1.867966 | 0.514580  |
| H  | -1.828017 | -2.847089 | 0.709872  |
| C  | -0.031946 | -1.732857 | 0.379809  |
| H  | 0.570789  | -2.629710 | 0.463513  |
| C  | 0.572177  | -0.508047 | 0.115625  |
| C  | 3.712281  | -2.793224 | -0.727774 |
| H  | 3.769528  | -2.391650 | -1.729933 |
| C  | 4.209518  | -4.047504 | -0.442967 |
| H  | 4.647662  | -4.628491 | -1.241459 |
| C  | 4.136572  | -4.516618 | 0.867259  |
| C  | 3.555921  | -3.687280 | 1.829385  |
| H  | 3.484775  | -4.012988 | 2.858635  |
| C  | 3.076611  | -2.458253 | 1.454354  |
| H  | 2.615310  | -1.796086 | 2.174239  |
| C  | -1.305129 | 3.594318  | 0.318509  |
| C  | -1.712617 | 4.900238  | 0.260753  |
| H  | -2.637353 | 5.194545  | 0.742346  |
| C  | -0.933774 | 5.865613  | -0.401151 |
| H  | -1.278386 | 6.891983  | -0.449846 |
| C  | 0.272581  | 5.520150  | -0.946371 |
| H  | 0.915719  | 6.251181  | -1.420947 |
| H  | -1.895792 | 2.884062  | 0.876507  |
| N  | 1.974615  | 3.911869  | -1.336662 |
| O  | -3.588729 | -0.791435 | 0.423369  |
| C  | -4.206716 | -2.040731 | 0.645674  |

|   |           |           |           |
|---|-----------|-----------|-----------|
| H | -5.278579 | -1.852252 | 0.651463  |
| H | -3.970145 | -2.751837 | -0.152247 |
| H | -3.911586 | -2.468108 | 1.609266  |
| O | 4.580039  | -5.701586 | 1.279025  |
| C | 5.178977  | -6.567765 | 0.325123  |
| H | 6.067678  | -6.108910 | -0.114552 |
| H | 5.464256  | -7.461847 | 0.873633  |
| H | 4.468612  | -6.832308 | -0.461835 |

Comp 23

|    |           |           |           |
|----|-----------|-----------|-----------|
| Pt | 2.570624  | -0.050661 | -0.020754 |
| Cl | 4.888673  | 0.571806  | -0.304922 |
| N  | 1.783619  | 1.766544  | -0.411766 |
| N  | 3.232292  | -1.919810 | 0.403168  |
| C  | 2.527652  | 2.833111  | -0.789283 |
| H  | 3.584240  | 2.627883  | -0.915966 |
| C  | 0.762868  | 4.248706  | -0.748777 |
| C  | -0.097415 | 3.211777  | -0.298460 |
| C  | 0.456705  | 1.898996  | -0.250483 |
| C  | -0.223215 | 0.633311  | -0.030135 |
| C  | -1.605247 | 0.442074  | -0.108395 |
| H  | -2.264311 | 1.241936  | -0.411279 |
| C  | -2.163827 | -0.799588 | 0.154294  |
| C  | -1.314066 | -1.860969 | 0.472022  |
| H  | -1.739652 | -2.832137 | 0.699290  |
| C  | 0.060271  | -1.695453 | 0.461006  |
| H  | 0.678763  | -2.559362 | 0.674307  |
| C  | 0.650214  | -0.460319 | 0.188077  |
| C  | 3.152647  | -2.893238 | -0.512850 |
| H  | 2.687614  | -2.627993 | -1.452627 |
| C  | 3.634220  | -4.165624 | -0.276154 |
| H  | 3.549048  | -4.916930 | -1.050143 |
| C  | 4.215550  | -4.449114 | 0.948819  |
| H  | 4.599215  | -5.439249 | 1.162926  |
| C  | 4.297812  | -3.439426 | 1.893349  |
| H  | 4.744770  | -3.607390 | 2.864337  |
| C  | 3.801632  | -2.188169 | 1.584775  |
| H  | 3.853122  | -1.367732 | 2.287225  |
| N  | -3.561092 | -0.981737 | 0.102132  |
| C  | -4.414351 | 0.002068  | 0.637984  |
| C  | -4.089500 | 0.648366  | 1.832411  |
| H  | -3.179061 | 0.378929  | 2.354708  |
| C  | -4.923266 | 1.626701  | 2.349694  |
| H  | -4.654447 | 2.114741  | 3.279967  |
| C  | -6.100638 | 1.969874  | 1.698076  |
| H  | -6.753470 | 2.731167  | 2.108294  |
| C  | -6.430294 | 1.323525  | 0.514314  |
| H  | -7.341898 | 1.584329  | -0.011783 |
| C  | -5.594895 | 0.354547  | -0.017893 |
| H  | -5.855010 | -0.135207 | -0.948689 |
| C  | -4.095008 | -2.132170 | -0.508609 |
| C  | -5.211555 | -2.770310 | 0.034736  |
| H  | -5.668374 | -2.373400 | 0.933497  |
| C  | -5.733531 | -3.903036 | -0.567762 |
| H  | -6.600100 | -4.385341 | -0.129277 |
| C  | -5.147174 | -4.430599 | -1.710861 |
| H  | -5.554383 | -5.320458 | -2.176047 |
| C  | -4.032155 | -3.802840 | -2.249276 |
| H  | -3.566126 | -4.196945 | -3.145558 |
| C  | -3.512286 | -2.660492 | -1.661589 |
| H  | -2.648616 | -2.171012 | -2.095898 |
| C  | -1.403748 | 3.559942  | 0.112858  |



|   |           |          |           |
|---|-----------|----------|-----------|
| C | -1.851875 | 4.848338 | -0.006672 |
| H | -2.850797 | 5.100297 | 0.328589  |
| C | -1.023067 | 5.849248 | -0.542770 |
| H | -1.399337 | 6.860461 | -0.644752 |
| C | 0.266332  | 5.557843 | -0.895342 |
| H | 0.943581  | 6.318019 | -1.265118 |
| H | -2.044525 | 2.825308 | 0.576536  |
| N | 2.075310  | 4.026211 | -1.016773 |

Comp 24

|    |           |           |           |
|----|-----------|-----------|-----------|
| Pt | -2.189913 | -0.881176 | -0.082104 |
| Cl | -4.246757 | -2.108247 | -0.441954 |
| N  | -0.924750 | -2.415795 | -0.426239 |
| N  | -3.350592 | 0.737921  | 0.308012  |
| C  | -1.336481 | -3.651274 | -0.796884 |
| H  | -2.404796 | -3.745615 | -0.954108 |
| C  | 0.746683  | -4.527270 | -0.681080 |
| C  | 1.276515  | -3.286450 | -0.236498 |
| C  | 0.382265  | -2.176310 | -0.230513 |
| C  | 0.681984  | -0.769350 | -0.022132 |
| C  | 1.958538  | -0.204336 | -0.086797 |
| H  | 2.819516  | -0.795841 | -0.361027 |
| C  | 2.144797  | 1.148986  | 0.148582  |
| C  | 1.029119  | 1.939557  | 0.430370  |
| H  | 1.165987  | 2.995668  | 0.635546  |
| C  | -0.245088 | 1.399150  | 0.410041  |
| H  | -1.083449 | 2.060435  | 0.594797  |
| C  | -0.464334 | 0.043395  | 0.159237  |
| C  | -3.562458 | 1.675878  | -0.619565 |
| H  | -3.052446 | 1.538465  | -1.563792 |
| C  | -4.377501 | 2.769476  | -0.415469 |
| H  | -4.501221 | 3.484843  | -1.215430 |
| C  | -5.013312 | 2.910675  | 0.816855  |
| C  | -4.793721 | 1.927767  | 1.784247  |
| H  | -5.272346 | 1.999226  | 2.751873  |
| C  | -3.970992 | 0.870162  | 1.492047  |
| H  | -3.788080 | 0.088781  | 2.216930  |
| N  | 3.436859  | 1.714564  | 0.099959  |
| C  | 4.517383  | 1.037569  | 0.695895  |
| C  | 4.352230  | 0.374229  | 1.913753  |
| H  | 3.387002  | 0.394401  | 2.405829  |
| C  | 5.412379  | -0.304785 | 2.492320  |
| H  | 5.263734  | -0.810773 | 3.439820  |
| C  | 6.658457  | -0.325663 | 1.879615  |
| H  | 7.487093  | -0.852489 | 2.337693  |
| C  | 6.827617  | 0.338193  | 0.671974  |
| H  | 7.791334  | 0.325417  | 0.175032  |
| C  | 5.769220  | 1.007380  | 0.078786  |
| H  | 5.909183  | 1.511086  | -0.870133 |
| C  | 3.638874  | 2.929003  | -0.581903 |
| C  | 4.525339  | 3.885829  | -0.083636 |
| H  | 5.062605  | 3.688140  | 0.836254  |
| C  | 4.718154  | 5.080553  | -0.757374 |
| H  | 5.409524  | 5.811498  | -0.352917 |
| C  | 4.023558  | 5.353130  | -1.928821 |
| H  | 4.172685  | 6.291384  | -2.449885 |
| C  | 3.135295  | 4.407451  | -2.422486 |
| H  | 2.589677  | 4.600385  | -3.339513 |
| C  | 2.947057  | 3.203289  | -1.762856 |
| H  | 2.259830  | 2.466992  | -2.162408 |
| C  | 2.616076  | -3.254469 | 0.212039  |
| C  | 3.403736  | -4.371907 | 0.134588  |

|   |           |           |           |
|---|-----------|-----------|-----------|
| H | 4.423631  | -4.333720 | 0.497985  |
| C | 2.896477  | -5.571502 | -0.394509 |
| H | 3.538333  | -6.442110 | -0.462504 |
| C | 1.587240  | -5.651939 | -0.783592 |
| H | 1.155470  | -6.575458 | -1.149635 |
| H | 3.016865  | -2.363145 | 0.670609  |
| N | -0.568116 | -4.678139 | -0.985184 |
| O | -5.819981 | 3.915137  | 1.148312  |
| C | -6.068906 | 4.929536  | 0.185052  |
| H | -6.544808 | 4.513242  | -0.705951 |
| H | -6.744854 | 5.633704  | 0.663399  |
| H | -5.143546 | 5.440785  | -0.091159 |
